# Supplementary material for: Age-related DNA methylation changes are sex-specific: a comprehensive assessment
Source: bioRxiv preprint, doi:10.1101/2020.01.15.905224, version 2 (2020-08-05)
Supplement: Supplementary File 6 [file 905224_file10.xlsx]

## Sheet: females saVMPs
CpG	CHR	MAPINFO	UCSC_REFGENE_NAME	RELATION_TO_UCSC_CPG_ISLAND	Direction in females	Direction in males	Bonferroni corrected p-value in females	Bonferroni corrected p-value in males	Found in Inoshita et al., 2015?	Found in Singmann et al., 2015?	Found in Yousefi et al., 2015?
cg09688588	3	191047460	CCDC50;CCDC50;CCDC50;CCDC50;UTS2D	Island	++++	++++	6.13182e-10	0.119816	0	0	0
cg14226182	3	158450251	RARRES1;RARRES1;RARRES1;RARRES1	Island	++++	++++	6.26626e-10	0.0688601	0	0	0
cg21303386	1	241520311	RGS7;RGS7	Island	++++	++++	1.83889e-08	0.256946	0	0	0
cg22743761	2	162273648	TBR1	Island	++++	++++	4.88906e-08	1	0	0	0
cg22934308	2	177038617		N_Shore	++++	++++	5.00711e-08	0.122374	0	0	0
cg22657780	2	180725907	ZNF385B;MIR1258;ZNF385B	Island	++++	++++	5.06941e-08	0.689584	0	0	0
cg05176991	18	24128116	KCTD1;KCTD1;KCTD1	Island	++++	++++	5.8531e-08	0.203039	0	0	0
cg06899953	19	12163679	ZNF878	S_Shore	++++	++++	7.86972e-08	0.128178	0	0	0
cg26309134	19	56879571	ZNF542;ZNF542;ZNF542;ZNF542	Island	++++	++++	1.26866e-07	1	0	0	0
cg22665692	10	128593943	DOCK1	Island	++++	++++	1.57591e-07	1	0	0	0
cg20483324	13	46189838	FAM194B;FAM194B		++++	++++	3.06952e-07	0.243896	0	0	0
cg13392687	11	94502558	AMOTL1	Island	++++	++++	3.42005e-07	0.273112	0	0	0
cg23211240	11	111383624	MIR34B;BTG4;MIR34C	Island	++++	++++	3.95126e-07	0.176774	0	0	0
cg11915388	22	42470451	FAM109B	Island	++++	++++	6.61712e-07	1	0	0	0
cg24768649	2	213402181	ERBB4;ERBB4	Island	++++	++++	7.39426e-07	1	0	0	0
cg15476523	4	85887600	C4orf12;WDFY3	Island	++++	++++	7.47951e-07	0.328561	0	0	0
cg16407471	11	43602914	MIR129-2	Island	++++	++++	8.12549e-07	1	0	0	0
cg24168914	8	17354322	SLC7A2	Island	++++	++++	8.23697e-07	0.0838453	0	0	0
cg25236230	15	40212502	GPR176;GPR176	Island	++++	++++	1.08799e-06	0.24019	0	0	0
cg11404058	5	14011843		Island	++++	++++	1.27621e-06	1	0	0	0
cg24362812	18	11148769	FAM38B	Island	++++	++++	1.5182e-06	1	0	0	0
cg07835424	2	200327334		Island	++++	++++	1.53033e-06	1	0	0	0
cg17280346	3	147126703	ZIC1	N_Shore	++++	++++	1.81463e-06	1	0	0	0
cg04326854	6	166075453	PDE10A;PDE10A;PDE10A	Island	++++	++++	1.81823e-06	0.124538	0	0	0
cg03146949	19	56879662	ZNF542;ZNF542;ZNF542;ZNF542	Island	++++	++++	2.10974e-06	1	0	0	0
cg16652741	2	219825300	CDK5R2	Island	++++	++++	2.3078e-06	1	0	0	0
cg16898420	9	103791078	LPPR1;LPPR1	Island	++++	++++	2.62881e-06	1	0	0	0
cg00332937	5	72740460		Island	++++	++++	2.6662e-06	0.113455	0	0	0
cg26002512	7	119913771	KCND2;KCND2	Island	++++	++++	2.89343e-06	0.558422	0	0	0
cg11965976	5	127874463	FBN2	Island	++++	++++	2.95508e-06	1	0	0	0
cg09838285	19	11805721		Island	++++	++++	3.40693e-06	0.110963	0	0	0
cg18758796	5	131593413	PDLIM4;PDLIM4;PDLIM4;PDLIM4	Island	++++	++++	3.55449e-06	0.586622	0	0	0
cg22319311	8	98290310	TSPYL5	Island	++++	++++	3.56433e-06	1	0	0	0
cg23684316	2	72946664	EXOC6B		++++	++++	4.02339e-06	0.152082	0	0	0
cg08328777	15	45422004	DUOX1;DUOX1;DUOXA1;DUOXA1	Island	++++	++++	4.52837e-06	0.704668	0	0	0
cg11188318	3	158449803	RARRES1;RARRES1	Island	++++	++++	4.66937e-06	1	0	0	0
cg08594218	17	46803008	HOXB13	Island	++++	++++	4.71527e-06	1	0	0	0
cg24583615	13	96705712	UGGT2;UGGT2	Island	++++	++++	5.12516e-06	0.500711	0	0	0
cg17393267	3	192127356	FGF12;FGF12	Island	++++	++++	5.17106e-06	1	0	0	0
cg03361164	6	100915805		Island	++++	++++	6.05968e-06	0.152345	0	0	0
cg27641522	18	53447560		Island	++++	++++	6.18757e-06	1	0	0	0
cg05764376	15	71184590	LRRC49;THAP10	Island	++++	++++	6.45645e-06	0.0984699	0	0	0
cg17712694	5	16180068		Island	++++	++++	7.88939e-06	0.456772	0	0	0
cg10981009	14	62279702		Island	++++	++++	8.26649e-06	1	0	0	0
cg10628818	1	38100255	RSPO1;RSPO1	Island	++++	++++	8.37469e-06	1	0	0	0
cg18345115	19	10541478	PDE4A;PDE4A	N_Shore	++++	++++	8.40093e-06	0.0523336	0	0	0
cg05528623	1	2387670		Island	++++	++++	8.41732e-06	1	0	1	0
cg20464246	1	216774397	ESRRG;ESRRG;ESRRG;ESRRG;ESRRG	Island	++++	++++	8.58783e-06	1	0	0	0
cg11097433	10	108924557	SORCS1;SORCS1	Island	++++	++++	8.6862e-06	0.0509892	0	0	0
cg27280575	20	44540813	PLTP;PLTP	Island	++++	++++	8.84032e-06	1	0	0	0
cg16126286	1	243646235	SDCCAG8	N_Shore	++++	++-+	1.17456e-05	1	0	0	0
cg23805357	10	25464139	LOC100128811;GPR158	Island	++++	++++	1.21063e-05	1	0	0	0
cg21537235	5	140346394	PCDHAC2;PCDHA7;PCDHA12;PCDHA6;PCDHA10;PCDHA4;PCDHA11;PCDHA8;PCDHA6;PCDHA1;PCDHA2;PCDHA1;PCDHA9;PCDHA13;PCDHA5;PCDHAC1;PCDHA3;PCDHAC2;PCDHA10	Island	++++	++++	1.34933e-05	0.328561	0	0	0
cg06081306	17	37760830	NEUROD2	N_Shore	++++	++++	1.43262e-05	1	0	0	0
cg04534765	18	74962369	GALR1;GALR1	Island	++++	++++	1.4336e-05	1	0	0	0
cg02434121	7	4901798	PAPOLB;RADIL	S_Shore	++++	++++	1.4395e-05	0.0818779	0	0	0
cg21482659	7	82073453	CACNA2D1	Island	++++	++++	1.54083e-05	0.534813	0	0	0
cg05175318	14	79747774	NRXN3;NRXN3;NRXN3	S_Shore	++++	++++	1.57755e-05	0.21563	0	0	0
cg10535922	5	122426269	PRDM6	Island	++++	++++	1.69035e-05	1	0	0	0
cg21834207	1	50489827	AGBL4	Island	++++	++++	1.87004e-05	0.865669	0	0	0
cg18150439	2	139537824	NXPH2	Island	++++	++++	1.99989e-05	0.0507925	0	0	0
cg07846220	18	7117680	LAMA1	Island	++++	++++	2.16221e-05	1	0	0	0
cg20214328	19	39378302	SIRT2;SIRT2		++++	++++	2.18254e-05	1	0	0	0
cg05142211	3	181430485	SOX2OT;SOX2	Island	++++	++++	2.23992e-05	1	0	0	0
cg15734911	6	84743364	MRAP2	Island	++++	++++	2.29599e-05	0.157788	0	0	0
cg26053832	16	54971600		Island	++++	++++	2.32026e-05	1	0	0	0
cg06653045	17	68165064	KCNJ2	Island	++++	++++	2.40846e-05	0.173003	0	0	0
cg10543363	10	11784253	ECHDC3	N_Shore	++++	++++	2.49929e-05	0.0720735	0	0	0
cg04011228	2	154335250	RPRM;RPRM	Island	++++	++++	2.57832e-05	0.134048	0	0	0
cg27062795	19	56879613	ZNF542;ZNF542;ZNF542;ZNF542	Island	++++	++++	2.86589e-05	1	0	0	0
cg12832313	5	140346236	PCDHAC2;PCDHAC2;PCDHA7;PCDHA12;PCDHA6;PCDHA10;PCDHA4;PCDHA11;PCDHA8;PCDHA6;PCDHA1;PCDHA2;PCDHA1;PCDHA9;PCDHA13;PCDHA5;PCDHAC1;PCDHA3;PCDHAC2;PCDHA10	Island	++++	++++	2.91409e-05	1	0	0	0
cg10589949	1	119544161		Island	++++	++++	2.93245e-05	1	0	0	0
cg15542784	4	41750722	PHOX2B;PHOX2B	N_Shore	++++	++-+	2.96426e-05	0.509892	0	0	0
cg26470798	16	54971598		Island	++++	++++	3.0023e-05	1	0	0	0
cg06248560	18	35104681	BRUNOL4;BRUNOL4;BRUNOL4;BRUNOL4	Island	++++	++++	3.00459e-05	0.128112	0	0	0
cg03126821	8	99076526	C8orf47;C8orf47	N_Shore	++++	++++	3.00984e-05	0.232911	0	0	0
cg08101977	16	1231407	CACNA1H;CACNA1H	S_Shore	++++	++++	3.37414e-05	1	0	0	0
cg23130131	4	111544299	PITX2;PITX2;PITX2	Island	++++	++++	3.69221e-05	0.232026	0	0	0
cg07570142	6	132722421	MOXD1	Island	++++	++++	3.69549e-05	0.148377	0	0	0
cg14889768	6	146864529	RAB32	Island	++++	++++	3.73156e-05	1	0	0	0
cg06334284	1	57044991	PPAP2B;PPAP2B;PPAP2B;PPAP2B	Island	++++	++++	3.8037e-05	0.0635152	0	0	0
cg01959730	1	119548825		N_Shore	++++	++++	3.8824e-05	0.13513	0	0	0
cg15304699	10	134600675	NKX6-2	Island	++++	++++	3.90207e-05	0.640726	0	0	0
cg07974511	2	63283013	OTX1	Island	++++	++++	3.90863e-05	0.160805	0	0	0
cg24946597	8	31497464	NRG1;NRG1	Island	++++	++++	4.40704e-05	1	0	0	0
cg18059088	4	11430353	HS3ST1;HS3ST1	Island	++++	++++	4.51853e-05	1	0	0	0
cg22742299	19	1313502		Island	++++	++++	4.52509e-05	1	0	0	0
cg10162522	14	63512760	KCNH5;KCNH5;KCNH5	Island	++++	++++	4.53821e-05	1	0	0	0
cg01440841	4	154681066	RNF175;RNF175	Island	++++	-+++	4.74806e-05	0.062761	0	0	0
cg07352438	18	5543548	EPB41L3	Island	++++	++++	4.75462e-05	0.0764347	0	0	0
cg08427928	7	32997111	FKBP9;FKBP9	Island	++++	-+++	5.17434e-05	1	0	0	0
cg01620164	2	164590272	FIGN	N_Shelf	++++	+++-	5.33829e-05	1	0	0	0
cg23112821	14	100658902		N_Shore	++++	++++	5.73834e-05	0.624331	0	0	0
cg23634124	17	48049952	DLX4;DLX4	Island	++++	++-+	5.78752e-05	1	0	0	0
cg07498415	11	45721853			++++	++++	5.88262e-05	0.909936	0	0	0
cg15186181	8	55370434	SOX17	Island	++++	++++	5.9482e-05	0.403651	0	0	0
cg14939652	14	33407765	NPAS3;NPAS3;NPAS3;NPAS3	S_Shelf	++++	++-+	6.10231e-05	1	0	0	0
cg11215976	1	236849942	ACTN2;ACTN2	Island	++++	++++	6.10887e-05	1	0	0	0
cg20793089	15	52588057	MYO5C	Island	++++	++++	6.28922e-05	1	0	0	0
cg24621437	10	108924560	SORCS1;SORCS1	Island	++++	++++	6.32201e-05	0.509236	0	0	0
cg03654433	5	176170566		Island	++++	++++	6.36792e-05	1	0	0	0
cg03437157	6	100052633		S_Shore	++++	++++	6.5417e-05	0.20717	0	0	0
cg00989492	1	70033219		Island	++++	++++	6.73845e-05	1	0	0	0
cg06273376	22	48972349	FAM19A5;FAM19A5	Island	++++	++++	6.91224e-05	1	0	0	0
cg00335712	4	94749865	ATOH1	Island	++++	++++	6.96142e-05	0.453493	0	0	0
cg16245345	5	179922339	CNOT6	S_Shore	++++	++++	7.10898e-05	1	0	0	0
cg03430846	8	31497082	NRG1	Island	++++	++++	7.13849e-05	0.429556	0	0	0
cg20194314	13	28503060		Island	++++	++-+	7.15489e-05	0.419063	0	0	0
cg06000883	21	39288720	KCNJ6	Island	++++	++++	7.47623e-05	1	0	0	0
cg01923218	11	93063888	CCDC67;CCDC67	Island	++++	++++	7.68609e-05	0.133556	0	0	0
cg03502002	18	74962133	GALR1;GALR1	Island	++++	++++	7.70905e-05	0.0753854	0	0	0
cg16418810	4	5713100	EVC;EVC	Island	++++	++++	7.94514e-05	1	0	0	0
cg15050390	11	111847984	DIXDC1;DIXDC1	Island	++++	++++	8.22386e-05	1	0	0	0
cg19704805	12	16758715	LMO3;LMO3		++++	++++	8.28288e-05	1	0	0	0
cg26399164	11	69455217	CCND1	Island	++++	++++	8.44683e-05	1	0	0	0
cg26218412	1	220921611	MOSC2	Island	++++	++++	8.45667e-05	1	0	0	0
cg12213062	2	220299653	SPEG	Island	++++	++++	8.82064e-05	1	0	0	0
cg04448477	4	55095148	PDGFRA	N_Shore	++++	++++	9.2666e-05	0.181758	0	0	0
cg17285922	11	87908558	RAB38;RAB38	Island	++++	++++	9.28299e-05	1	0	0	0
cg13683040	9	37035766	PAX5	Island	++++	++++	9.6568e-05	0.700077	0	0	0
cg13533151	18	24764966	CHST9	Island	++++	++++	9.91913e-05	0.0784349	0	0	0
cg26578856	19	11998651	ZNF69	N_Shore	++++	++++	0.000102503	1	0	0	0
cg07466705	3	11034749	SLC6A1	Island	++++	++-+	0.000103192	0.0569243	0	0	0
cg20631014	6	84419242	SNAP91;SNAP91	Island	++++	++++	0.000103224	1	0	0	0
cg08974450	16	84402160	ATP2C2;ATP2C2	Island	++++	++++	0.000104077	1	0	0	0
cg21701379	12	31079694	TSPAN11	Island	++++	-+++	0.00010611	1	0	0	0
cg13632816	9	113341925	SVEP1;SVEP1	Island	++++	++++	0.000113455	1	0	0	0
cg08890345	16	68481248	SMPD3	Island	++++	++++	0.000116734	1	0	0	0
cg10401879	10	83634276	NRG3;NRG3	Island	++++	++++	0.00011962	1	0	0	0
cg11063729	6	10415653	TFAP2A;TFAP2A	N_Shore	++++	++++	0.000119849	0.766642	0	0	0
cg09227138	6	84419244	SNAP91;SNAP91	Island	++++	++++	0.000121653	1	0	0	0
cg03098159	4	3873884		Island	++++	++++	0.00012444	0.519402	0	0	0
cg24258699	8	72756901	MSC	S_Shore	++++	++++	0.000127227	1	0	0	0
cg20986652	1	48175663		Island	++++	++++	0.000130703	1	0	0	0
cg00647741	19	58693450	ZNF274;ZNF274;ZNF274	N_Shore	++++	++++	0.000132015	0.14077	0	0	0
cg09472360	3	61547130	PTPRG	Island	++++	++++	0.000134703	0.0583015	0	0	0
cg19359627	1	78354760	NEXN	S_Shore	++++	++++	0.000136277	1	0	0	0
cg11163620	4	157997554	GLRB;GLRB;GLRB;GLRB	Island	++++	++++	0.000141393	0.318888	0	0	0
cg22972989	7	54614210	VSTM2A	Island	++++	++++	0.000142016	0.151492	0	0	0
cg26316023	7	122526826	CADPS2;CADPS2;CADPS2	Island	++++	++++	0.000146311	0.843372	0	0	0
cg10403161	10	93805870		S_Shore	++++	++-+	0.000147033	0.0760084	0	0	0
cg00319774	8	33455184	DUSP26	N_Shore	++++	++-+	0.000154378	1	0	0	0
cg20276377	3	99595026	C3orf26;FILIP1L;MIR548G;FILIP1L;FILIP1L;FILIP1L	Island	++++	++-+	0.000155755	1	0	0	0
cg07303244	8	54164161	OPRK1;OPRK1	Island	++++	++++	0.000155984	1	0	0	0
cg00046625	1	66258760	PDE4B;PDE4B	Island	++++	++++	0.000156017	0.0507269	0	0	0
cg13094274	6	890230		S_Shelf	++++	++++	0.000161592	0.0972894	0	0	0
cg22954449	5	5140001	ADAMTS16	Island	++++	++++	0.00016592	0.248552	0	0	0
cg05703053	2	169769616			++++	++++	0.000169756	0.0992241	0	0	0
cg03609960	12	99288805	ANKS1B;ANKS1B;ANKS1B	Island	++++	-+++	0.000173724	0.0718768	0	0	0
cg24566400	10	95361208	RBP4	Island	++++	++++	0.000173888	0.541043	0	0	0
cg13776884	2	176608868			++++	++++	0.000175626	0.162674	0	0	0
cg22897615	6	32117079	PRRT1	Island	++++	++++	0.000180708	0.164116	0	0	0
cg09768093	1	32930511	ZBTB8B	Island	++++	++++	0.000181069	0.342661	0	0	0
cg20255176	11	35640727	FJX1	Island	++++	++++	0.000181725	0.156378	0	0	0
cg16400492	5	140306213	PCDHA7;PCDHA12;PCDHA6;PCDHAC1;PCDHA10;PCDHA4;PCDHA11;PCDHA8;PCDHA6;PCDHA1;PCDHA2;PCDHA1;PCDHA9;PCDHA13;PCDHA5;PCDHA3;PCDHAC1;PCDHA10	Island	++++	++++	0.000183168	1	0	0	0
cg19760898	7	123673583	TMEM229A	Island	++++	++++	0.000184807	1	0	0	0
cg09839635	5	63461803	RNF180;RNF180	Island	++++	++++	0.00018684	1	0	0	0
cg09574757	22	19747024	TBX1;TBX1;TBX1	Island	++++	++-+	0.000195825	1	0	0	0
cg02146929	6	166076874	PDE10A;PDE10A	Island	++++	++++	0.00020094	1	0	0	0
cg24136205	13	100624293	ZIC5	Island	++++	+++-	0.000208679	1	0	0	0
cg03547745	17	70117522	SOX9;SOX9	Island	++++	++++	0.000212056	0.162411	0	0	0
cg16604243	5	114515626	TRIM36;TRIM36;TRIM36	Island	++++	++++	0.000216844	0.210908	0	0	0
cg26753208	2	18569314			++++	++++	0.000219237	0.674828	0	0	0
cg20927661	2	5837002	SOX11;SOX11	Island	++++	++++	0.000219598	1	0	0	0
cg25958283	18	11752089	GNAL;GNAL;GNAL;GNAL	Island	++++	++++	0.000223467	1	0	0	0
cg04692454	6	99275305		N_Shore	++++	++++	0.000225304	0.683682	0	0	0
cg15174552	2	118982352		Island	++++	++++	0.000230714	1	0	0	0
cg11692124	17	79316097		Island	++++	++++	0.000231009	0.391191	0	0	0
cg13656878	9	119048807	PAPPA		++++	++++	0.000241469	1	0	0	0
cg12207153	1	38519255			++++	++++	0.000241666	0.071844	0	0	0
cg26000554	1	220921614	MOSC2	Island	++++	++++	0.000244158	1	0	0	0
cg08416723	3	129147577	C3orf25	Island	++++	++++	0.000244355	1	0	0	0
cg14936269	16	1968232	HS3ST6	Island	++++	++++	0.000245011	1	0	0	0
cg09322259	6	106434131		Island	++++	++++	0.000246355	1	0	0	0
cg23593167	1	220921855	MOSC2;MOSC2	Island	++++	++++	0.00024947	0.260684	0	0	0
cg10364040	2	176981064	HOXD10	Island	++++	++++	0.000251044	1	0	0	0
cg09123368	10	118899024	VAX1;VAX1	N_Shore	++++	++-+	0.000251962	1	0	0	0
cg15190445	6	108442528		S_Shore	++++	++++	0.000255963	0.666303	0	0	0
cg23930945	11	15136376	INSC;INSC	Island	++++	++++	0.000257897	1	0	0	0
cg24632247	3	35680890		Island	++++	++++	0.000259176	0.130539	0	0	0
cg09758420	6	41343830		S_Shore	++++	++++	0.000265144	0.334463	0	0	0
cg18355902	4	154681128	RNF175;RNF175	Island	++++	++++	0.000265537	0.659417	0	0	0
cg09724492	7	94537870	PPP1R9A;PPP1R9A;PPP1R9A;PPP1R9A;PPP1R9A	S_Shore	++++	++++	0.000268751	1	0	0	0
cg00242839	10	6130578	RBM17;RBM17	N_Shore	++++	++++	0.00027121	0.0504318	0	0	0
cg15391359	11	14995536		Island	++++	++-+	0.000274784	1	0	0	0
cg27620317	7	25900768		N_Shore	++++	++++	0.000276129	0.440704	0	0	0
cg03932978	6	55444488	HMGCLL1;HMGCLL1	S_Shore	++++	++++	0.000281277	0.474151	0	0	0
cg22274395	4	141490067	UCP1	Island	++++	++++	0.000281966	1	0	0	0
cg09584188	16	58364996			++++	++++	0.000286819	1	0	0	0
cg24410535	4	187645144	FAT1	Island	++++	++++	0.000288196	1	0	0	0
cg13940693	18	907605	ADCYAP1;ADCYAP1	Island	++++	++++	0.000292918	0.0866981	0	0	0
cg10981598	20	36148699	BLCAP;BLCAP;BLCAP;BLCAP;NNAT;NNAT;BLCAP	Island	++++	++++	0.000293934	0.330856	0	0	0
cg21389743	3	170136499	CLDN11	Island	++++	++++	0.000298033	1	0	0	0
cg00441434	8	26434054	DPYSL2	N_Shore	++++	++++	0.000298721	0.055088	0	0	0
cg08095852	4	176987020	WDR17;WDR17;WDR17;WDR17	Island	++++	++++	0.000301935	0.191365	0	0	0
cg03602280	18	11148914	FAM38B	Island	++++	++++	0.000303443	1	0	0	0
cg05299793	14	63512588	KCNH5;KCNH5;KCNH5	Island	++++	++++	0.000305509	0.71221	0	0	0
cg09423283	6	146755301	GRM1;GRM1	N_Shore	++++	++++	0.000314625	0.0723358	0	0	0
cg21458907	3	62860802	CADPS;CADPS;CADPS;CADPS;CADPS;CADPS	Island	++++	++++	0.000319084	1	0	0	0
cg11192975	8	16859451	FGF20	Island	++++	++++	0.000320429	0.468248	0	0	0
cg22155786	13	110992996	COL4A2		++++	++++	0.000321544	0.437097	0	0	0
cg07382435	1	50880864		N_Shore	++++	++++	0.000339382	0.50563	0	0	0
cg02787980	8	28174814	PNOC;PNOC		++++	++-+	0.000346268	0.073713	0	0	0
cg16997203	11	44972679	TP53I11;TP53I11	Island	++++	++++	0.000352498	0.476774	0	0	0
cg26252281	6	146864885	RAB32;RAB32	Island	++++	++++	0.000353482	1	0	0	0
cg26668276	7	96633311	DLX6AS	N_Shore	++++	++++	0.000354465	1	0	0	0
cg19171596	6	125284245	STL	Island	++++	++++	0.000360368	0.55252	0	0	0
cg04457317	3	50567932			++++	++++	0.000361023	1	0	0	0
cg16400999	2	180726349	ZNF385B;MIR1258	Island	++++	++++	0.000361351	1	0	0	0
cg05454619	11	79148502	ODZ4	Island	++++	++++	0.000362991	0.321511	0	0	0
cg02653557	19	58095424	ZIK1	Island	++++	++++	0.000365286	1	0	0	0
cg16986315	1	19181291	TAS1R2	Island	++++	++++	0.000379714	1	0	0	0
cg19005955	5	132938694	FSTL4		++++	++++	0.00038037	1	0	0	0
cg05361559	8	22549103	EGR3	Island	++++	-+++	0.00039283	0.369877	0	0	0
cg15871797	14	101139695			++++	++++	0.000394142	0.612854	0	0	0
cg00612625	10	100991745	HPSE2;HPSE2;HPSE2;HPSE2	N_Shore	++++	++++	0.000396109	0.0673517	0	0	0
cg21317965	6	50803850	TFAP2B		++++	++++	0.000400044	0.0772216	0	0	0
cg00660608	10	125853219		Island	++++	++++	0.000401356	0.181004	0	0	0
cg17603689	1	50883013		Island	++++	++++	0.000402995	1	0	0	0
cg02965290	17	38108850			++++	++++	0.000405618	1	0	0	0
cg25485913	19	49568962			++++	++++	0.000407586	1	0	1	0
cg08039116	7	43152254	HECW1;HECW1	Island	++++	++++	0.00041316	0.0607608	0	0	0
cg18097532	11	17498541	ABCC8	Island	++++	++++	0.00041316	0.0518418	0	0	0
cg24851854	1	59042275	TACSTD2	Island	++++	++++	0.000420374	0.551536	0	0	0
cg07780095	12	85674296	ALX1	Island	++++	++++	0.000432835	0.425621	0	0	0
cg00344900	3	126006749		Island	++++	++++	0.000440376	0.362335	0	0	0
cg10143416	2	241907034		S_Shore	++++	++++	0.000443983	1	0	0	0
cg17504999	4	134072723	PCDH10;PCDH10	Island	++++	++++	0.000449558	0.0745656	0	0	0
cg12163490	16	65155841	CDH11;CDH11	Island	++++	++++	0.000455788	1	0	0	0
cg14224762	6	72596566	RIMS1	S_Shore	++++	++++	0.0004571	1	0	0	0
cg01151966	10	83634485	NRG3;NRG3	Island	++++	++++	0.000464313	1	0	0	0
cg10989763	2	139537745	NXPH2	Island	++++	++++	0.000465953	1	0	0	0
cg24241928	4	154711099	SFRP2	N_Shore	++++	++-+	0.000467593	1	0	0	0
cg01927745	5	72677723		Island	++++	++++	0.00046956	1	0	0	0
cg21790626	19	58220494	ZNF154;ZNF154	Island	++++	++++	0.000479725	0.150246	0	0	0
cg06632207	12	54070931	ATP5G2;ATP5G2	N_Shore	++++	++++	0.000492513	1	0	0	0
cg19355087	10	134600295	NKX6-2	Island	++++	++++	0.000497432	1	0	0	0
cg01255414	3	192127991	FGF12;FGF12	Island	++++	++++	0.000500383	1	0	0	0
cg09438147	2	210636533	UNC80;UNC80	Island	++++	++++	0.000506613	1	0	0	0
cg20442599	6	108479500		Island	++++	++++	0.000514811	0.558094	0	0	0
cg26351229	8	132053780	ADCY8	Island	++++	++++	0.000515467	1	0	0	0
cg05521538	5	1258994	TERT;TERT	S_Shore	++++	++++	0.000531862	0.455788	0	0	0
cg08734600	10	126136228	NKX1-2	Island	++++	++++	0.000534813	1	0	0	0
cg23665778	10	128593946	DOCK1	Island	++++	++++	0.000534813	1	0	0	0
cg21940042	19	11998508	ZNF69	N_Shore	++++	++++	0.000544322	1	0	0	0
cg27312652	21	38073517	SIM2;SIM2	Island	++++	++++	0.000557766	0.0860751	0	0	0
cg15124820	3	126703827		S_Shore	++++	++-+	0.000564325	0.0520713	0	0	0
cg19776515	8	57232395	SDR16C5	Island	++++	++++	0.000568259	1	0	0	0
cg06812991	4	156129574	NPY2R	Island	++++	++++	0.000570555	1	0	0	0
cg17737621	20	21372480		S_Shore	++++	++++	0.000570555	0.184151	0	0	0
cg01942816	7	5535463	MIR589;FBXL18	S_Shore	++++	++++	0.000573178	0.156214	0	0	0
cg24320612	20	61051317	GATA5	Island	++++	++++	0.00058072	1	0	0	0
cg21884421	15	65648103	IGDCC3	Island	++++	++++	0.000588262	1	0	0	0
cg06600429	5	160975956	GABRB2;GABRB2	S_Shore	++++	++++	0.000605968	1	0	0	0
cg03859162	13	99404887	SLC15A1;SLC15A1	Island	++++	++++	0.000620396	1	0	0	0
cg20635409	12	103359273		Island	++++	++++	0.000621052	1	0	0	0
cg01933073	4	186732942	SORBS2;SORBS2;SORBS2;SORBS2;SORBS2;SORBS2;SORBS2		++++	++-+	0.000636464	1	0	0	0
cg06040034	8	1618448	DLGAP2	S_Shore	++++	++-+	0.000639087	1	0	0	0
cg10785051	5	133449927	TCF7;TCF7;TCF7;TCF7;TCF7	Island	++++	++++	0.000639743	0.628594	0	0	0
cg04489586	20	36148642	BLCAP;BLCAP;BLCAP;BLCAP;NNAT;NNAT;BLCAP	Island	++++	++++	0.000642038	0.247667	0	0	0
cg05728135	6	125420775		Island	++++	++++	0.00064335	1	0	0	0
cg24827726	3	14581937	GRIP2		++++	++++	0.000648268	0.14618	0	0	0
cg06617456	8	68864769	PREX2;PREX2	Island	++++	++++	0.000652203	0.529567	0	0	0
cg14116122	12	85673884	ALX1	Island	++++	++++	0.000663352	0.321183	0	0	0
cg00608299	7	155579788		N_Shore	++++	++-+	0.00066368	1	0	0	0
cg10172432	13	95357042		N_Shore	++++	++++	0.000666303	0.194776	0	0	0
cg20321756	11	111848400	DIXDC1;DIXDC1;DIXDC1	Island	++++	++++	0.000667942	1	0	0	0
cg25074071	8	23261622	LOXL2;LOXL2	Island	++++	++++	0.000673845	1	0	0	0
cg01508023	4	82136116		Island	++++	++++	0.000674173	1	0	0	0
cg18443253	14	38678420	SSTR1	Island	++++	++++	0.000686305	1	0	0	0
cg10420161	10	102899983		Island	++++	++++	0.000689912	1	0	0	0
cg00387115	12	115889598		Island	++++	++++	0.000692207	1	0	0	0
cg10778836	9	99617387	ZNF782	S_Shore	++++	++++	0.000707947	1	0	0	0
cg00652796	3	96532832	EPHA6	Island	++++	++++	0.000708603	0.162083	0	0	0
cg23431892	3	190580589	LOC647309	Island	++++	++++	0.000719096	0.304493	0	0	0
cg08062118	22	22090796	YPEL1	Island	++++	++-+	0.0007309	0.231042	0	0	0
cg23671319	7	39044924	POU6F2;POU6F2		++++	++++	0.000741393	0.291671	0	0	0
cg18861572	19	15833849		Island	++++	++-+	0.000745328	0.182512	0	0	0
cg19989295	14	24641077	REC8;REC8	Island	++++	++++	0.000747951	0.899771	0	0	0
cg01501009	19	57183268	ZNF835	Island	++++	++++	0.000762379	1	0	0	0
cg21780326	11	100558100	FLJ32810	Island	++++	++++	0.000765986	1	0	0	0
cg15415452	13	112759355		Island	++++	++++	0.000768609	1	0	0	0
cg16721191	1	185703526	HMCN1	Island	++++	++++	0.000785988	0.0552192	0	0	0
cg08070725	13	39991764	LHFP		++++	++++	0.000786316	0.221762	0	0	0
cg18991549	5	140346309	PCDHAC2;PCDHAC2;PCDHA7;PCDHA12;PCDHA6;PCDHA10;PCDHA4;PCDHA11;PCDHA8;PCDHA6;PCDHA1;PCDHA2;PCDHA1;PCDHA9;PCDHA13;PCDHA5;PCDHAC1;PCDHA3;PCDHAC2;PCDHA10	Island	++++	-+++	0.000789267	1	0	0	0
cg07315745	11	129245707	BARX2	Island	++++	++++	0.00079517	1	0	0	0
cg05743346	7	71800987	CALN1;CALN1	Island	++++	++++	0.000798449	1	0	0	0
cg07865216	10	98910008	SLIT1		++++	++++	0.000810909	1	0	0	0
cg25293325	17	873413	NXN		++++	++++	0.0008155	1	0	0	0
cg01047904	12	20521183	PDE3A	N_Shore	++++	++++	0.000815828	0.935185	0	0	0
cg17302155	6	100061111	PRDM13	Island	++++	++++	0.000815828	0.771888	0	0	0
cg01603396	5	174154199	MSX2	S_Shore	++++	++++	0.000821074	1	0	0	0
cg23727983	11	125774082	DDX25;PUS3	N_Shore	++++	++++	0.000828288	0.836486	0	0	0
cg10223225	4	22517932	GPR125	Island	++++	++++	0.0008296	0.529567	0	0	0
cg07451370	11	126848024	KIRREL3;KIRREL3		++++	++++	0.000836814	0.0700077	0	0	0
cg08404028	16	23766112	CHP2;CHP2	Island	++++	++++	0.000850913	1	0	0	0
cg21475270	1	47909595		N_Shore	++++	++++	0.000857799	1	0	0	0
cg13964092	9	126773442	LHX2	Island	++++	++-+	0.000860751	0.131883	0	0	0
cg16437728	11	7273046	SYT9	Island	++++	-+++	0.000867637	0.0725654	0	0	0
cg01366419	7	70597091	WBSCR17	Island	++++	++++	0.00087026	1	0	0	0
cg17942639	2	154335184	RPRM;RPRM	Island	++++	++++	0.000872883	0.519074	0	0	0
cg20265748	14	89017615	PTPN21	N_Shore	++++	++++	0.000873867	1	0	0	0
cg04641171	15	79381805	RASGRF1;RASGRF1	Island	++++	++++	0.000880753	0.237698	0	0	0
cg00123055	8	55370951	SOX17	Island	++++	++++	0.000881409	1	0	0	0
cg04642923	11	33398366		Island	++++	++-+	0.000895509	1	0	0	0
cg02086349	1	149908606	MTMR11;MTMR11;MTMR11		++++	++++	0.000905018	1	0	0	0
cg24243753	6	97972900			++++	++++	0.000909281	0.941743	0	0	0
cg21702011	15	31599090			++++	++++	0.000916494	0.648268	0	0	0
cg06733419	6	85473344	TBX18	Island	++++	-+++	0.000927315	1	0	0	0
cg26727693	12	63544175	AVPR1A	Island	++++	++++	0.000934529	1	0	0	0
cg11438011	5	148033882	HTR4;HTR4;HTR4;HTR4;HTR4;HTR4;HTR4	Island	++++	++++	0.000940432	0.51645	0	0	0
cg00107187	14	105070998	TMEM179	Island	++++	++++	0.000944366	1	0	0	0
cg06820905	8	69243752		Island	++++	++++	0.00094535	0.697126	0	0	0
cg15108699	20	62509164	TPD52L2;TPD52L2;TPD52L2;TPD52L2;TPD52L2;TPD52L2	Island	++++	++++	0.000952564	0.0648268	0	0	0
cg08838671	22	42311374		Island	++++	++++	0.000973222	0.117652	0	0	0
cg27553955	2	42720326	KCNG3;KCNG3	Island	++++	++++	0.000977813	0.161133	0	0	0
cg22232327	18	53447594		Island	++++	-+++	0.000990273	1	0	0	0
cg02149446	19	47812519	C5AR1		++++	++++	0.000994536	0.0892557	0	0	0
cg00297950	1	110282525	GSTM3;GSTM3	Island	++++	++++	0.00100405	0.174741	0	0	0
cg03002352	2	17699688	RAD51AP2;RAD51AP2		++++	++++	0.00100864	1	0	0	0
cg17888985	10	126898290			++++	++++	0.00101028	0.398405	0	0	0
cg01445580	1	34631891	C1orf94;CSMD2	S_Shore	++++	++++	0.00101093	1	0	0	0
cg15818307	6	29521430		Island	++++	++++	0.00101815	1	0	0	0
cg03964958	2	176964720	HOXD12	Island	++++	++++	0.00104175	1	0	0	0
cg01824804	5	121413478	LOX	Island	++++	++++	0.00105159	1	0	0	0
cg04727357	4	7137270			++++	++++	0.00105487	1	0	0	0
cg21197774	3	192126742	FGF12;FGF12;FGF12	Island	++++	++++	0.00106438	1	0	0	0
cg18592365	1	79472536	ELTD1	Island	++++	++++	0.00107356	1	0	0	0
cg17173767	8	74005267	C8orf84	Island	++++	++++	0.0010775	1	0	0	0
cg16491617	8	54164391	OPRK1	Island	++++	++++	0.00108077	1	0	0	0
cg14785479	22	20792535	SCARF2;SCARF2	Island	++++	++++	0.00109815	1	0	0	0
cg03538470	11	73498718	MRPL48	N_Shore	++++	++++	0.00109914	0.0507269	0	0	0
cg22014661	6	62996130	KHDRBS2	Island	++++	++++	0.00109979	1	0	0	0
cg14073722	17	50235737	CA10;CA10;CA10;CA10	Island	++++	++++	0.00112307	1	0	0	0
cg26672959	3	65387308	MAGI1;MAGI1;MAGI1		++++	++++	0.00113193	1	0	0	0
cg02151625	6	166722060	PRR18	Island	++++	++++	0.00115587	1	0	0	0
cg12078605	2	80531500	CTNNA2;LRRTM1;CTNNA2	Island	++++	++++	0.00115947	1	0	0	0
cg08478039	17	12569204	MYOCD;MYOCD	Island	++++	++++	0.00116013	0.263439	0	0	0
cg00500705	12	114029659		Island	++++	++++	0.00116898	0.0803367	0	0	0
cg24271863	5	174178647		Island	++++	++++	0.00118243	0.186611	0	0	0
cg04100532	2	210636560	UNC80;UNC80	Island	++++	++++	0.00119325	1	0	0	0
cg08354406	10	115370978	NRAP;NRAP		++++	++-+	0.00119882	1	0	0	0
cg24672833	17	46659318		Island	++++	++++	0.00119948	1	0	0	0
cg01303723	10	134600680	NKX6-2	Island	++++	++++	0.00120636	1	0	0	0
cg10592592	10	74034663	DDIT4	Island	++++	++++	0.00123391	1	0	0	0
cg15586439	4	164264520	NPY5R	N_Shore	++++	++++	0.00123489	1	0	0	0
cg11548303	8	23567350		Island	++++	++++	0.00124506	1	0	0	0
cg16441259	8	11557906		Island	++++	++++	0.00125161	0.101782	0	0	0
cg25164624	20	3641641	GFRA4;GFRA4	Island	++++	++++	0.00127227	1	0	0	0
cg09442654	8	53477881	FAM150A;FAM150A	Island	++++	++++	0.00128178	0.0960762	0	0	0
cg23646360	6	10886130	SYCP2L	N_Shore	++++	++++	0.00128408	1	0	0	0
cg18963953	6	99288299		N_Shore	++++	++++	0.00129195	0.203399	0	0	0
cg09063149	1	151882779	THEM4	S_Shore	++++	++++	0.00129457	1	0	0	0
cg12797684	4	188149410			++++	++++	0.00129949	0.116865	0	0	0
cg01222324	10	135050630	VENTX	Island	++++	++++	0.00130342	1	0	0	0
cg17814047	7	560788	PDGFA;PDGFA	Island	++++	++++	0.00131916	0.136081	0	0	0
cg23419635	4	180980684		S_Shore	++++	++++	0.00133031	1	0	0	0
cg21573200	5	2739602		Island	++++	++++	0.00134179	1	0	0	0
cg09467501	17	42083193	PYY;NAGS	Island	++++	++-+	0.00136146	1	0	0	0
cg19026977	5	172999989			++++	++++	0.0013795	1	0	0	0
cg12059112	1	181287684		Island	++++	++++	0.00138605	0.383977	0	0	0
cg15814717	6	29521228		Island	++++	++++	0.00138737	0.134638	0	0	0
cg20074395	20	1246715	SNPH	Island	++++	++++	0.00140704	0.0616133	0	0	0
cg02409108	11	79152112	ODZ4	Island	++++	++++	0.00141032	0.230943	0	0	0
cg20688289	7	100612865	MUC12	S_Shelf	++++	++++	0.00141655	0.127457	0	0	0
cg16924616	7	96653617	DLX5	Island	++++	++++	0.00143163	0.256028	0	0	0
cg09376680	3	87040426	VGLL3	Island	++++	++++	0.00145196	1	0	0	0
cg02055132	3	96533295	EPHA6	Island	++++	++++	0.00145229	0.0770905	0	0	0
cg00376544	17	6679348	FBXO39	Island	++++	++++	0.00147361	1	0	0	0
cg15202738	19	53636108	ZNF415;ZNF415;ZNF415;ZNF415;ZNF415;ZNF415;ZNF415	Island	++++	++++	0.00147393	1	0	0	0
cg07162571	8	41624841	ANK1;ANK1;ANK1;ANK1;ANK1	Island	++++	++++	0.00149164	1	0	0	0
cg26143719	22	37584227	C1QTNF6;C1QTNF6		++++	++++	0.00150443	1	0	0	0
cg14615336	1	50489567	AGBL4;AGBL4	Island	++++	++++	0.00150672	1	0	0	0
cg22647546	2	26394518	FAM59B	N_Shore	++++	++-+	0.00152082	1	0	0	0
cg26518100	18	18823509	GREB1L	S_Shore	++++	++-+	0.00153787	1	0	0	0
cg04662983	17	56834321	PPM1E	S_Shore	++++	++++	0.00153984	1	0	0	0
cg14482308	2	18059109	KCNS3	Island	++++	++++	0.00155197	0.0547929	0	0	0
cg23500122	3	172167610	GHSR;GHSR	Island	++++	++++	0.00155722	0.131687	0	0	0
cg26682094	1	50489714	AGBL4	Island	++++	++++	0.00155788	1	0	0	0
cg01606885	5	53765871			++++	++++	0.00156214	0.369221	0	0	0
cg08055663	16	2737356	KCTD5		++++	++++	0.00156312	1	0	0	0
cg14587524	19	38183262	ZNF781	Island	++++	++++	0.00156312	0.533501	0	0	0
cg04663790	2	121199817		Island	++++	++-+	0.00156837	1	0	0	0
cg15149655	2	98703698	VWA3B;VWA3B	Island	++++	++-+	0.00157427	0.174937	0	0	0
cg27365825	2	18059130	KCNS3	Island	++++	++++	0.00157722	0.201399	0	0	0
cg18099189	4	54960259		S_Shore	++++	++++	0.00158804	1	0	0	0
cg26813646	10	50817651	SLC18A3;CHAT	Island	++++	++++	0.00160969	0.0592196	0	0	0
cg14361409	14	104584098		Island	++++	++++	0.00162018	0.367909	0	0	0
cg03772350	14	38061458	FOXA1	Island	++++	++-+	0.00162444	1	0	0	0
cg04142323	5	87981449	LOC645323	S_Shore	++++	++++	0.00164018	0.160673	0	0	0
cg13781843	4	87515480	PTPN13;PTPN13;PTPN13;PTPN13;PTPN13;PTPN13;PTPN13;PTPN13	Island	++++	++++	0.00164182	0.446279	0	0	0
cg19346645	4	141490153	UCP1	Island	++++	++++	0.00164674	1	0	0	0
cg12373084	9	12775700	C9orf150;C9orf150	Island	++++	++++	0.00165362	0.0760412	0	0	0
cg21449170	7	130419062	KLF14	Island	++++	++++	0.00167035	1	0	0	0
cg24880056	18	31158234	ASXL3		++++	++-+	0.00167068	1	0	0	0
cg00688963	3	24536231	THRB;THRB;THRB;THRB;THRB;THRB	Island	++++	++++	0.00167855	0.217795	0	0	0
cg02332982	12	45444420	DBX2	Island	++++	++++	0.00167986	1	0	0	0
cg22549558	5	9546335	SEMA5A	Island	++++	++++	0.0016874	1	0	0	0
cg17410236	14	85996495	FLRT2;FLRT2	Island	++++	++++	0.00169724	0.0869932	0	0	0
cg19744587	3	53880376	IL17RB;CHDH;CHDH	Island	++++	++++	0.00170281	1	0	0	0
cg02738617	2	58023996			++++	++++	0.00171265	0.0713849	0	0	0
cg18961681	7	32467657		Island	++++	++++	0.00176577	0.210351	0	0	0
cg16986494	3	61237206	FHIT;FHIT	Island	++++	++++	0.00178118	0.689584	0	0	0
cg07380705	5	76249897	CRHBP	Island	++++	++++	0.00181233	0.0792874	0	0	0
cg15724256	2	119602857	EN1	Island	++++	++++	0.00181266	0.334463	0	0	0
cg08668551	11	126873181		Island	++++	+++-	0.00181397	1	0	0	0
cg07093825	14	69728392	GALNTL1;GALNTL1	Island	++++	++++	0.0018225	0.0730572	0	0	0
cg20405017	17	50235393	CA10;CA10;CA10;CA10	Island	++++	++++	0.00182709	0.0998799	0	0	0
cg07088882	11	8038043		N_Shelf	++++	++++	0.00183266	0.893869	0	0	0
cg23142394	12	72665771	LOC283392;TRHDE;LOC283392	Island	++++	++++	0.00185168	1	0	0	0
cg05057720	14	38724675	CLEC14A	Island	++++	++-+	0.00186447	1	0	0	0
cg13140564	20	44540827	PLTP;PLTP	Island	++++	++++	0.00187824	1	0	0	0
cg08448665	21	40984780	C21orf88;C21orf88		++++	++++	0.00188152	1	0	0	0
cg17198929	4	93226889	GRID2	Island	++++	++++	0.00188742	1	0	0	0
cg20232102	19	38747174	PPP1R14A	Island	++++	++++	0.00191169	1	0	0	0
cg18063312	5	72740737		Island	++++	++++	0.00191267	0.576457	0	0	0
cg15745900	8	68864549	PREX2;PREX2	N_Shore	++++	++-+	0.00192546	1	0	0	0
cg00674706	6	29521145		Island	++++	++++	0.00192546	1	0	0	0
cg05759718	1	50489596	AGBL4;AGBL4	Island	++++	++++	0.00192611	0.946662	0	0	0
cg04454951	7	49813031	VWC2	Island	++++	++++	0.0019389	0.230976	0	0	0
cg04991805	10	99790910	CRTAC1	Island	++++	++++	0.00196579	1	0	0	0
cg07363855	1	2984470	PRDM16;PRDM16;FLJ42875;FLJ42875	Island	++++	++++	0.00196776	0.547929	0	0	0
cg06298519	10	118031864	GFRA1;GFRA1;GFRA1	Island	++++	++++	0.00198481	1	0	0	0
cg03250019	18	5197066	LOC642597;LOC642597	Island	++++	++++	0.00198612	1	0	0	0
cg04053392	6	168720505	DACT2	S_Shore	++++	++++	0.0019871	1	0	0	0
cg19949955	14	33402443		Island	++++	++++	0.00198973	1	0	0	0
cg01718116	2	115919829	DPP10;DPP10	Island	++++	++++	0.0020153	0.274981	0	0	0
cg04494873	5	72677287		Island	++++	++++	0.00203465	0.871571	0	0	0
cg00405069	1	52455390	RAB3B	N_Shore	++++	++++	0.00204088	0.0623675	0	0	0
cg26257822	10	119292547	EMX2OS	N_Shore	++++	++++	0.00204482	1	0	0	0
cg24975222	3	45187717	CDCP1;CDCP1	Island	++++	++++	0.0020458	1	0	0	0
cg13209481	14	36973483	SFTA3	Island	++++	++++	0.00204613	1	0	0	0
cg19518308	2	11622904		Island	++++	++++	0.00205137	1	0	0	0
cg22177286	2	231728967	ITM2C;ITM2C;ITM2C	N_Shore	++++	++++	0.00205596	1	0	0	0
cg04297457	16	15983123	C16orf63	S_Shore	++++	++++	0.00205892	0.238256	0	0	0
cg12938020	2	177027075		N_Shore	++++	++++	0.00214188	0.0512843	0	0	0
cg17429000	5	76936636		Island	++++	++++	0.00215138	1	0	0	0
cg02149189	6	29521138		Island	++++	++++	0.00215138	1	0	0	0
cg09493505	7	49813111	VWC2	Island	++++	++++	0.00215434	0.108701	0	0	0
cg15443202	12	67197851			++++	++++	0.00216778	0.285835	0	0	0
cg14459130	2	175199646	SP9	Island	++++	++++	0.00218418	1	0	0	0
cg03698948	6	39760092	DAAM2	Island	++++	++++	0.00219664	1	0	0	0
cg21549299	21	40984760	C21orf88;C21orf88		++++	++++	0.00220024	1	0	0	0
cg02864757	16	51184583	SALL1;SALL1	Island	++++	++++	0.00222024	1	0	0	0
cg22150661	8	104032860	ATP6V1C1	N_Shore	++++	++++	0.00223467	1	0	0	0
cg11857320	4	85424195		S_Shore	++++	++++	0.00225599	0.934529	0	0	0
cg07981328	1	21724633			++++	++++	0.00226779	1	0	0	0
cg25260176	12	57569940	LRP1	Island	++++	++++	0.00226812	0.206515	0	0	0
cg09489306	19	44203913		Island	++++	++++	0.0022691	0.297246	0	0	0
cg00402417	13	100649423		Island	++++	++-+	0.00229435	1	0	0	0
cg14459046	5	173728459			++++	++++	0.00230583	0.317379	0	1	1
cg20176349	4	168155222	SPOCK3;SPOCK3	Island	++++	++++	0.00232419	1	0	0	0
cg17446654	11	111848164	DIXDC1;DIXDC1;DIXDC1	Island	++++	++++	0.00232911	1	0	0	0
cg05316043	10	83634974	NRG3;NRG3	Island	++++	++++	0.00233567	1	0	0	0
cg08428188	16	85363174		Island	++++	++-+	0.00237108	1	0	0	0
cg15598120	5	157001591	ADAM19	Island	++++	++++	0.00237206	0.0517762	0	0	0
cg06724588	16	51185459	SALL1;SALL1	Island	++++	++++	0.0023737	0.409225	0	0	0
cg14190151	2	14778017	FAM84A	S_Shelf	++++	++++	0.00238649	0.10411	0	0	0
cg08314300	2	162278173	TBR1	N_Shore	++++	++-+	0.00241338	1	0	0	0
cg17336584	6	12750256	PHACTR1	Island	++++	++++	0.00242191	1	0	0	0
cg09805010	3	24536077	THRB;THRB;THRB	Island	++++	++++	0.00243797	1	0	0	0
cg08056146	8	10588013	SOX7;SOX7	Island	++++	++++	0.00243961	1	0	0	0
cg01540949	11	126736629	KIRREL3;KIRREL3		++++	++++	0.00245175	1	0	0	0
cg03287340	19	50651195		Island	++++	++++	0.00246486	0.763691	0	0	0
cg02886578	1	153176083	LELP1		++++	++++	0.00249864	1	0	0	0
cg08688629	10	134972932	KNDC1	N_Shore	++++	++++	0.00250487	1	0	0	0
cg08937573	15	96865294		Island	++++	++++	0.00251044	0.415456	0	0	0
cg03431846	14	24641183	REC8;REC8	Island	++++	++++	0.00255668	1	0	0	0
cg13933293	3	184301826		Island	++++	++++	0.00256487	1	0	0	0
cg27510832	1	76080684		Island	++++	++++	0.00257438	1	0	0	0
cg10098541	3	122785650	PDIA5;PDIA5	N_Shore	++++	++++	0.00257766	0.342661	0	0	0
cg26255052	1	23038321	EPHB2;EPHB2	Island	++++	++++	0.00258422	0.173658	0	0	0
cg01049530	4	81952008	BMP3	Island	++++	-+++	0.0025957	1	0	0	0
cg02773436	10	50650248			++++	++++	0.00259734	0.299082	0	0	0
cg05835105	4	111543401	PITX2;PITX2;PITX2	Island	++++	++++	0.00259996	1	0	0	0
cg10025443	9	93564339	SYK;SYK;SYK	Island	++++	++++	0.00261307	1	0	0	0
cg16208357	17	40932520	WNK4	Island	++++	++++	0.0026239	1	0	0	0
cg18485193	5	16936369	MYO10;MYO10	Island	++++	++++	0.00264062	1	0	0	0
cg21104965	6	117869453	DCBLD1	Island	++++	++++	0.00265013	1	0	0	0
cg09820011	10	118765125	KIAA1598;KIAA1598	Island	++++	++++	0.00265078	1	0	0	0
cg24502904	12	53399544	EIF4B	N_Shore	++++	++++	0.00265242	1	0	0	0
cg27650434	1	40368189	MYCL1;MYCL1;MYCL1	Island	++++	++++	0.00267538	1	0	0	0
cg10956096	10	133119658			++++	++++	0.00269636	0.616461	0	0	0
cg13796804	4	66536196	EPHA5;EPHA5	Island	++++	++++	0.00271177	1	0	0	0
cg20296532	2	120282272	SCTR	S_Shore	++++	++++	0.00274293	1	0	0	0
cg27302539	14	54413548		Island	++++	++++	0.00275965	0.129424	0	0	0
cg22089361	17	52600604			++++	++-+	0.00284064	1	0	0	0
cg18556834	14	24641070	REC8;REC8	Island	++++	++-+	0.00287048	1	0	0	0
cg02790305	4	186732932	SORBS2;SORBS2;SORBS2;SORBS2;SORBS2;SORBS2;SORBS2		++++	++-+	0.00288294	1	0	0	0
cg14168055	4	4851051		N_Shelf	++++	++++	0.00288786	0.0530878	0	0	0
cg15950068	6	84418659	SNAP91;SNAP91	Island	++++	++-+	0.00291671	1	0	0	0
cg03194122	4	7437027	SORCS2;PSAPL1		++++	++++	0.00299836	1	0	0	0
cg26902216	8	120220410	MAL2	Island	++++	++++	0.00300427	1	0	0	0
cg03340215	15	83315615	CPEB1	Island	++++	++++	0.00301377	0.867637	0	0	0
cg02963878	20	61978070	CHRNA4	Island	++++	++++	0.00302689	0.138081	0	0	0
cg01727105	2	85596697	ELMOD3;ELMOD3;ELMOD3;ELMOD3		++++	++++	0.00303476	0.178938	0	0	0
cg17855264	15	37180636		S_Shore	++++	++++	0.00305706	1	0	0	0
cg21314480	2	75427945	TACR1;TACR1	Island	++++	++++	0.00306493	1	0	0	0
cg12483476	5	178421711	GRM6	Island	++++	++++	0.0030728	1	0	0	0
cg01875596	18	22933696	ZNF521	S_Shelf	++++	++++	0.00308755	1	0	0	0
cg00662956	3	185829300		S_Shelf	++++	++++	0.00309411	0.240486	0	0	0
cg07607008	7	47621905		S_Shore	++++	++++	0.00310067	1	0	0	0
cg20170028	11	70917283	SHANK2		++++	++-+	0.00310723	0.116505	0	0	0
cg18290848	7	89950671		Island	++++	++++	0.00311411	0.328561	0	0	0
cg10848792	2	62732892	TMEM17	Island	++++	++++	0.00311674	1	0	0	0
cg06002370	2	228029452	COL4A3;COL4A3;COL4A3;COL4A3;COL4A4	Island	++++	++++	0.00313346	0.19071	0	0	0
cg16404157	14	38724648	CLEC14A	Island	++++	++++	0.00314035	1	0	0	0
cg13149307	10	20104452	PLXDC2	Island	++++	++++	0.00317379	1	0	0	0
cg11850773	18	904963	ADCYAP1;ADCYAP1;ADCYAP1	Island	++++	++++	0.00318592	1	0	0	0
cg16474170	18	7566781	PTPRM;PTPRM	Island	++++	++++	0.00318986	1	0	0	0
cg09388605	8	56013800	XKR4	Island	++++	++++	0.00320822	1	0	0	0
cg19861741	5	170742608		Island	++++	++++	0.00322363	0.785988	0	0	0
cg02344833	19	58545285	ZSCAN1	Island	++++	++++	0.00322757	1	0	0	0
cg07507755	16	84402158	ATP2C2;ATP2C2	Island	++++	++++	0.00322888	1	0	0	0
cg24118715	10	70232072	DNA2	S_Shore	++++	++++	0.00323609	0.634168	0	0	0
cg15921949	3	137486213		N_Shore	++++	++-+	0.00327807	1	0	0	0
cg05587419	12	110270636	TRPV4;TRPV4	N_Shore	++++	++++	0.00328561	0.0845995	0	0	0
cg08762432	10	21358991	NEBL		++++	++++	0.00329217	0.195431	0	0	0
cg23323203	11	117688338			++++	++++	0.0033184	0.0909936	0	0	0
cg10772290	20	48184421	PTGIS	Island	++++	++++	0.00332496	1	0	0	0
cg15247245	3	96168838			++++	++++	0.00334135	1	0	1	0
cg20994660	2	162272299	TBR1	N_Shore	++++	++++	0.00334791	1	0	0	0
cg15709235	3	79068292	ROBO1;ROBO1;ROBO1;ROBO1;ROBO1;ROBO1;ROBO1	Island	++++	++++	0.00335447	0.492841	0	0	0
cg16512615	4	141490351	UCP1	Island	++++	++++	0.00336758	1	0	0	0
cg03938432	6	69345836	BAI3;BAI3	S_Shore	++++	++++	0.00337742	1	0	0	0
cg18448581	18	70534767	NETO1;NETO1	Island	++++	++++	0.00337742	1	0	0	0
cg13734410	11	47207390	PACSIN3	Island	++++	++++	0.00338726	1	0	0	0
cg25282715	17	42848988	ADAM11	N_Shelf	++++	-+++	0.00341349	1	0	0	0
cg19579167	18	5543878	EPB41L3	Island	++++	++++	0.00345612	0.0670238	0	0	0
cg12533363	5	57756026	PLK2	Island	++++	++++	0.00347907	0.59941	0	0	0
cg22458194	11	113345686	DRD2;DRD2	Island	++++	++++	0.00349219	1	0	0	0
cg22840361	15	96887919		Island	++++	++++	0.00350203	1	0	0	0
cg00596508	12	41086800	CNTN1;CNTN1	Island	++++	++++	0.00352498	1	0	0	0
cg10094616	8	53478023	FAM150A	Island	++++	++++	0.00355121	1	0	0	0
cg05191313	5	118747345			++++	++++	0.00355121	0.0537764	0	0	0
cg05183931	11	17717588		Island	++++	++++	0.00356761	0.0982075	0	0	0
cg16929104	19	18496953	GDF15	N_Shore	++++	++++	0.00361679	0.0577113	0	0	0
cg18136932	5	7851231	C5orf49;C5orf49	Island	++++	++++	0.00362007	1	0	0	0
cg22574825	13	29068987	FLT1;FLT1;FLT1;FLT1;FLT1;FLT1;FLT1;FLT1	Island	++++	++++	0.00362007	1	0	0	0
cg23546474	2	223163033	PAX3;PAX3;PAX3;CCDC140;CCDC140;PAX3;PAX3;PAX3;PAX3;PAX3	Island	++++	++++	0.00362007	1	0	0	0
cg17619823	8	37823475	ADRB3	Island	++++	++++	0.00362007	0.0517434	0	0	0
cg10964367	8	1771973	ARHGEF10	Island	++++	++++	0.00363647	0.529567	0	0	0
cg13466694	9	129380728	LMX1B	S_Shelf	++++	++++	0.0036463	1	0	0	0
cg20611911	1	3567930	TP73;WDR8	Island	++++	++++	0.00367254	1	0	0	0
cg20322876	11	111170104	C11orf93;C11orf93;C11orf92	Island	++++	++++	0.00369877	0.286163	0	0	0
cg02108850	3	154797867	MME;MME;MME;MME	Island	++++	++++	0.00373484	1	0	0	0
cg23425316	14	73706449	PAPLN	Island	++++	++++	0.0037414	1	0	0	0
cg17832991	20	18039927	OVOL2	Island	++++	++-+	0.00375123	1	0	0	0
cg08739433	1	113051925	WNT2B;WNT2B	Island	++++	++++	0.00375123	0.327315	0	0	0
cg26902127	16	88513285		Island	++++	++++	0.00375779	0.0816483	0	0	0
cg15988350	7	32110650	PDE1C	Island	++++	++++	0.00376435	1	0	0	0
cg24459147	21	38068581		Island	++++	++++	0.00381681	1	0	0	0
cg18959478	11	6341349	PRKCDBP	Island	++++	++++	0.00382009	1	0	0	0
cg09306186	16	73081722	ZFHX3;ZFHX3;ZFHX3	Island	++++	++++	0.00384305	1	0	0	0
cg18407136	15	83681092	C15orf40;C15orf40;C15orf40;C15orf40;C15orf40;C15orf40;C15orf40	S_Shore	++++	++++	0.00385616	0.162739	0	0	1
cg04529193	4	649901	PDE6B;PDE6B;PDE6B	N_Shore	++++	++-+	0.00389879	1	0	0	0
cg26817546	5	135538704			++++	++++	0.00390535	1	0	0	0
cg18184411	1	53309261	ZYG11A	Island	++++	++-+	0.00390535	0.197169	0	0	0
cg16712472	21	35747390	FAM165B	Island	++++	++++	0.00391191	1	0	0	1
cg10120816	6	99296305		Island	++++	++-+	0.00395453	1	0	0	0
cg05565052	22	38669495	TMEM184B	S_Shore	++++	++++	0.00396765	1	0	0	0
cg10908460	2	176950736		Island	++++	++++	0.00400044	0.0866653	0	0	0
cg07599979	21	38592612	DSCR9	N_Shore	++++	++++	0.00401356	1	0	0	0
cg27659787	4	111544291	PITX2;PITX2;PITX2	Island	++++	++++	0.00402995	0.129588	0	0	0
cg19335742	15	40566880	PAK6;PAK6;PAK6		++++	++-+	0.00404307	0.0545306	0	0	0
cg01192900	11	111383668	MIR34B;BTG4;MIR34C	Island	++++	++++	0.00406602	0.130801	0	0	0
cg13470462	3	112965787	BOC		++++	-+-+	0.00410865	1	0	0	0
cg01104047	5	136834155	SPOCK1	Island	++++	++++	0.00411193	0.382665	0	0	0
cg07136998	5	168728081	SLIT3;SLIT3	Island	++++	++++	0.00411521	0.0866653	0	0	0
cg18815943	1	47882314	FOXE3	Island	++++	++++	0.00412177	1	0	0	0
cg12496156	2	218666048	TNS1		++++	++++	0.00412832	1	0	0	0
cg01262290	7	142748458	OR6V1		++++	++-+	0.00414144	1	0	0	0
cg05238375	10	112836780	ADRA2A	Island	++++	++-+	0.00414144	1	0	0	0
cg02690638	10	83635375	NRG3;NRG3	Island	++++	++++	0.00415456	1	0	0	0
cg20060206	12	16758713	LMO3;LMO3		++++	++++	0.00416111	1	0	0	0
cg10253457	15	101460077	LRRK1	Island	++++	++++	0.00416439	0.218844	0	0	0
cg15510664	4	54611126			++++	++++	0.00421686	0.0821074	0	0	0
cg01949993	1	183155116	LAMC2;LAMC2		++++	++++	0.00423981	0.175298	0	0	0
cg17546478	3	184322189		Island	++++	++++	0.00426604	1	0	0	0
cg18144593	2	71116411		Island	++++	++++	0.00429883	1	0	0	0
cg22871318	12	42982419	PRICKLE1	N_Shore	++++	++++	0.00433818	1	1	0	0
cg15305538	2	131484486		N_Shore	++++	++++	0.00434802	0.346268	0	0	0
cg05071383	14	105370983		N_Shore	++++	++++	0.00436769	0.118538	0	0	0
cg26442852	11	2431603	TRPM5	N_Shelf	++++	++++	0.00437425	1	0	0	0
cg04885072	12	16513009	MGST1;MGST1;MGST1;MGST1		++++	++-+	0.00438737	1	0	0	0
cg03654783	1	156634034			++++	++++	0.00439721	0.965024	0	0	0
cg05142982	8	495736	C8orf42	Island	++++	++++	0.00441032	0.134507	0	0	0
cg04961582	14	95239464		Island	++++	++++	0.00443328	0.539076	0	0	0
cg13738299	13	46189906	FAM194B		++++	++++	0.00444967	1	0	0	0
cg13997645	11	15136475	INSC;INSC	Island	++++	++++	0.00448574	0.0643678	0	0	0
cg15683295	7	27245542		S_Shore	++++	++++	0.00449558	1	0	0	0
cg00893471	2	177029921	HOXD3	Island	++++	++++	0.00451525	1	0	0	0
cg22963554	15	79724739	KIAA1024	Island	++++	++++	0.00453821	0.323609	0	0	0
cg25842285	10	101089972	CNNM1	Island	++++	++++	0.00454148	1	0	0	0
cg25185173	4	154712580		Island	++++	++-+	0.00454476	1	0	0	0
cg19907305	19	18902117	COMP	Island	++++	++++	0.00455132	0.508253	0	0	0
cg01759114	8	56494607			++++	++++	0.00458083	1	0	0	0
cg07516252	14	24641201	REC8;REC8	Island	++++	++++	0.00459067	0.316166	0	0	0
cg27316886	12	3600106	PRMT8	Island	++++	++++	0.00461034	0.539076	0	0	0
cg23693169	1	14219481		Island	++++	++++	0.00463002	1	0	0	0
cg19079194	2	213403321	ERBB4;ERBB4;ERBB4;ERBB4	Island	++++	++++	0.00464969	1	0	0	0
cg01719405	14	62401258			++++	++++	0.00464969	1	0	0	0
cg03506640	14	85997753	FLRT2	Island	++++	++++	0.00465625	1	0	0	0
cg02077276	11	14993977	CALCA;CALCA;CALCA	N_Shore	++++	++++	0.00466281	1	0	0	0
cg18885210	2	121516533			++++	++++	0.00466937	0.213597	0	0	0
cg04236178	1	217310572	ESRRG	N_Shore	++++	++++	0.0046792	1	0	0	0
cg05595345	15	98504173	ARRDC4	Island	++++	++++	0.00470544	1	0	0	0
cg13436155	13	100644217		S_Shore	++++	++++	0.00471855	0.576785	0	0	0
cg02071243	4	186049926		Island	++++	++++	0.00472839	1	0	0	0
cg19052064	17	48278952	COL1A1;COL1A1	Island	++++	++++	0.00476118	1	0	0	0
cg08582485	20	22557518	C20orf56	Island	++++	++-+	0.00476446	1	0	0	0
cg21782409	4	96470887	UNC5C	Island	++++	++++	0.00479725	1	0	0	0
cg18563899	7	97875333	TECPR1		++++	++-+	0.00487923	1	0	0	0
cg11060276	8	57359414	PENK;PENK	Island	++++	++++	0.00488578	1	0	0	0
cg18517195	15	71184476	LRRC49;THAP10	Island	++++	++++	0.00489562	1	0	0	0
cg06660523	4	30722152	PCDH7;PCDH7;PCDH7;PCDH7;PCDH7;PCDH7	Island	++++	++++	0.0048989	1	0	0	0
cg02631199	16	50502411		S_Shore	++++	++++	0.0048989	1	0	0	0
cg00055359	2	134023210	NCKAP5;NCKAP5	N_Shore	++++	++++	0.00493169	0.4148	0	0	0
cg09559021	1	34630518	CSMD2	Island	++++	++++	0.00493825	0.252552	0	0	0
cg22813950	12	130645566	FZD10	Island	++++	++++	0.00494153	0.371188	0	0	0
cg21474897	3	170136489	CLDN11	Island	++++	++++	0.00494481	1	0	0	0
cg15309006	16	23766116	CHP2;CHP2	Island	++++	++-+	0.00495137	0.289081	0	0	0
cg26963271	1	66259081	PDE4B;PDE4B	S_Shore	++++	++++	0.00500055	0.617445	0	0	0
cg00884093	22	46932648	CELSR1	Island	++++	++++	0.00501367	1	0	0	0
cg23337382	4	22517965	GPR125	Island	++++	++++	0.00504318	1	0	0	0
cg06118571	1	6137768	KCNAB2;KCNAB2		++++	+++-	0.00504646	1	0	0	0
cg24617696	2	121104312	INHBB	Island	++++	++++	0.00505957	1	0	0	0
cg25432294	2	67282212			++++	++++	0.00506285	1	0	0	0
cg25209842	10	103536342	FGF8;FGF8;FGF8;FGF8	Island	++++	++++	0.00509564	0.0500383	0	0	0
cg02812207	4	119273827	PRSS12	Island	++++	++++	0.0051186	0.749263	0	0	0
cg02824202	18	6729810		Island	++++	++++	0.00513827	0.831567	0	0	0
cg25768734	7	27152583	HOXA3;HOXA3;HOXA3	N_Shore	++++	++++	0.00514811	0.263209	0	0	0
cg09912350	4	156588326	GUCY1A3;GUCY1A3;GUCY1A3;GUCY1A3;GUCY1A3;GUCY1A3;GUCY1A3;GUCY1A3;GUCY1A3	Island	++++	++++	0.00515795	1	0	0	0
cg23270113	19	45417587	APOC1		++++	++-+	0.00518418	1	0	0	0
cg11789740	15	33602824	RYR3	Island	++++	++++	0.00518746	1	0	0	0
cg21133153	6	29521488		Island	++++	++++	0.00518746	1	0	0	0
cg21169203	11	111847968	DIXDC1;DIXDC1	Island	++++	++++	0.00518746	0.509564	0	0	0
cg25649641	15	76635357		Island	++++	++++	0.00523664	0.0613182	0	0	0
cg09641089	15	25021305		S_Shelf	++++	++++	0.00528911	0.0605968	0	0	0
cg11867257	5	89854334	GPR98;GPR98	Island	++++	++++	0.00529239	1	0	0	0
cg12071328	11	20690930	NELL1;NELL1	Island	++++	++++	0.00529894	1	0	0	0
cg06411724	7	15725477	MEOX2		++++	++++	0.0053055	1	0	0	0
cg17457560	8	32405851	NRG1;NRG1;NRG1;NRG1;NRG1;NRG1;NRG1;NRG1;NRG1;NRG1;NRG1;NRG1;NRG1;NRG1;NRG1;NRG1;NRG1;NRG1;NRG1;NRG1;NRG1;NRG1;NRG1	Island	++++	++++	0.00538748	0.981748	0	0	0
cg27567401	6	75915782	COL12A1;COL12A1	Island	++++	+++-	0.00546618	1	0	0	0
cg12034383	7	155250299	EN2	Island	++++	++++	0.00547273	0.187693	0	0	0
cg23244488	7	19146032		Island	++++	++++	0.0055088	0.250618	0	0	0
cg21565421	15	74592665	CCDC33		++++	++++	0.00551864	1	0	0	0
cg06241901	6	43244304	TTBK1	Island	++++	++++	0.0055252	1	0	1	0
cg13794993	18	76740284	SALL3	Island	++++	++++	0.00555799	1	0	0	0
cg16051685	1	26394083	TRIM63;TRIM63		++++	++++	0.00557439	0.194513	0	0	0
cg07042729	15	27184849	GABRA5;GABRA5		++++	++++	0.00557766	1	0	0	0
cg17174980	12	14109514	GRIN2B		++++	++++	0.00561701	1	0	0	0
cg02711397	19	39360313	RINL	Island	++++	++-+	0.00562029	0.910264	0	0	0
cg14635466	8	101661245	SNX31	N_Shore	++++	++++	0.00569571	0.0619413	0	0	1
cg00437985	16	21295255	CRYM	Island	++++	++++	0.00569899	1	0	0	0
cg08762247	17	53800372	TMEM100;TMEM100		++++	++++	0.00570883	0.0949941	0	0	0
cg26468007	7	4998714	MMD2;MMD2;MMD2;MMD2	Island	++++	++++	0.00573178	1	0	0	0
cg23521973	10	125117429			++++	++++	0.00577441	1	0	0	0
cg22022379	19	50762277	MYH14;MYH14;MYH14	N_Shore	++++	++++	0.00580392	0.364302	0	0	0
cg12188986	11	93063886	CCDC67;CCDC67	Island	++++	++++	0.0058072	1	0	0	0
cg12350474	17	46578476			++++	++++	0.00583999	1	0	0	0
cg26715952	6	62996119	KHDRBS2	Island	++++	++++	0.00586294	1	0	0	0
cg06599677	5	178322856	ZFP2	Island	++++	++++	0.00587278	1	0	0	0
cg11280525	5	87955695	LOC645323	Island	++++	++++	0.00587606	1	0	0	0
cg26584545	12	96183197	NTN4	N_Shore	++++	++++	0.00587606	1	0	0	0
cg13822849	9	137999757	OLFM1	S_Shelf	++++	++++	0.00587934	0.105487	0	0	0
cg00901320	12	129338534	GLT1D1	Island	++++	++++	0.00590229	1	0	0	0
cg07493516	4	54957554		N_Shore	++++	++++	0.00592524	1	0	0	0
cg15996043	14	70346221	SMOC1;SMOC1;SMOC1;SMOC1	Island	++++	++++	0.00595148	1	0	0	0
cg16009877	12	65445111	WIF1		++++	++++	0.00598427	1	0	0	0
cg04384123	16	24264559		N_Shelf	++++	++-+	0.00598427	1	0	0	0
cg07091412	1	20810651	CAMK2N1	Island	++++	++++	0.00606624	0.700733	0	0	0
cg27642784	3	157813670		N_Shore	++++	+-++	0.00606952	1	0	0	0
cg11382055	1	233749410	KCNK1	Island	++++	++++	0.00620724	1	0	0	0
cg26157385	1	248020641	TRIM58	Island	++++	++++	0.00621708	1	0	0	0
cg17610800	7	27281561	EVX1	N_Shore	++++	++++	0.00625971	0.159919	0	0	0
cg24642825	15	89248793			++++	++++	0.00629906	0.138507	0	0	0
cg26811372	5	140772182	PCDHGA4;PCDHGA6;PCDHGA1;PCDHGA5;PCDHGB1;PCDHGB4;PCDHGA3;PCDHGA8;PCDHGA2;PCDHGA8;PCDHGA7;PCDHGB2;PCDHGA8;PCDHGA8;PCDHGB3	N_Shore	++++	++++	0.00630233	1	0	0	0
cg23629166	1	2345368	PEX10;PEX10	N_Shore	++++	++++	0.00633185	0.0611871	0	0	1
cg26218698	11	67896080		Island	++++	++++	0.0063548	1	0	0	0
cg17886399	3	62362660		Island	++++	++++	0.00639415	1	0	0	0
cg26972272	14	57283582	OTX2OS1	N_Shore	++++	++++	0.00641054	0.722375	0	0	0
cg01664666	1	242687465	PLD5	Island	++++	++++	0.00641054	0.417095	0	0	0
cg13566610	7	103630083	RELN;RELN	Island	++++	++++	0.00643022	1	0	0	0
cg06641388	1	12655240	DHRS3	N_Shore	++++	++++	0.00643022	1	0	0	0
cg06419964	17	34965294	MRM1		++++	++++	0.00644005	0.111586	0	0	0
cg24318032	17	39624088	KRT32		++++	++-+	0.00645317	1	0	0	0
cg20926035	2	45236630	SIX2	Island	++++	++++	0.00645645	1	0	0	0
cg14745270	8	110703888	GOLSYN;GOLSYN;GOLSYN;GOLSYN	Island	++++	++++	0.00646957	1	0	0	0
cg00387704	3	189838376	LEPREL1;LEPREL1	Island	++++	++++	0.0064794	0.181233	0	0	0
cg19880942	8	69672404	C8orf34		++++	++-+	0.00660073	0.255536	0	0	0
cg13491250	2	20068484		Island	++++	++-+	0.00668926	1	0	0	0
cg24667625	3	145968722	PLSCR4;PLSCR4;PLSCR4;PLSCR4	Island	++++	++++	0.00671549	0.0855176	0	0	0
cg14658067	7	1273394	UNCX	Island	++++	++++	0.00674501	1	0	0	0
cg25987194	7	107301566	SLC26A4;LOC286002	Island	++++	++++	0.00679419	1	0	0	0
cg07683388	2	198029332	ANKRD44	Island	++++	++++	0.00680403	1	0	0	0
cg10658542	12	33592642	SYT10;SYT10	Island	++++	++++	0.00680731	1	0	0	0
cg26705960	11	100999009	PGR	Island	++++	++++	0.00683682	0.689584	0	0	0
cg06825448	2	240884925			++++	++++	0.00684994	1	0	0	0
cg03709938	1	2560950	MMEL1	Island	++++	++++	0.00685977	1	0	0	0
cg02582387	1	20879813	FAM43B	Island	++++	++++	0.00686305	0.277309	0	0	0
cg26896771	15	37180782		S_Shore	++++	++++	0.00687945	1	0	0	0
cg22550549	19	13123217	NFIX	Island	++++	++++	0.00688928	1	0	0	0
cg08660876	4	154681323	RNF175;RNF175	Island	++++	++++	0.00692535	1	0	0	0
cg07848601	5	170289430	RANBP17	Island	++++	+++-	0.00692535	1	0	0	0
cg10740902	4	55991683	KDR;KDR	Island	++++	++++	0.0069647	0.216975	0	0	0
cg23346945	5	125671946			++++	++++	0.00696798	1	0	0	0
cg22658758	5	92935309			++++	++++	0.0069811	0.372172	0	0	0
cg12060499	14	102172296		Island	++++	-+++	0.00704012	1	0	0	0
cg16076038	22	19744078	TBX1;TBX1;TBX1	Island	++++	++++	0.00705652	0.146377	0	0	0
cg00608548	19	40972521	SPTBN4;BLVRB	Island	++++	++++	0.00711226	0.202383	0	0	0
cg24575676	2	180726035	ZNF385B;MIR1258;ZNF385B	Island	++++	++++	0.00713521	0.0754182	0	0	0
cg00327383	8	22019275	SFTPC;SFTPC		++++	++++	0.00714177	0.261504	0	0	0
cg02640041	5	33936520	RXFP3;RXFP3	Island	++++	++++	0.00714177	0.18625	0	0	0
cg04451175	8	16860088	FGF20	S_Shore	++++	++++	0.00714505	1	0	0	0
cg15085086	6	154360894	OPRM1;OPRM1;OPRM1;OPRM1;OPRM1;OPRM1;OPRM1;OPRM1;OPRM1;OPRM1;OPRM1;OPRM1	Island	++++	++++	0.00715161	0.212417	0	0	0
cg04749646	2	217236630	MARCH4;MARCH4	Island	++++	++++	0.00730244	1	0	0	0
cg07746943	3	238615	CHL1	Island	++++	++++	0.007309	0.185529	0	0	0
cg00848728	1	58716018	DAB1;DAB1	Island	++++	++++	0.00734835	1	0	0	0
cg04235075	16	67199830	HSF4;HSF4	Island	++++	++++	0.00745984	1	0	0	0
cg17737681	2	172952136	DLX1;DLX1	Island	++++	++++	0.00750575	0.33971	0	0	0
cg10491628	6	29521220		Island	++++	++++	0.00755493	1	0	0	0
cg07382923	10	48573444			++++	++++	0.00755821	1	0	0	0
cg24378692	3	145878963	PLOD2;PLOD2;PLOD2;PLOD2	Island	++++	++++	0.00755821	0.332824	0	0	0
cg12223582	7	75912349	SRRM3	Island	++++	++++	0.007591	0.494153	0	0	0
cg03209854	5	5140003	ADAMTS16	Island	++++	++++	0.00759756	1	0	0	0
cg19713196	1	201368390	LAD1	N_Shore	++++	++++	0.00761395	0.280883	0	0	0
cg21201924	9	137251825	RXRA	N_Shore	++++	++++	0.00763691	1	0	0	0
cg06507579	7	1282819		Island	++++	++++	0.00765002	0.176347	0	0	0
cg04611812	6	75911956	COL12A1;COL12A1	Island	++++	++++	0.00770905	1	0	0	0
cg25050951	15	30115147	TJP1;TJP1	Island	++++	++++	0.00771888	1	0	0	0
cg23915792	22	41763255	TEF		++++	++++	0.00771888	1	0	0	0
cg07433663	15	37390326	MEIS2;MEIS2;MEIS2;MEIS2;MEIS2;MEIS2;MEIS2	Island	++++	++++	0.00771888	1	0	0	0
cg25939742	19	47746369		Island	++++	++++	0.00772544	1	0	0	0
cg23847109	1	40783060	COL9A2	Island	++++	++++	0.0077484	0.17133	0	0	0
cg13831922	17	12569213	MYOCD;MYOCD;MYOCD;MYOCD	Island	++++	++++	0.00780742	1	0	0	0
cg22125805	12	119212248		Island	++++	++++	0.00789267	0.638759	0	0	0
cg13745402	9	12776218	C9orf150	S_Shore	++++	++++	0.00790907	0.424965	0	0	0
cg24766650	17	46689426	HOXB7	N_Shore	++++	++++	0.0079353	1	0	0	0
cg04597894	4	180980155		Island	++++	++++	0.0079976	1	0	0	0
cg02943578	16	86600499	FOXC2	Island	++++	++++	0.00806646	1	0	0	0
cg20240715	21	35828503	KCNE1;KCNE1;KCNE1;KCNE1	N_Shelf	++++	++-+	0.00808286	1	0	0	0
cg24136314	4	41694736	LIMCH1;LIMCH1;LIMCH1;LIMCH1;LIMCH1		++++	++++	0.00812876	0.0515139	0	0	0
cg13555415	9	134454249	RAPGEF1;RAPGEF1		++++	++++	0.00815828	1	0	0	0
cg04081201	16	86601024	FOXC2	Island	++++	++++	0.00816811	1	0	0	0
cg10159630	2	177037364	HOXD3	S_Shore	++++	++++	0.00818451	0.266095	0	0	0
cg02589672	22	41763128	TEF		++++	++++	0.00823369	1	0	0	0
cg24032710	14	104770459			++++	++-+	0.00825009	1	0	0	0
cg20453845	4	8074092	ABLIM2;ABLIM2;ABLIM2;ABLIM2;ABLIM2;ABLIM2;ABLIM2		++++	++++	0.00826321	0.086239	0	0	0
cg23278196	12	54071111	ATP5G2;ATP5G2	Island	++++	++++	0.00848618	1	0	0	0
cg06283493	3	181417613	SOX2OT	S_Shelf	++++	++++	0.00849274	0.357744	0	0	1
cg16289957	5	14011872		Island	++++	++++	0.0086239	1	0	0	0
cg26381783	9	505235	KANK1	Island	++++	++++	0.00866653	0.563997	0	0	0
cg05417162	15	89959854		Island	++++	++++	0.00867637	1	0	0	0
cg05385163	9	96717349	BARX1	Island	++++	++++	0.00871244	0.0630233	0	0	0
cg19904233	6	153452791	RGS17	Island	++++	++++	0.00871899	1	0	0	0
cg05520409	16	1030619	SOX8	Island	++++	++++	0.00872883	0.120308	0	0	0
cg21245277	2	185463218	ZNF804A;ZNF804A	Island	++++	++++	0.00874195	1	0	0	0
cg20034792	6	29521781		Island	++++	++++	0.00874851	0.880753	0	0	0
cg27014538	18	30353240	KLHL14	S_Shore	++++	++++	0.00877802	0.137228	0	0	0
cg22418909	8	41166738	SFRP1;SFRP1	Island	++++	++++	0.0087813	1	0	0	0
cg05685587	6	1312577	FOXQ1	Island	++++	++++	0.00878457	1	0	0	0
cg07788348	7	122527472	CADPS2;CADPS2;CADPS2	S_Shore	++++	++++	0.00878785	1	0	0	0
cg18794839	1	215256262	KCNK2;KCNK2;KCNK2	Island	++++	++++	0.0088895	1	0	0	0
cg13169011	14	60973462		N_Shore	++++	++++	0.00893541	1	0	0	0
cg01893212	7	49813088	VWC2	Island	++++	++++	0.00904362	1	0	0	0
cg26527457	19	7562425	C19orf45	N_Shelf	++++	++++	0.00906985	1	0	0	0
cg01077058	2	241083864			++++	++++	0.00907969	0.237731	0	0	0
cg13433250	2	63275954	LOC100132215	Island	++++	++++	0.00909936	1	0	0	0
cg05625362	4	166795323	TLL1	Island	++++	++++	0.00911248	1	0	0	0
cg19237294	18	35065236	BRUNOL4;BRUNOL4;BRUNOL4;BRUNOL4	Island	++++	++++	0.00914527	0.10493	0	0	0
cg19426955	2	128422224	LIMS2;LIMS2;LIMS2;LIMS2	S_Shore	++++	+++-	0.0091715	1	0	0	0
cg25571189	2	133427612	LYPD1;LYPD1;LYPD1	Island	++++	++++	0.00919118	1	0	0	0
cg26499286	17	39472498	KRTAP17-1		++++	++++	0.00922069	1	0	0	0
cg25205699	4	37246280	KIAA1239	Island	++++	++++	0.00922069	0.089223	0	0	0
cg19597382	4	147559423	POU4F2	Island	++++	++++	0.00923053	1	0	0	0
cg00620733	17	41723536	MEOX1;MEOX1;MEOX1	Island	++++	++++	0.00923053	1	0	0	0
cg14919250	8	10917293	XKR6	S_Shore	++++	++++	0.00925348	1	0	0	0
cg26343298	8	95960752	TP53INP1;TP53INP1	Island	++++	++++	0.00925348	1	0	0	0
cg22746058	10	23481176	PTF1A	Island	++++	++++	0.00928955	1	0	0	0
cg27110994	4	157892489	PDGFC;PDGFC	N_Shore	++++	++-+	0.00936169	0.295901	0	0	0
cg15139644	18	35065386	BRUNOL4;BRUNOL4;BRUNOL4;BRUNOL4	Island	++++	++++	0.00939448	1	0	0	0
cg11760593	14	38053599		Island	++++	++++	0.00939448	1	0	0	0
cg16620537	5	140306054	PCDHA7;PCDHAC1;PCDHA12;PCDHA6;PCDHA10;PCDHA4;PCDHA11;PCDHAC1;PCDHA8;PCDHA6;PCDHA1;PCDHA2;PCDHA1;PCDHA9;PCDHA13;PCDHA5;PCDHA3;PCDHA10	Island	++++	++++	0.00946006	0.299541	0	0	0
cg07749943	4	3468188	DOK7;DOK7	S_Shelf	++++	++++	0.00947318	1	0	0	0
cg15532149	12	64173363	TMEM5	N_Shore	++++	++++	0.00947973	0.0528583	0	0	0
cg03495868	1	78956905	PTGFR;PTGFR;PTGFR;PTGFR	Island	++++	++++	0.00948629	1	0	0	0
cg04930630	16	86542422		Island	++++	++++	0.00950269	0.173331	0	0	0
cg03332469	7	156796967		Island	++++	++++	0.00959778	1	0	0	0
cg09239106	12	49937997	KCNH3		++++	++++	0.00966664	1	0	1	0
cg09641689	16	54965142	IRX5	Island	++++	++++	0.00966664	0.0777135	0	0	0
cg24514884	6	134639203	SGK1	S_Shore	++++	++++	0.0096732	1	0	0	0
cg04201675	14	95403054			++++	++++	0.00967648	1	0	0	0
cg25806307	19	39466182	FBXO17	Island	++++	++++	0.00976501	0.26498	0	0	0
cg08382774	10	134600491	NKX6-2	Island	++++	++++	0.00977485	1	0	0	0
cg14354327	10	131763676		Island	++++	++++	0.00977485	1	0	0	0
cg20339230	15	92937360	ST8SIA2	Island	++++	++++	0.00978469	1	0	0	0
cg27338302	16	1271505	CACNA1H;CACNA1H	S_Shelf	++++	++++	0.00978469	1	0	0	0
cg01625087	6	101841008		N_Shore	++++	++++	0.00979452	1	0	0	0
cg04194272	20	33683537		S_Shelf	++++	++++	0.00982403	1	0	0	0
cg23166865	1	63539729			++++	++++	0.00985027	0.0762051	0	0	0
cg17496659	1	3568245	TP73	Island	++++	++++	0.00988306	1	0	0	0
cg02052915	17	46797568		S_Shore	++++	++++	0.00988634	0.301673	0	0	0
cg01530605	3	181414848	SOX2OT	S_Shore	++++	++++	0.00988634	0.22832	1	0	1
cg20061155	8	109095388	RSPO2	Island	++++	-+++	0.00992241	1	0	0	0
cg24576945	3	42743203	HHATL;HHATL		++++	++++	0.00992568	1	0	0	0
cg26950557	5	38258441	EGFLAM	Island	++++	++++	0.00994864	1	0	0	0
cg18220816	14	102411665		N_Shelf	++++	++++	0.00998471	1	0	0	0
cg15503722	11	122850522	BSX	N_Shore	++++	++-+	0.00999127	0.410537	0	0	0

## Sheet: males saVMPs
CpG	CHR	MAPINFO	UCSC_REFGENE_NAME	RELATION_TO_UCSC_CPG_ISLAND	Direction in females	Direction in males	Bonferroni corrected p-value in females	Bonferroni corrected p-value in males	Found in Inoshita et al., 2015?	Found in Singmann et al., 2015?	Found in Yousefi et al., 2015?
cg19903229	14	57960650	C14orf105		++++	++++	0.160903	8.72227e-19	0	0	0
cg10121113	8	20112959	LZTS1		++++	++++	0.189857	3.13444e-17	0	0	0
cg14241045	9	140778757	CACNA1B	S_Shore	++++	++++	1	5.17762e-17	0	0	0
cg03261155	1	153413940	S100A7L2		++++	++++	1	1.6005e-16	0	0	0
cg27202475	11	43955465			++++	++++	0.213466	1.63067e-16	0	0	0
cg02703908	3	9593701	LHFPL4	N_Shore	++++	++++	0.104143	1.90972e-16	0	0	0
cg07466217	12	126689156			++++	++++	1	2.87966e-16	0	0	0
cg17959580	22	37824617	ELFN2	S_Shore	++++	++++	1	3.11903e-16	0	0	0
cg21052415	13	25746587	FAM123A;FAM123A	S_Shore	++++	++++	0.984371	3.85616e-16	0	0	1
cg20116907	3	188664990		N_Shore	++++	++++	0.173626	3.90207e-16	0	0	0
cg26019250	11	44335005		N_Shelf	++++	++++	0.162641	4.78413e-16	0	0	0
cg10140104	16	1060680		Island	++++	++++	0.708603	5.26288e-16	0	0	0
cg13316619	15	73314754			++++	++++	0.264521	5.69899e-16	0	0	0
cg01284619	19	589411	HCN2	N_Shore	++++	++++	0.454476	5.9482e-16	0	0	0
cg25400864	17	60005610	INTS2;INTS2	S_Shore	++++	++++	0.674173	6.24659e-16	0	0	0
cg12611449	1	201252200	PKP1;PKP1	N_Shore	++++	++++	0.273801	6.43022e-16	0	0	0
cg26717133	10	85953953	PCDH21	N_Shore	++++	++++	0.404963	7.18112e-16	0	0	0
cg04654489	16	17165002			++++	++++	0.403323	8.46323e-16	0	0	0
cg14039909	11	76433293	GUCY2E		++++	++++	1	1.1716e-15	0	0	0
cg07465864	5	112849162	YTHDC2	N_Shore	++++	++++	0.442344	1.22177e-15	0	0	0
cg17021907	2	119918913		S_Shelf	++++	++++	1	1.64346e-15	0	0	0
cg01794501	1	161229027	PCP4L1	Island	++++	++++	1	2.15794e-15	0	0	0
cg02824888	12	115129011		N_Shore	++++	++++	0.493169	2.1727e-15	0	0	0
cg03707967	6	118097745			++++	++++	0.504646	2.72128e-15	0	0	0
cg05348973	1	110697298	SLC6A17	S_Shelf	++++	++++	1	2.83966e-15	0	0	0
cg21209022	7	71217765			++++	++++	0.138737	3.23183e-15	0	0	0
cg25744127	11	109292505	C11orf87	N_Shore	++++	++++	0.443655	4.04635e-15	0	0	0
cg22297966	6	33422952	ZBTB9	S_Shore	++++	++++	0.0580392	4.62346e-15	0	0	0
cg04134015	3	193310532	OPA1;OPA1;OPA1;OPA1;OPA1;OPA1;OPA1;OPA1	N_Shore	++++	++++	0.0618101	6.89912e-15	0	0	0
cg09838217	5	179770299	GFPT2		++++	++++	1	9.74534e-15	0	0	0
cg02434007	5	139937350	SRA1;SRA1	S_Shore	++++	++++	1	9.85355e-15	0	0	0
cg21747496	3	128445986	RAB7A	S_Shore	++++	++++	0.0677124	1.05421e-14	0	0	0
cg00614617	17	8921074		N_Shelf	++++	++++	0.142245	1.05979e-14	0	0	0
cg10883069	2	241771040		N_Shore	++++	++++	1	1.22604e-14	0	0	0
cg06197836	1	39283522		N_Shore	++++	++++	0.156542	1.23063e-14	0	0	0
cg23466749	6	100920825		S_Shelf	++++	++++	0.538092	1.25227e-14	0	0	0
cg18536644	11	2423045	TSSC4	S_Shore	++++	++++	0.622364	1.25391e-14	0	0	0
cg18240703	17	77093866	HRNBP3	S_Shore	++++	++++	0.0515467	1.34671e-14	0	0	0
cg04743872	2	230135577	PID1;PID1	N_Shore	++++	++++	0.23819	1.54771e-14	0	0	0
cg18863090	1	58714305	DAB1	N_Shore	++++	++++	0.415784	1.60772e-14	0	0	0
cg12597066	17	16473468	ZNF287	S_Shore	++++	++++	1	1.70478e-14	0	0	0
cg12532477	16	75529504	CHST6	S_Shore	++++	++++	1	1.73986e-14	0	0	0
cg13164087	6	87832666		S_Shore	++++	++++	0.114144	2.24943e-14	0	0	0
cg22595443	10	14510114			++++	++++	0.12244	2.4242e-14	0	0	0
cg08763461	5	145710603		N_Shelf	++++	++++	1	2.78588e-14	0	0	0
cg01252455	5	175294907	CPLX2	N_Shelf	++++	++++	1	3.34135e-14	0	0	0
cg26053526	1	18609735	IGSF21		++++	++++	0.30928	3.50858e-14	0	0	0
cg12845975	3	62305226	C3orf14	S_Shore	++++	++++	0.209499	3.56433e-14	0	0	0
cg03176520	2	220409474	CHPF;TMEM198	S_Shore	++++	++++	1	3.66598e-14	0	0	0
cg16938613	2	219859695		N_Shore	++++	++++	0.257241	3.85944e-14	0	0	0
cg08276524	16	1169376			++++	++++	0.187234	4.13488e-14	0	0	0
cg23502298	5	150728626	SLC36A2		++++	++++	0.0873539	4.16111e-14	0	0	0
cg08053137	12	54385436	MIR196A2	N_Shelf	++++	++++	1	4.64313e-14	0	0	0
cg16532606	17	46036419	PRR15L		++++	++++	0.468904	5.47929e-14	0	0	0
cg00884844	15	100879500	ADAMTS17	N_Shore	++++	++++	1	5.48913e-14	0	0	0
cg23859303	7	158243632	PTPRN2;PTPRN2;PTPRN2		++++	++++	1	5.87278e-14	0	0	0
cg25364822	1	33337257	FNDC5		++++	++++	0.0568587	6.55482e-14	0	0	0
cg18771937	12	54385517	MIR196A2	N_Shelf	++++	++++	1	7.33851e-14	0	0	0
cg17755564	17	4694156		S_Shore	++++	++++	1	8.79113e-14	0	0	0
cg19536929	12	115134594		N_Shore	++++	++++	0.238879	9.30594e-14	0	0	0
cg07571531	6	134216081	TCF21	N_Shore	++++	++++	0.138081	9.54859e-14	0	0	0
cg21336435	12	54398561		N_Shore	++++	++++	1	9.82403e-14	0	0	0
cg13401823	1	204910715	NFASC;NFASC;NFASC;NFASC;NFASC		++++	++++	0.164018	1.04503e-13	0	0	0
cg25102726	5	6143809			++++	++++	0.0637447	1.07028e-13	0	0	0
cg19975849	12	116310045			++++	++++	0.10552	1.09225e-13	0	0	0
cg06610376	4	154712902		N_Shore	++++	++++	0.291835	1.12996e-13	0	0	0
cg25348323	7	45131862		S_Shelf	++++	++++	0.212679	1.45131e-13	0	0	0
cg00388287	2	23358444			++++	++++	0.0561701	1.47361e-13	0	0	0
cg25616777	1	27645056		N_Shelf	++++	++++	0.0976173	1.48869e-13	0	0	0
cg12456800	5	140165938	PCDHA1;PCDHA1;PCDHA1	N_Shore	++++	++++	1	1.58149e-13	0	0	0
cg16447794	16	331207	ARHGDIG	N_Shore	++++	++++	1	1.66805e-13	0	0	0
cg17459778	4	189321136			++++	++++	0.758444	1.70183e-13	0	0	0
cg19942454	10	1559193	ADARB2		++++	++++	0.476774	1.72216e-13	0	0	0
cg07800227	13	112628189		S_Shore	++++	++++	0.865013	1.78807e-13	0	0	0
cg00216901	20	36156919	BLCAP;BLCAP;BLCAP;BLCAP	S_Shore	++++	++++	0.0662368	1.80118e-13	0	0	0
cg05650260	6	50692762	TFAP2D	S_Shore	++++	++++	0.132539	1.88677e-13	0	0	0
cg09946915	8	46941151			++++	++++	1	1.92021e-13	0	0	0
cg18376773	20	44878374	CDH22	N_Shore	++++	++++	0.119292	2.11499e-13	0	0	0
cg17312632	4	6227099		S_Shelf	++++	++++	0.0945022	2.12646e-13	0	0	0
cg14000125	20	61704742		S_Shore	++++	++++	1	2.34944e-13	0	0	0
cg24996440	2	3583570			++++	++++	0.151394	2.46125e-13	0	0	0
cg17610931	22	31476670	SMTN;SMTN;SMTN	N_Shore	++++	++++	1	2.5288e-13	0	0	0
cg17092985	8	20119213			++++	++++	0.176708	2.62652e-13	0	0	0
cg08713711	5	1444333	SLC6A3	Island	++++	++++	0.139097	2.69505e-13	0	0	0
cg13826247	12	54424203	HOXC4;HOXC5;HOXC6;HOXC6	N_Shore	++++	++++	0.130211	2.90294e-13	0	0	1
cg10384482	19	12941353	RTBDN;RTBDN	N_Shore	++++	++++	0.105028	3.22921e-13	0	0	0
cg02638589	15	72477069	GRAMD2	S_Shore	++++	++++	0.207105	3.23282e-13	0	0	0
cg19576798	12	116893334			++++	++++	0.878785	3.40365e-13	0	0	0
cg10674793	3	183872704	DVL3	N_Shore	++++	++++	1	3.53482e-13	0	0	0
cg04120329	10	135160120	PRAP1;PRAP1		++++	++++	0.222943	3.6004e-13	0	0	0
cg11149163	5	2387826			++++	++++	1	3.63319e-13	0	0	0
cg02807192	17	75524111		N_Shore	++++	++++	1	4.02339e-13	0	0	0
cg04844038	10	108921320	SORCS1;SORCS1	N_Shelf	++++	++++	0.474151	4.06602e-13	0	0	0
cg06521960	16	1220382	CACNA1H;CACNA1H	N_Shore	++++	++++	0.662368	4.41688e-13	0	0	0
cg08529931	10	88124564	GRID1	Island	++++	++++	1	4.43655e-13	0	0	0
cg12189137	12	117628578	FBXO21;FBXO21	S_Shore	++++	++++	1	4.69232e-13	0	0	0
cg23299445	15	73113226			++++	++++	0.0971583	4.71855e-13	0	0	0
cg14424631	15	51526420	CYP19A1;CYP19A1		++++	++++	1	4.77102e-13	0	0	0
cg12103742	11	64739852		S_Shore	++++	++++	1	4.96448e-13	0	0	1
cg08908987	8	10589905		Island	++++	++++	1	5.09564e-13	0	0	0
cg21627412	13	96297281	DZIP1;DZIP1	S_Shore	++++	++++	0.0511204	5.38748e-13	0	0	0
cg00856580	1	52456669	RAB3B	S_Shore	++++	++++	0.114504	5.63013e-13	0	0	0
cg01249187	16	1204617	CACNA1H;CACNA1H	Island	++++	++++	1	5.69571e-13	0	0	0
cg10639425	5	1364079			++++	++++	0.420702	5.96787e-13	0	0	0
cg27079322	17	59530436		N_Shore	++++	++++	1	5.98099e-13	0	0	0
cg16477259	16	86191361			++++	++++	0.275211	6.40726e-13	0	0	0
cg10113589	10	98118853	OPALIN;OPALIN;OPALIN;OPALIN;OPALIN;OPALIN		++++	++++	0.102897	6.4335e-13	0	0	0
cg10479672	2	113810641	IL1F8;IL1F8	S_Shore	++++	++++	1	6.48596e-13	0	0	0
cg23181831	13	112785388			++++	++++	0.357744	6.58433e-13	0	0	0
cg09760387	17	28705147	CPD	N_Shore	++++	++++	0.156214	6.75156e-13	0	0	1
cg04091822	16	54974287		S_Shore	++++	++++	0.608592	7.00733e-13	0	0	1
cg11351987	19	4769047	C19orf30		++++	++++	1	7.0434e-13	0	1	1
cg03602360	2	79664699			++++	++++	1	7.26965e-13	0	0	0
cg00426659	12	99548329	ANKS1B;ANKS1B;ANKS1B;ANKS1B;ANKS1B		++++	++++	0.101519	7.65002e-13	0	0	0
cg03271761	4	21699209	KCNIP4;KCNIP4;KCNIP4		++++	++++	1	8.14844e-13	0	0	0
cg02809611	16	3253368	OR1F1		++++	++++	1	8.28288e-13	0	0	0
cg16336239	2	115052995			++++	++++	0.523992	9.26332e-13	0	0	0
cg21082557	2	120281354	SCTR	N_Shore	++++	++++	0.0604329	9.27643e-13	0	0	0
cg14758072	2	47799268		S_Shore	++++	++++	1	9.54859e-13	0	0	0
cg20294304	6	34203153	HMGA1;HMGA1;HMGA1;HMGA1;HMGA1	Island	++++	++++	0.0691224	9.56499e-13	0	0	0
cg08885224	6	133561368	EYA4;EYA4;EYA4	N_Shore	++++	++++	1	9.70271e-13	0	1	1
cg07701757	4	147164858			++++	++++	0.29964	1.0352e-12	0	0	0
cg22906486	5	178773355	ADAMTS2;ADAMTS2	S_Shore	++++	++++	1	1.04438e-12	0	0	0
cg00777805	6	134214649	TCF21	S_Shore	++++	++++	1	1.0975e-12	0	0	0
cg26075150	7	96643821	DLX6AS	N_Shore	++++	++++	0.52432	1.15193e-12	0	0	0
cg24592576	12	114887657		S_Shore	++++	++++	0.0970599	1.18636e-12	0	0	0
cg01706824	15	89336004			++++	++++	0.171002	1.18833e-12	0	0	0
cg14558573	3	9811813	CAMK1	S_Shore	++++	++++	1	1.20964e-12	0	0	0
cg10086720	6	33169259	SLC39A7;RXRB;SLC39A7	S_Shore	++++	++++	1	1.24014e-12	0	0	0
cg20318662	2	47452	FAM110C	S_Shore	++++	++++	1	1.26243e-12	0	0	0
cg01977209	2	236293433		Island	++++	++++	1	1.28965e-12	0	0	0
cg23725072	11	131557695	NTM	N_Shelf	++++	++++	0.268259	1.38146e-12	0	0	0
cg03399199	1	32671884	IQCC;IQCC	Island	++++	++++	0.202121	1.55952e-12	0	0	0
cg08443605	3	24872319		S_Shore	++++	++++	1	1.56771e-12	0	0	0
cg21817187	17	26711117	SARM1	N_Shore	++++	++++	1	1.58444e-12	0	0	0
cg13352518	11	124708433		N_Shore	++++	++++	1	1.61559e-12	0	0	0
cg26886277	2	86566099	REEP1;REEP1;REEP1;REEP1	S_Shore	++++	++++	1	1.64215e-12	0	0	0
cg13726459	12	54409657	HOXC4;HOXC6;HOXC5	S_Shore	++++	++++	1	1.65559e-12	0	0	0
cg25460984	6	1608396		Island	++++	++++	0.0526943	1.69953e-12	0	0	0
cg00948124	8	35452334	UNC5D		++++	++++	1	1.74478e-12	0	0	0
cg13066963	1	6485317	ESPN	Island	++++	++++	0.150148	1.82709e-12	0	0	0
cg06628878	12	52995425	KRT72;KRT72;KRT72	S_Shore	++++	++++	0.0674173	1.90349e-12	0	0	0
cg02079122	1	240262933	FMN2		++++	++++	1	2.0235e-12	0	0	0
cg18303360	1	26373288	SLC30A2;SLC30A2	Island	++++	++++	0.978141	2.07465e-12	0	0	0
cg11709544	1	26233404	STMN1;STMN1;STMN1;STMN1	Island	++++	++++	0.412832	2.22582e-12	0	0	0
cg07487731	5	140616495	PCDHB18	S_Shore	++++	++++	0.072467	2.25697e-12	0	0	0
cg20365687	13	60834809			++++	++++	0.278293	2.27861e-12	0	0	0
cg07686916	16	1128014	SSTR5;LOC146336	N_Shore	++++	++++	1	2.36026e-12	0	0	0
cg07161397	1	18431241		N_Shelf	++++	++++	1	2.40879e-12	0	0	0
cg14396619	7	98424185			++++	++++	1	2.43994e-12	0	0	0
cg27305303	2	26781231	OTOF	N_Shelf	++++	++++	1	2.44716e-12	0	0	0
cg06054552	19	41060564	SPTBN4;SPTBN4	Island	++++	++++	1	2.46978e-12	0	0	0
cg07436224	22	30115348	CABP7	N_Shore	++++	++++	0.464313	2.56061e-12	0	0	0
cg02457750	1	200011273	NR5A2;NR5A2	N_Shore	++++	++++	0.175888	2.59635e-12	0	0	0
cg06039392	4	187476953	MTNR1A	S_Shore	++++	++++	1	2.62455e-12	0	0	0
cg04640913	20	44880515	CDH22	S_Shore	++++	++++	0.114996	2.71669e-12	0	0	0
cg17652792	5	140562007	PCDHB16;PCDHB16	N_Shore	++++	++++	1	2.82359e-12	0	0	0
cg18963763	10	99612150	GOLGA7B	S_Shelf	++++	++++	0.0520057	2.90655e-12	0	0	0
cg07118953	16	1123333	LOC146336	S_Shore	++++	++++	0.105028	2.92196e-12	0	0	0
cg27083740	16	6071073	A2BP1;A2BP1	S_Shore	++++	++++	0.0718112	2.94852e-12	0	0	0
cg13392793	11	69533448			++++	++++	0.228517	2.98525e-12	0	0	0
cg23506077	20	34824050	C20orf4	N_Shore	++++	++++	0.133785	3.0105e-12	0	0	0
cg10181281	2	215275973	VWC2L		++++	++++	0.806974	3.0141e-12	0	0	0
cg20176388	2	17724532	VSNL1	S_Shelf	++++	++++	0.656794	3.08919e-12	0	0	0
cg14059822	5	3285935			++++	++++	0.211564	3.20658e-12	0	0	0
cg27514777	16	14377664		N_Shore	++++	++++	1	3.25183e-12	0	0	0
cg27086690	15	57026064	ZNF280D;ZNF280D;ZNF280D	Island	++++	++++	1	3.28889e-12	0	0	1
cg05635036	12	110149962		N_Shore	++++	++++	1	3.39382e-12	0	0	0
cg02728263	9	34622261	ARID3C	N_Shore	++++	++++	1	3.39382e-12	0	0	0
cg26645834	20	55904875	SPO11;SPO11;SPO11;SPO11	Island	++++	++++	1	3.41021e-12	0	0	0
cg07091798	16	1060367		N_Shore	++++	++++	0.494809	3.49219e-12	0	0	0
cg11469778	2	131674201	ARHGEF4;ARHGEF4	S_Shore	++++	++++	1	3.6463e-12	0	0	0
cg16030113	17	58222754		S_Shelf	++++	++++	1	3.64958e-12	0	0	0
cg02234281	10	25790938	GPR158		++++	++++	1	3.66598e-12	0	0	0
cg17943876	5	92359386			++++	++++	1	3.69221e-12	0	0	0
cg23085154	5	71014409	CARTPT	N_Shore	++++	++++	1	3.71844e-12	0	0	0
cg05168764	14	91283338	TTC7B	S_Shore	++++	++++	1	3.74468e-12	0	0	0
cg20692922	5	6069935			++++	++++	0.296984	3.7873e-12	0	0	0
cg02898159	19	5346237			++++	++++	1	3.83321e-12	0	0	0
cg01882933	5	180467044	BTNL9		++++	++++	0.0682698	3.87584e-12	0	0	0
cg07120369	3	187388281	SST	S_Shore	++++	++++	0.736147	3.96109e-12	0	0	0
cg01730148	2	3698421		N_Shore	++++	++++	1	4.01684e-12	0	0	0
cg23120942	17	58755752	BCAS3;BCAS3	S_Shore	++++	++++	0.76697	4.08898e-12	0	0	0
cg19237923	1	156831236	NTRK1;NTRK1;NTRK1	S_Shore	++++	++++	0.092666	4.148e-12	0	0	0
cg09328362	14	36992787		N_Shore	++++	++++	0.129031	4.15784e-12	0	0	0
cg08759569	17	77302351	HRNBP3		++++	++++	1	4.22997e-12	0	0	0
cg23996302	1	201140803		S_Shore	++++	++++	0.102864	4.289e-12	0	0	0
cg13998223	9	98389082			++++	++++	0.634168	4.35458e-12	0	0	0
cg08507952	3	193750969			++++	++++	1	4.36769e-12	0	0	0
cg07036914	17	36577690		S_Shore	++++	++++	1	4.42344e-12	0	0	0
cg13978352	6	30908706	DPCR1		++++	++++	1	4.56772e-12	0	0	0
cg01302668	6	117087238	FAM162B	S_Shore	++++	++++	0.0934201	4.75462e-12	0	0	1
cg00313750	13	25746473	FAM123A;FAM123A	S_Shore	++++	++++	0.186709	4.92513e-12	0	0	0
cg06208229	16	1145964	C1QTNF8	S_Shore	++++	++++	0.0689584	5.07925e-12	0	0	0
cg21198755	14	105045938	C14orf180		++++	++++	1	5.14811e-12	0	0	0
cg27427581	10	8075716		N_Shore	++++	++++	0.0940759	5.24648e-12	0	0	0
cg04492193	4	8135668	ABLIM2;ABLIM2;ABLIM2;ABLIM2;ABLIM2;ABLIM2;ABLIM2		++++	++++	0.767298	5.26288e-12	0	0	0
cg08922201	11	61322742	SYT7	Island	++++	++++	1	5.29894e-12	0	0	0
cg10373508	7	98287427			++++	++++	0.584327	5.37108e-12	0	0	0
cg17563271	17	77632749			++++	++++	0.792546	5.59406e-12	0	0	0
cg17393458	5	176982009	FAM193B;FAM193B	S_Shore	++++	++++	1	5.64652e-12	0	0	0
cg05967404	22	37824343	ELFN2	S_Shore	++++	++++	1	5.67931e-12	0	0	0
cg16590190	1	13909522	PDPN;PDPN	N_Shore	++++	++++	0.223795	5.76129e-12	0	0	0
cg20600729	12	50344475	AQP2		++++	++++	0.537764	5.82359e-12	0	0	0
cg11294626	4	129557264			++++	++++	0.285572	5.85638e-12	0	0	0
cg17880816	19	3789435	MATK	S_Shelf	++++	++++	1	5.95148e-12	0	0	0
cg02962597	12	117799749	NOS1	S_Shore	++++	++++	1	5.96787e-12	0	0	0
cg07545037	12	54423920	HOXC4;HOXC5;HOXC6;HOXC6	N_Shore	++++	++++	0.066991	5.96787e-12	0	0	1
cg08717880	2	177014849	HOXD4;MIR10B	N_Shore	++++	++++	0.294491	6.02034e-12	0	0	0
cg12689608	16	1130130	SSTR5;LOC146336;SSTR5	Island	++++	++++	0.507269	6.16789e-12	0	0	0
cg05977462	12	111475136	CUX2	Island	++++	++++	1	6.44333e-12	0	1	1
cg01148731	5	174156296	MSX2	N_Shelf	++++	++++	1	6.4794e-12	0	0	0
cg21231262	9	122521448			++++	++++	0.167789	6.6991e-12	0	0	0
cg08748969	12	69327779	CPM;CPM;CPM	S_Shore	++++	++++	0.767298	6.73845e-12	0	0	0
cg19529471	13	35517634	NBEA		++++	++++	1	6.94503e-12	0	0	0
cg00526772	10	119830037	CASC2;CASC2;CASC2		++++	++++	0.42103	6.98438e-12	0	0	0
cg27127090	16	1131327		S_Shore	++++	++++	1	7.08603e-12	0	0	0
cg17066403	6	32065028	TNXB	Island	++++	++++	0.976173	7.25654e-12	0	0	0
cg22793130	8	144163464		N_Shelf	++++	++++	1	7.31228e-12	0	0	0
cg07823273	19	39695065	SYCN	S_Shore	++++	++++	0.111881	7.34835e-12	0	0	0
cg01583716	16	7855518			++++	++++	1	7.35491e-12	0	0	0
cg06116236	19	54466724	CACNG8	Island	++++	++++	0.0500711	7.47623e-12	0	0	0
cg23374863	14	94984140	SERPINA12;SERPINA12		++++	++++	0.152312	7.80086e-12	0	0	0
cg23033691	11	66185611		N_Shelf	++++	++++	0.576785	7.80742e-12	0	0	0
cg24938727	3	42742993	HHATL;HHATL		++++	++++	0.743033	8.14516e-12	0	0	0
cg24432193	6	102062733	GRIK2;GRIK2;GRIK2		++++	++++	0.069647	8.24353e-12	0	0	0
cg19717060	17	70553078			++++	++++	0.123751	8.73211e-12	0	0	0
cg20685674	1	26233538	STMN1;STMN1;STMN1;STMN1	Island	++++	++++	0.700733	8.73867e-12	0	0	0
cg04722511	1	20692222		N_Shore	++++	++++	1	8.77146e-12	0	0	0
cg09251362	12	110211325	MGC14436;MGC14436		++++	++++	0.314297	8.97148e-12	0	0	0
cg24439315	19	51067388	LRRC4B	N_Shore	++++	++++	0.288425	9.52564e-12	0	0	0
cg13413996	9	136324127	ADAMTS13;ADAMTS13;ADAMTS13;C9orf7;C9orf7;ADAMTS13	N_Shore	++++	++++	1	9.70271e-12	0	0	0
cg03920729	1	16768195	NECAP2;NECAP2;NECAP2	S_Shore	++++	++++	0.342989	9.86994e-12	0	0	0
cg06835125	2	105797369			++++	++++	1	9.93224e-12	0	0	0
cg27008316	12	34753697			++++	++++	0.265406	9.94536e-12	0	0	0
cg20709203	13	53174588		Island	++++	++++	0.563669	1.01355e-11	0	0	0
cg24569257	5	155105708		N_Shore	++++	++++	0.109422	1.01487e-11	0	0	0
cg08829195	16	1227293	CACNA1H;CACNA1H	Island	++++	++++	1	1.02798e-11	0	0	0
cg18946226	13	109248503	MYO16;MYO16		++++	++++	0.071057	1.04241e-11	0	0	0
cg10754668	17	35168702		S_Shelf	++++	++++	1	1.04339e-11	0	0	0
cg09959150	8	709624			++++	++++	0.0609903	1.05618e-11	0	1	0
cg22904048	4	6665672		Island	++++	++++	0.187693	1.05946e-11	0	0	0
cg08967764	3	88050264			++++	++++	1	1.06372e-11	0	0	0
cg04002486	16	1162736			++++	++++	1	1.09455e-11	0	0	0
cg19356515	11	108408950	EXPH5;EXPH5;EXPH5		++++	++++	1	1.12963e-11	0	0	0
cg26070426	10	59388601			++++	++++	0.828288	1.1398e-11	0	0	0
cg07911361	22	45126040	PRR5;PRR5;PRR5;PRR5-ARHGAP8;PRR5;PRR5	S_Shore	++++	++++	0.106667	1.16833e-11	0	0	0
cg12303627	1	75549256			++++	++++	0.198842	1.18603e-11	0	0	0
cg11553687	11	70959713		N_Shelf	++++	++++	0.0686633	1.19685e-11	0	0	0
cg03533294	2	219861109		Island	++++	++++	1	1.21226e-11	0	0	0
cg08967338	5	140535215	PCDHB17	N_Shore	++++	++++	0.561701	1.24702e-11	0	0	0
cg07848409	3	172166987	GHSR;GHSR	N_Shore	++++	++++	0.0550552	1.26047e-11	0	0	0
cg27116365	5	137827315		N_Shore	++++	++++	0.0816156	1.26801e-11	0	0	0
cg14486905	2	171677602	GAD1;GAD1	N_Shore	++++	++++	0.163887	1.26866e-11	0	0	0
cg09739212	11	56891858			++++	++++	0.153197	1.29031e-11	0	0	0
cg26455175	16	853533		N_Shelf	++++	++++	0.0790579	1.34212e-11	0	0	0
cg06732241	12	124626058			++++	++++	1	1.34507e-11	0	0	0
cg03673138	11	72385963	PDE2A		++++	++++	0.294688	1.36048e-11	0	0	0
cg04701505	5	145719413	POU4F3	Island	++++	++++	1	1.40015e-11	0	0	0
cg10664754	9	139939662	NPDC1	N_Shore	++++	++++	1	1.50574e-11	0	0	0
cg06133908	20	36156936	BLCAP;BLCAP;BLCAP;BLCAP	S_Shore	++++	++++	1	1.51656e-11	0	0	1
cg22855255	17	50237267	CA10;CA10;CA10	S_Shore	++++	++++	1	1.54148e-11	0	0	0
cg14064526	5	176171341		S_Shore	++++	++++	1	1.59985e-11	0	0	0
cg00951857	6	108435666		N_Shore	++++	++++	1	1.62411e-11	0	0	0
cg21621114	19	48325360	CRX		++++	++++	0.0736803	1.65658e-11	0	0	0
cg06719901	3	117329281			++++	++++	1	1.66313e-11	0	0	0
cg14194496	9	34809475		N_Shore	++++	++++	1	1.69429e-11	0	0	0
cg09624870	10	123871988	TACC2;TACC2	N_Shore	++++	++++	0.0851569	1.73298e-11	0	0	0
cg17934894	4	27050410			++++	++++	1	1.7497e-11	0	0	0
cg08636808	15	89889498			++++	++++	1	1.82741e-11	0	0	0
cg24322968	17	46507895	SKAP1;SKAP1	S_Shore	++++	++++	1	1.83594e-11	0	0	0
cg25590734	19	18044416	CCDC124;CCDC124	S_Shore	++++	++++	0.367254	1.86906e-11	0	0	0
cg21617694	6	28715138			++++	++++	1	1.93333e-11	0	0	0
cg24963147	5	135529341	LOC389332	S_Shore	++++	++++	0.214909	1.96743e-11	0	0	0
cg21962562	5	7331433			++++	++++	0.13972	2.00153e-11	0	0	0
cg26262152	4	493729	ZNF721;PIGG;PIGG	S_Shore	++++	++++	0.113357	2.02022e-11	0	0	0
cg04471507	1	26233376	STMN1;STMN1;STMN1;STMN1	Island	++++	++++	0.0589901	2.02186e-11	0	0	1
cg07361874	5	132073577	KIF3A	S_Shore	++++	++++	1	2.0258e-11	0	0	0
cg20171297	12	81101474	MYF6;MYF6	N_Shore	++++	++++	1	2.02875e-11	0	1	0
cg12794758	1	203097234	ADORA1;ADORA1	Island	++++	++++	1	2.05662e-11	0	0	0
cg06541093	15	74537514	CCDC33	N_Shore	++++	++++	0.392502	2.06318e-11	0	0	0
cg12123983	14	62228668	SNAPC1	N_Shore	++++	++++	0.0838125	2.09728e-11	0	0	0
cg00664406	3	51740875	GRM2;GRM2	Island	++++	++++	0.618429	2.09826e-11	0	0	0
cg17665927	11	2170443	INS-IGF2;INS-IGF2;IGF2;IGF2		++++	++++	1	2.10318e-11	0	0	0
cg21937460	17	30185369	C17orf79	N_Shore	++++	++++	0.647612	2.10646e-11	0	0	0
cg24377133	8	144170375		S_Shelf	++++	++++	0.927971	2.15466e-11	0	0	0
cg00145732	16	1095673		N_Shelf	++++	++++	0.258979	2.1868e-11	0	0	0
cg18234352	19	18977405	UPF1	N_Shore	++++	++++	0.17156	2.2891e-11	0	1	0
cg13328400	15	74043577	C15orf59;C15orf59	N_Shore	++++	++++	0.102274	2.30222e-11	0	0	0
cg00707688	21	45999571	KRTAP10-5;C21orf29;KRTAP10-5		++++	++++	1	2.3078e-11	0	0	0
cg17081027	1	223566447	C1orf65	N_Shore	++++	++++	0.245076	2.3701e-11	0	0	0
cg17648101	19	17438324	ANO8	Island	++++	++++	1	2.38059e-11	0	0	0
cg05946623	16	62071193	CDH8	S_Shore	++++	++++	1	2.3901e-11	0	0	0
cg17500055	1	235805560	GNG4;GNG4;GNG4	Island	++++	++++	0.105782	2.40387e-11	0	0	0
cg22716151	5	532959		N_Shelf	++++	++++	1	2.416e-11	0	0	0
cg27277583	15	76484625	C15orf27	S_Shore	++++	++++	0.178184	2.44092e-11	0	0	0
cg12812068	1	47016114	KNCN		++++	++++	1	2.44552e-11	0	0	0
cg03402161	12	132835993	GALNT9	N_Shore	++++	++++	1	2.44879e-11	0	0	0
cg26038749	4	7289858	SORCS2		++++	++++	0.16369	2.50126e-11	0	0	0
cg19199159	18	44772289		N_Shore	++++	++++	1	2.50421e-11	0	0	0
cg17314700	2	19548291		Island	++++	++++	1	2.52225e-11	0	0	0
cg19088218	1	20248753	PLA2G2E		++++	++++	0.998143	2.53339e-11	0	0	0
cg02682525	11	113258277	ANKK1	N_Shore	++++	++++	1	2.54028e-11	0	0	0
cg14474561	20	48096466	KCNB1	N_Shelf	++++	++++	0.599738	2.557e-11	0	0	0
cg25003907	15	65342244	OSTBETA		++++	++++	1	2.57078e-11	0	0	0
cg09862148	6	10388322		N_Shore	++++	++++	1	2.57569e-11	0	0	0
cg11821637	12	79876086			++++	++++	0.368893	2.58848e-11	0	0	0
cg26721759	11	133616965			++++	++++	0.315215	2.61898e-11	0	0	0
cg00134667	16	1244321	CACNA1H;CACNA1H	N_Shore	++++	++++	0.0592852	2.62193e-11	0	0	0
cg25067245	6	83448653			++++	++++	0.236879	2.63996e-11	0	0	0
cg07183637	6	31940692	STK19;STK19;DOM3Z;STK19	S_Shore	++++	++++	1	2.65406e-11	0	0	0
cg19797049	7	102985504	DNAJC2;DNAJC2	S_Shore	++++	++++	0.0845667	2.69931e-11	0	0	1
cg00394844	19	18343302	PDE4C	N_Shore	++++	++++	0.401684	2.70259e-11	0	0	0
cg24154326	20	30556611	XKR7	S_Shore	++++	++++	0.239666	2.7285e-11	0	0	0
cg04926732	4	619314	PDE6B;PDE6B	N_Shore	++++	++++	0.676796	2.7321e-11	0	0	0
cg03733979	20	61718618		N_Shore	++++	++++	0.708931	2.78359e-11	0	0	0
cg13638983	3	14619577		S_Shelf	++++	++++	0.055252	2.85048e-11	0	0	0
cg15383087	19	36910144	ZFP82	S_Shore	++++	++++	1	2.85113e-11	0	0	1
cg01136458	8	4853275	CSMD1	S_Shore	++++	++++	1	2.92262e-11	0	0	0
cg01775265	20	31780882	BASE		++++	++++	1	2.92786e-11	0	0	0
cg03983740	10	85049656			++++	++++	1	2.95803e-11	0	0	0
cg12547085	7	150689873	NOS3;NOS3;NOS3;NOS3		++++	++++	1	2.97279e-11	0	0	0
cg01156070	6	100064885		N_Shore	++++	++++	0.157001	2.99705e-11	0	0	0
cg15554219	3	137478371		N_Shore	++++	++++	1	2.99967e-11	0	0	0
cg25457437	2	72380973		S_Shelf	++++	++++	0.453821	3.00427e-11	0	0	0
cg13453607	17	74235635	RNF157	N_Shore	++++	++++	0.802384	3.00918e-11	0	0	0
cg08199133	19	39695034	SYCN	S_Shore	++++	++++	1	3.08559e-11	0	0	0
cg12095594	1	223306857	TLR5		++++	++++	0.942071	3.12166e-11	0	0	0
cg20389635	12	28120054	PTHLH;PTHLH;PTHLH;PTHLH	N_Shelf	++++	++++	1	3.1328e-11	0	0	0
cg07516742	8	55383951		S_Shore	++++	++++	1	3.15084e-11	0	0	0
cg15975890	5	11903145	CTNND2	N_Shore	++++	++++	0.131359	3.15313e-11	0	0	0
cg03792653	20	36661448	RPRD1B;KIAA0406	N_Shore	++++	++++	1	3.1633e-11	0	0	1
cg04558115	17	45871717		S_Shelf	++++	++++	0.180151	3.18625e-11	0	0	0
cg09814975	14	37135384	PAX9	N_Shore	++++	++++	1	3.20855e-11	0	0	0
cg01448470	1	18518226	IGSF21		++++	++++	0.206842	3.21347e-11	0	0	0
cg01566552	19	18977814	UPF1	Island	++++	++++	0.69024	3.2761e-11	0	0	0
cg25726077	4	112396360			++++	++++	1	3.29217e-11	0	0	0
cg20764780	7	158187725	PTPRN2;PTPRN2;PTPRN2		++++	++++	0.928955	3.40037e-11	0	0	0
cg07065220	3	193987540		Island	++++	++++	1	3.40365e-11	0	0	0
cg16038003	7	27226148	HOXA11AS;HOXA11	N_Shore	++++	++++	0.380698	3.43972e-11	0	0	0
cg26899399	1	201914027	LMOD1		++++	++++	0.416111	3.43972e-11	0	0	0
cg09310564	2	136850686			++++	++++	0.75123	3.45612e-11	0	0	0
cg25130336	5	1772638		S_Shelf	++++	++++	0.131949	3.49875e-11	0	0	0
cg18830527	2	87018966	CD8A;CD8A;CD8A;CD8A	S_Shore	++++	++++	0.683354	3.52826e-11	0	0	1
cg26875877	2	133346858	GPR39	S_Shelf	++++	++++	0.204777	3.56433e-11	0	0	0
cg12974660	12	117299348	HRK		++++	++++	0.0827304	3.64302e-11	0	0	0
cg14679255	12	54385526	MIR196A2	N_Shelf	++++	++++	1	3.725e-11	0	0	0
cg23340214	12	106974225		N_Shore	++++	++++	0.0755821	3.79714e-11	0	0	0
cg10283695	11	107465210	ELMOD1;ELMOD1	S_Shelf	++++	++++	0.492185	3.80042e-11	0	0	0
cg12650635	12	50344463	AQP2		++++	++++	1	3.82337e-11	0	0	0
cg26014401	22	25082111		Island	++++	++++	0.250683	3.94142e-11	0	0	0
cg16468182	15	43501957	EPB42;EPB42		++++	++++	1	4.05291e-11	0	0	0
cg16935039	6	1607507		Island	++++	++++	1	4.16767e-11	0	0	0
cg05537253	16	23314394	SCNN1B	S_Shore	++++	++++	0.0626626	4.19063e-11	0	0	0
cg10071493	16	1179514		N_Shore	++++	++++	1	4.22014e-11	0	0	0
cg07829465	6	30079536	TRIM31		++++	++++	1	4.23325e-11	0	0	0
cg00675037	8	55382194		N_Shore	++++	++++	0.278523	4.24309e-11	0	0	0
cg19830128	20	29995343	DEFB121		++++	++++	0.0919118	4.289e-11	0	0	0
cg05550339	22	49717722		Island	++++	++++	1	4.29556e-11	0	0	1
cg26956799	19	584425		N_Shore	++++	++++	1	4.32179e-11	0	0	0
cg03481039	11	116662012	APOA5;APOA5	S_Shore	++++	++++	1	4.41688e-11	0	1	1
cg12905836	12	54409770	HOXC4;HOXC6;HOXC5	N_Shore	++++	++++	0.322199	4.43328e-11	0	0	0
cg06947839	12	131502986	GPR133		++++	++++	0.0982731	4.45623e-11	0	0	0
cg11965365	14	104388185	C14orf2;C14orf2	S_Shore	++++	++++	0.664991	4.45951e-11	0	0	0
cg00712409	1	33358057	HPCA	N_Shore	++++	++++	0.104798	4.60379e-11	0	0	0
cg10040131	2	73178866	SFXN5		++++	++++	0.514483	4.61034e-11	0	0	0
cg06762332	17	59573001			++++	++++	0.480381	4.65625e-11	0	0	0
cg07927379	7	156433108	C7orf13;RNF32	Island	++++	++++	0.105913	4.66937e-11	0	0	0
cg15754660	7	34699393	NPSR1;NPSR1		++++	++++	1	4.72183e-11	0	0	0
cg19409254	13	36431974	MIR548F5;DCLK1		++++	++++	0.584327	4.73823e-11	0	0	0
cg22547540	6	32055007	TNXB	N_Shore	++++	++++	0.113258	4.76446e-11	0	0	0
cg03887438	11	132910642	OPCML		++++	++++	0.141753	4.84971e-11	0	0	0
cg19035496	8	67090792	CRH	S_Shore	++++	++++	1	4.86283e-11	0	0	0
cg08398233	1	20811641	CAMK2N1	Island	++++	++++	0.134277	4.89562e-11	0	0	0
cg13144588	19	3969950	DAPK3	N_Shore	++++	++++	0.166084	4.90874e-11	0	0	0
cg18700428	16	3243304		Island	++++	++++	1	5.05302e-11	0	0	0
cg26986928	5	3059243			++++	++++	1	5.08581e-11	0	0	0
cg14410476	2	95693023	MAL;MAL;MAL;MAL	S_Shore	++++	++++	0.0777135	5.21697e-11	0	0	0
cg02443658	16	28986829	SPNS1;SPNS1;SPNS1;SPNS1;SPNS1	S_Shore	++++	++++	1	5.23008e-11	0	0	0
cg11681428	5	1243949	SLC6A18	Island	++++	++++	1	5.2596e-11	0	0	0
cg08423879	12	103437918			++++	++++	0.212548	5.33829e-11	0	0	0
cg01242698	13	112908629			++++	++++	1	5.40715e-11	0	0	0
cg05594873	3	79814509	ROBO1	N_Shore	++++	++++	0.0555143	5.41371e-11	0	0	0
cg26909602	2	240972927			++++	++++	0.0518746	5.43666e-11	0	0	0
cg10214581	14	94811949			++++	++++	1	5.45306e-11	0	0	0
cg24553184	10	95752893	PLCE1	N_Shore	++++	++++	1	5.50552e-11	0	0	0
cg23652859	19	59092692	MGC2752	Island	++++	++++	1	5.55143e-11	0	0	0
cg21084508	2	219905564	CCDC108;CCDC108	N_Shore	++++	++++	0.3866	5.55143e-11	0	0	0
cg15161959	2	177020616		N_Shelf	++++	++++	1	5.57111e-11	0	0	0
cg09573795	4	4863874	MSX1	N_Shore	++++	++++	0.454476	5.63013e-11	0	0	0
cg01127320	3	126134977	CCDC37	N_Shore	++++	++++	0.171789	5.68259e-11	0	0	0
cg23146560	5	140430569	PCDHB1		++++	++++	0.597443	5.73834e-11	0	0	0
cg10760339	20	61447181	COL9A3	N_Shore	++++	++++	1	5.76129e-11	0	0	0
cg12681727	2	238262372	COL6A3;COL6A3;COL6A3		++++	++++	1	5.89245e-11	0	0	0
cg23322546	2	177040094		S_Shore	++++	++++	0.714833	5.91541e-11	0	0	0
cg22963652	10	102981014		N_Shore	++++	++++	0.0562357	5.98427e-11	0	0	0
cg07935886	8	41168001	SFRP1	S_Shore	++++	++++	0.171658	6.04001e-11	0	0	0
cg22788329	4	3642351		N_Shore	++++	++++	1	6.04657e-11	0	0	0
cg01958189	20	68396	DEFB125		++++	++++	1	6.1351e-11	0	0	0
cg05495546	5	113390551		N_Shore	++++	++++	1	6.16461e-11	0	0	0
cg23997185	5	140474401	PCDHB2	N_Shore	++++	++++	1	6.18429e-11	0	0	0
cg16125371	11	44332719	ALX4	Island	++++	++++	0.338398	6.22364e-11	0	0	0
cg03531951	21	39047966	KCNJ6	S_Shore	++++	++++	0.386272	6.24003e-11	0	0	0
cg02802029	3	145879686	PLOD2;PLOD2	S_Shore	++++	++++	0.293737	6.40398e-11	1	0	1
cg04085901	4	41867178		N_Shore	++++	++++	0.245502	6.66303e-11	0	0	1
cg13878456	17	38020344	IKZF3;IKZF3;IKZF3;IKZF3;IKZF3;IKZF3	N_Shore	++++	++++	1	6.68926e-11	0	0	1
cg12115302	12	30323676		S_Shore	++++	++++	0.0659745	6.74828e-11	0	0	0
cg16893574	16	71392095	CALB2;CALB2;CALB2	N_Shore	++++	++++	0.40857	6.83354e-11	0	0	0
cg01083050	1	18700899	IGSF21	N_Shelf	++++	++++	0.118833	6.85321e-11	0	0	0
cg09040078	16	23291476			++++	++++	1	6.90896e-11	0	0	0
cg02974204	16	86714765		N_Shore	++++	++++	1	6.99749e-11	0	0	0
cg05429527	6	1596122		N_Shelf	++++	++++	1	7.00733e-11	0	0	0
cg05610131	13	112870576			++++	++++	1	7.08275e-11	0	0	0
cg06222383	11	1242166			++++	++++	0.415784	7.09914e-11	0	0	0
cg16354802	20	42955781		S_Shore	++++	++++	1	7.18112e-11	0	0	0
cg00035847	1	29557016	MECR;MECR	N_Shore	++++	++++	0.525632	7.20407e-11	0	0	0
cg16514113	16	34428061		N_Shelf	++++	++++	1	7.21719e-11	0	0	0
cg24167372	5	146888628		N_Shore	++++	++++	0.0555799	7.26637e-11	0	0	0
cg22076160	1	235805690	GNG4;GNG4;GNG4	Island	++++	++++	1	7.32868e-11	0	0	0
cg03051983	10	72044060		S_Shore	++++	++++	1	7.49919e-11	0	0	0
cg01053273	20	654458	SCRT2	N_Shore	++++	++++	0.481692	7.57461e-11	0	0	0
cg25803632	7	43151828	HECW1	N_Shore	++++	++++	0.254979	7.76807e-11	0	0	0
cg22229142	22	37447306	KCTD17	N_Shore	++++	++++	1	7.89267e-11	0	0	0
cg25315362	3	116164576	LSAMP		++++	++++	1	7.98449e-11	0	0	0
cg01427567	19	54676748	TMC4;TMC4		++++	++++	0.0804679	7.99104e-11	0	0	0
cg19965589	15	52043121	TMOD2;TMOD2;LYSMD2	N_Shore	++++	++++	1	8.03039e-11	0	0	0
cg02356702	13	114319334			++++	++++	0.262685	8.10581e-11	0	0	0
cg18335505	2	131514588	FAM123C;FAM123C;FAM123C;FAM123C	S_Shore	++++	++++	1	8.17795e-11	0	0	0
cg19964320	15	25096573	SNRPN;SNRPN;SNRPN	S_Shelf	++++	++++	1	8.18123e-11	0	0	0
cg22677858	1	201797722	IPO9	N_Shore	++++	++++	1	8.22386e-11	0	0	0
cg22481405	8	143551331	BAI1		++++	++++	0.0794186	8.24681e-11	0	0	0
cg23730558	8	10865623	XKR6		++++	++++	0.184873	8.45011e-11	0	0	0
cg24815853	19	51538416	KLK12;KLK12;KLK12	S_Shelf	++++	++++	0.0591869	8.58783e-11	0	0	0
cg25091367	4	7289507	SORCS2		++++	++++	0.704996	8.66981e-11	0	0	0
cg13229084	2	237148866	ASB18	S_Shelf	++++	++++	0.354793	8.71571e-11	0	0	0
cg19706795	7	24797839	DFNA5;DFNA5;DFNA5	S_Shore	++++	++++	0.244552	9.18462e-11	0	1	1
cg06276088	6	158956970	TMEM181	N_Shore	++++	++++	0.454476	9.21741e-11	0	0	0
cg00535027	4	8593933	CPZ;CPZ;CPZ	N_Shore	++++	++++	0.390535	9.3125e-11	0	0	0
cg15125981	2	121418922			++++	++++	0.569899	9.83715e-11	0	0	0
cg09690449	4	187998952			++++	++++	0.0962729	1.03585e-10	0	0	0
cg22679316	12	54396990	HOXC9	N_Shelf	++++	++++	0.113291	1.0411e-10	0	0	0
cg01065599	21	38075171	SIM2;SIM2	N_Shore	++++	++++	1	1.0634e-10	0	0	0
cg12527110	4	163907607			++++	++++	0.434802	1.07291e-10	0	0	0
cg06530903	16	87633337		N_Shelf	++++	++++	1	1.08897e-10	0	0	0
cg18538340	3	132756780	TMEM108;TMEM108	N_Shore	++++	++++	0.0850258	1.09356e-10	0	0	1
cg25755191	1	167013332			++++	++++	1	1.16964e-10	0	0	0
cg00892368	6	32847704	PPP1R2P1	Island	++++	++++	1	1.17751e-10	0	0	0
cg08993878	12	98151379			++++	++++	0.512843	1.17751e-10	0	0	0
cg03027739	7	127805680		N_Shore	++++	++++	0.175626	1.18406e-10	1	1	0
cg01217350	4	152475308	FAM160A1		++++	++++	0.191398	1.19456e-10	0	0	0
cg25196975	11	124738119	ROBO3	N_Shore	++++	++++	0.0741065	1.22473e-10	0	0	1
cg17718036	6	27219983	PRSS16	S_Shore	++++	++++	1	1.22505e-10	0	0	0
cg24299548	8	33792227			++++	++++	1	1.22833e-10	0	0	0
cg19435188	2	236293467		Island	++++	++++	0.373812	1.23227e-10	0	0	0
cg22282038	8	41505495	NKX6-3	S_Shore	++++	++++	1	1.23587e-10	0	0	0
cg13423235	4	7486195	SORCS2	S_Shore	++++	++++	0.0701389	1.25784e-10	0	0	0
cg26550938	1	3827428	LOC100133612	S_Shelf	++++	++++	0.830255	1.26047e-10	0	0	0
cg21665747	11	70967143		S_Shelf	++++	++++	0.298853	1.2844e-10	0	0	0
cg20391126	7	127831430			++++	++++	0.122964	1.29195e-10	0	0	1
cg19796640	17	72848197	GRIN2C	Island	++++	++++	1	1.31129e-10	0	0	0
cg19041593	19	58899370	RPS5	S_Shore	++++	++++	0.0666959	1.31293e-10	0	0	0
cg00305071	1	34504017	CSMD2		++++	++++	0.0640726	1.329e-10	0	0	0
cg07927540	6	169049163	SMOC2;SMOC2		++++	++++	0.0879113	1.33031e-10	0	0	0
cg23856611	2	236409849	AGAP1;AGAP1		++++	++++	0.174872	1.34146e-10	0	0	0
cg00352576	9	135454197		N_Shore	++++	++++	1	1.34474e-10	0	0	0
cg26458452	7	140341135		Island	++++	++++	1	1.39032e-10	0	0	0
cg14325092	5	174872330	DRD1	Island	++++	++++	1	1.39884e-10	0	0	0
cg25813109	20	32900076	AHCY		++++	++++	0.172216	1.4077e-10	0	0	0
cg26270027	11	120983944	TECTA		++++	++++	1	1.42835e-10	0	0	0
cg18784903	7	1337353		Island	++++	++++	0.0662368	1.4359e-10	0	0	0
cg14162806	22	39641406	PDGFB	S_Shore	++++	++++	0.0821402	1.43786e-10	0	0	0
cg16978004	15	25330242	SNORD116-17;SNORD116-18;SNORD116-19		++++	++++	0.803367	1.45196e-10	0	0	0
cg27396056	3	188664993		N_Shore	++++	++++	1	1.45557e-10	0	0	0
cg10257905	17	12568092	MYOCD;MYOCD	N_Shore	++++	++++	1	1.46213e-10	0	0	0
cg04505435	11	70672511	SHANK2	N_Shore	++++	++++	0.168838	1.46967e-10	0	0	1
cg18080509	6	74009455	C6orf147	Island	++++	++++	1	1.46967e-10	0	0	0
cg01871907	19	2703055	GNG7	S_Shore	++++	++++	1	1.47065e-10	0	0	0
cg03129884	2	95692727	MAL;MAL;MAL;MAL	S_Shore	++++	++++	0.525304	1.47295e-10	0	0	0
cg25487047	5	140389945	PCDHA9;PCDHA6;PCDHA6;PCDHA4;PCDHA13;PCDHAC1;PCDHA10;PCDHA8;PCDHA3;PCDHA1;PCDHA10;PCDHA5;PCDHA12;PCDHA1;PCDHAC2;PCDHA2;PCDHA7;PCDHA11		++++	++++	1	1.4782e-10	0	0	0
cg08112929	15	100672325	ADAMTS17		++++	++++	0.170511	1.49853e-10	0	0	0
cg04053417	16	86232052			++++	++++	0.273833	1.51787e-10	0	0	0
cg14331029	14	96658912			++++	++++	0.445623	1.52476e-10	0	0	0
cg05154856	1	54205843		S_Shore	++++	++++	0.555799	1.53984e-10	0	0	0
cg09685982	1	78956458	PTGFR;PTGFR	N_Shore	++++	++++	1	1.55558e-10	0	0	0
cg26891150	15	79575634	ANKRD34C	N_Shore	++++	++++	0.140343	1.56706e-10	0	0	0
cg15752343	10	124904190		N_Shore	++++	++++	0.148967	1.62575e-10	0	0	0
cg20066612	1	160050948	KCNJ9	N_Shelf	++++	++++	1	1.63789e-10	0	0	0
cg06842071	2	233499460	EFHD1;EFHD1	Island	++++	++++	1	1.65395e-10	0	0	0
cg10135717	15	100882647	ADAMTS17	S_Shore	++++	++++	0.114865	1.66149e-10	0	0	0
cg15418593	14	97492133			++++	++++	0.443328	1.67625e-10	0	0	0
cg24785473	3	35681883		S_Shore	++++	++++	0.120177	1.70215e-10	0	0	0
cg22895231	19	45311868	BCAM;BCAM	N_Shore	++++	++++	0.111127	1.73986e-10	0	0	0
cg00562430	8	66475106			++++	++++	0.50399	1.78184e-10	0	0	0
cg12653570	1	35392942		N_Shore	++++	++++	0.489562	1.79167e-10	0	0	0
cg00401745	2	131673963	ARHGEF4;ARHGEF4	Island	++++	++++	1	1.79692e-10	0	0	0
cg25541259	2	230576135	DNER	N_Shore	++++	++++	1	1.80971e-10	0	0	0
cg21911858	19	57154095		N_Shore	++++	++++	0.396437	1.82709e-10	0	0	0
cg02239830	7	1360629		N_Shelf	++++	++++	1	1.86709e-10	0	0	0
cg15150970	2	25473529	DNMT3A;DNMT3A;DNMT3A	N_Shore	++++	++++	1	1.89103e-10	0	0	0
cg02350320	1	33546151	ADC	N_Shore	++++	++++	0.156673	1.89627e-10	0	0	0
cg24122922	20	24449392	TMEM90B	N_Shore	++++	++++	1	1.90972e-10	0	0	0
cg18014983	6	29618382		S_Shore	++++	++++	0.205105	1.91333e-10	0	0	0
cg09514185	10	1712988	ADARB2		++++	++++	1	1.93497e-10	0	0	0
cg21739816	4	3746443		N_Shore	++++	++++	1	1.95726e-10	0	0	0
cg03695613	20	43936663	RBPJL;MATN4;MATN4;MATN4	S_Shore	++++	++++	1	1.98186e-10	0	0	0
cg01811100	1	40158476	HPCAL4	Island	++++	++++	0.931906	1.98251e-10	0	0	0
cg16547341	19	57630691	USP29	S_Shore	++++	++++	0.213335	2.00055e-10	0	0	1
cg02962521	18	19744694		N_Shore	++++	++++	1	2.02481e-10	0	0	0
cg01693328	7	108101162		S_Shelf	++++	++++	0.0526615	2.08482e-10	0	0	0
cg18115407	19	12941371	RTBDN;RTBDN	N_Shore	++++	++++	1	2.09269e-10	0	0	0
cg10525820	16	46877831		Island	++++	++++	0.0985027	2.10089e-10	0	0	0
cg12033029	2	149856468	KIF5C		++++	++++	0.08296	2.10482e-10	0	0	0
cg22237668	12	114682739			++++	++++	0.512188	2.10646e-10	0	0	0
cg22548353	19	36195268		Island	++++	++++	1	2.11302e-10	0	0	0
cg16858125	1	43834757	ELOVL1	S_Shore	++++	++++	1	2.12384e-10	0	0	0
cg26180263	14	58429389			++++	++++	0.0778774	2.1363e-10	0	0	0
cg21903395	12	130087444	TMEM132D		++++	++++	0.573834	2.16155e-10	0	0	0
cg06432119	11	281516	NLRP6	Island	++++	++++	0.759756	2.1727e-10	0	0	0
cg05184394	2	131512773	FAM123C;FAM123C;FAM123C;FAM123C	N_Shore	++++	++++	0.0901739	2.18221e-10	0	0	0
cg07899016	5	140588299	PCDHB12;PCDHB12	N_Shore	++++	++++	1	2.20975e-10	0	0	0
cg03258472	19	6463949	CRB3;CRB3	N_Shore	++++	++++	0.503662	2.21303e-10	0	0	0
cg23632237	20	30560483	XKR7	S_Shelf	++++	++++	0.102831	2.21565e-10	0	0	0
cg02758987	7	100080527	C7orf51	N_Shore	++++	++++	1	2.22647e-10	0	0	0
cg00977696	8	144854517		Island	++++	++++	1	2.22877e-10	0	0	0
cg01709689	7	1452073		N_Shore	++++	++++	0.626626	2.24025e-10	0	1	1
cg18086868	1	220463627			++++	++++	1	2.29468e-10	0	0	0
cg05019423	14	105330230	KIAA0284;KIAA0284	N_Shore	++++	++++	0.627938	2.37141e-10	0	0	0
cg19246862	11	706635	EPS8L2	S_Shore	++++	++++	1	2.37797e-10	0	0	0
cg23328852	5	132946269	FSTL4	N_Shore	++++	++++	0.143655	2.38584e-10	0	0	0
cg27647054	16	754883	FBXL16	N_Shore	++++	++++	0.157591	2.38846e-10	0	0	0
cg02340556	17	46797764		S_Shore	++++	++++	1	2.38912e-10	0	0	0
cg17098387	6	160661939	SLC22A2		++++	++++	0.222844	2.39633e-10	0	0	0
cg16287252	12	129417324	GLT1D1		++++	++++	0.714177	2.4101e-10	0	0	0
cg11158819	3	183817853	HTR3E		++++	++++	0.324921	2.42453e-10	0	0	0
cg04490037	7	50633773	DDC		++++	++++	0.227041	2.44716e-10	0	0	0
cg07859640	5	140480507	PCDHB3	N_Shore	++++	++++	0.964041	2.47863e-10	0	0	0
cg03468072	12	39539422		Island	++++	++++	1	2.49536e-10	0	0	0
cg19997946	6	166399986	C6orf176;C6orf176;LOC441177	N_Shore	++++	++++	0.666959	2.5088e-10	0	0	0
cg12197457	6	160554674	SLC22A1;SLC22A1	Island	++++	++++	0.0746312	2.52225e-10	0	0	0
cg09225457	7	8479893	NXPH1	N_Shelf	++++	++++	0.079517	2.56127e-10	0	0	0
cg00010932	2	170680664	METTL5	N_Shore	++++	++++	1	2.60848e-10	0	0	0
cg06095115	16	78056626	CLEC3A		++++	++++	1	2.61144e-10	0	0	0
cg23411103	3	172169176		S_Shore	++++	++++	0.388567	2.62488e-10	0	0	0
cg13456086	8	110704757	GOLSYN;GOLSYN	S_Shore	++++	++++	0.342661	2.62652e-10	0	0	0
cg16300419	17	36666154	ARHGAP23	Island	++++	++++	0.768937	2.64718e-10	0	0	0
cg05928053	2	182549565		S_Shore	++++	++++	1	2.65111e-10	0	0	0
cg09682949	7	1336246		N_Shore	++++	++++	1	2.658e-10	0	0	0
cg12646804	5	2008188		Island	++++	++++	0.335447	2.70423e-10	0	0	0
cg03667083	7	30721010	CRHR2	N_Shore	++++	++++	1	2.70751e-10	0	0	0
cg06850159	10	84157607	NRG3;NRG3;NRG3		++++	++++	1	2.71177e-10	0	0	0
cg01615861	16	85513978			++++	++++	0.645317	2.76162e-10	0	0	0
cg02544658	21	44876604		Island	++++	++++	0.192907	2.77899e-10	0	0	0
cg09597806	15	28351607		Island	++++	++++	0.484644	2.7849e-10	0	0	0
cg09487134	10	35195634			++++	++++	0.338726	2.78555e-10	0	0	0
cg07460010	2	176985174		N_Shore	++++	++++	1	2.80424e-10	0	0	0
cg25030262	15	25092069	SNRPN;SNRPN;SNRPN	N_Shore	++++	++++	0.188414	2.80621e-10	0	0	0
cg27576576	7	156786077			++++	++++	1	2.81375e-10	0	0	0
cg22124136	13	34391985	RFC3;RFC3	N_Shore	++++	++++	0.116537	2.82556e-10	0	0	0
cg13266292	19	1438084	RPS15	N_Shore	++++	++++	1	2.85277e-10	0	0	0
cg19701213	19	42817154	TMEM145	N_Shore	++++	++++	0.100765	2.8731e-10	0	0	0
cg04350421	22	39634647	PDGFB;PDGFB	N_Shelf	++++	++++	0.154837	2.90294e-10	0	0	0
cg15309953	2	5813258		N_Shore	++++	++++	0.0985027	2.90393e-10	0	0	0
cg21300318	19	4769206	MIR7-3;C19orf30		++++	++++	0.350203	2.91573e-10	0	0	0
cg01620785	2	27436111	SLC5A6;C2orf28;SLC5A6;C2orf28;C2orf28	S_Shore	++++	++++	1	2.99017e-10	0	0	0
cg06552969	16	88453808		Island	++++	++++	1	2.99115e-10	0	0	0
cg24790788	3	145879626	PLOD2;PLOD2	S_Shore	++++	++++	0.948301	2.99377e-10	1	0	1
cg07211768	12	115102290		N_Shore	++++	++++	0.330856	3.02656e-10	0	0	0
cg06014588	15	88801339		S_Shore	++++	++++	0.204613	3.05247e-10	0	0	0
cg10418997	5	113014291			++++	++++	0.711882	3.05607e-10	0	0	0
cg05048426	14	105843098	PACS2;PACS2		++++	++++	1	3.07214e-10	0	0	0
cg22473846	5	38846743	OSMR;OSMR	S_Shore	++++	++++	1	3.11018e-10	0	0	0
cg03331387	3	127114962			++++	++++	0.113029	3.11346e-10	0	0	0
cg05132262	7	1428859			++++	++++	1	3.12297e-10	0	0	0
cg24076083	19	12946093	RTBDN;RTBDN	S_Shore	++++	++++	1	3.17445e-10	0	0	0
cg02526277	11	18230620	LOC494141;LOC494141;LOC494141	Island	++++	++++	0.656466	3.19642e-10	0	0	0
cg17042683	20	53096513	DOK5	S_Shelf	++++	++++	0.532846	3.20921e-10	0	0	0
cg19480425	22	22339538		S_Shelf	++++	++++	0.267374	3.23675e-10	0	0	0
cg12591791	12	132970228		S_Shore	++++	++++	0.24101	3.26987e-10	0	0	0
cg02878414	2	71099177		S_Shore	++++	++++	0.131949	3.27708e-10	0	0	0
cg13890649	9	79629843		N_Shore	++++	++++	0.0707619	3.30528e-10	0	0	0
cg22676212	19	47910108	MEIS3;MEIS3	Island	++++	++++	0.786972	3.33807e-10	0	0	1
cg24141663	1	203095747	ADORA1;ADORA1	N_Shore	++++	++++	0.0665975	3.41349e-10	0	0	0
cg06657409	11	62752264	SLC22A6;SLC22A6;SLC22A6;SLC22A6;SLC22A6;SLC22A6;SLC22A6;SLC22A6		++++	++++	1	3.42989e-10	0	0	0
cg07905696	6	5026164			++++	++++	1	3.45612e-10	0	0	0
cg10562586	2	210444154	MAP2;MAP2;MAP2;MAP2		++++	++++	1	3.4594e-10	0	0	0
cg06289583	9	133309447		Island	++++	++++	0.563669	3.51514e-10	0	0	0
cg19532307	3	164912664	SLITRK3		++++	++++	1	3.51842e-10	0	0	0
cg02237906	17	72667743	RAB37	S_Shore	++++	++++	0.120964	3.54465e-10	0	0	0
cg00849052	8	23570444		N_Shore	++++	++++	1	3.55777e-10	0	0	0
cg01862160	9	135456402		Island	++++	++++	1	3.56433e-10	0	0	0
cg04221764	5	177410766		N_Shore	++++	++++	1	3.57089e-10	0	0	0
cg12634276	4	53578311	SNORA26;KIAA0114	N_Shore	++++	++++	0.0723031	3.60368e-10	0	0	0
cg00943382	7	156786185			++++	++++	1	3.62663e-10	0	0	0
cg20417869	20	61785868		N_Shelf	++++	++++	0.18002	3.65286e-10	0	0	0
cg13670091	6	143723025			++++	++++	1	3.65614e-10	0	0	0
cg06777844	8	41161995	SFRP1	N_Shelf	++++	++++	1	3.67909e-10	0	0	0
cg06989610	12	54451877	FLJ12825	N_Shelf	++++	++++	0.436442	3.69221e-10	0	0	1
cg22514756	1	156426017		N_Shore	++++	++++	0.151197	3.75123e-10	0	0	0
cg26264769	6	27521330			++++	++++	0.220516	3.76107e-10	0	0	0
cg00063006	6	32847530	PPP1R2P1	Island	++++	++++	0.204088	3.79058e-10	0	0	0
cg06716283	19	45504390	RELB	N_Shore	++++	++++	0.317937	3.82009e-10	0	0	0
cg18105979	5	180045822	FLT4;FLT4	Island	++++	++++	0.261045	3.866e-10	0	0	0
cg16532016	10	50887058	C10orf53;C10orf53	N_Shore	++++	++++	1	3.91191e-10	0	0	0
cg00502444	7	158959916		N_Shelf	++++	++++	1	3.94142e-10	0	0	0
cg23606718	2	131513927	FAM123C;FAM123C;FAM123C;FAM123C;FAM123C;FAM123C	Island	++++	++++	0.152345	3.94142e-10	0	0	0
cg04943225	2	47799165		Island	++++	++++	0.321904	3.99388e-10	0	0	0
cg10028549	4	7941894	AFAP1;AFAP1	S_Shore	++++	++++	1	4.007e-10	0	0	0
cg13738494	11	61309911	SYT7		++++	++++	0.367254	4.01028e-10	0	0	0
cg01396022	3	9811990	CAMK1	S_Shore	++++	++++	0.405946	4.01028e-10	0	0	0
cg20378070	6	30641179	DHX16;DHX16	S_Shore	++++	++++	0.846979	4.05618e-10	0	0	0
cg22655767	20	39312602		S_Shore	++++	++++	1	4.07914e-10	0	0	0
cg14893274	19	15834209		S_Shore	++++	++++	1	4.08898e-10	0	0	0
cg05120987	16	79623900		Island	++++	++++	0.0533829	4.10865e-10	0	0	0
cg15544071	5	38528510	LIFR;LIFR		++++	++++	0.12303	4.11193e-10	0	0	0
cg06565253	17	38518714	GJD3;GJD3	N_Shore	++++	++++	1	4.11521e-10	0	0	0
cg06290884	3	42581432		S_Shelf	++++	++++	0.212974	4.15128e-10	0	0	0
cg07629165	21	45845365	TRPM2	Island	++++	++++	0.0603345	4.19063e-10	0	0	0
cg03630015	2	219747459	WNT10A	N_Shore	++++	++++	1	4.1939e-10	0	0	1
cg10976908	15	72610141	BRUNOL6	N_Shore	++++	++++	1	4.21686e-10	0	0	0
cg24317585	1	1936611	KIAA1751	S_Shore	++++	++++	1	4.23653e-10	0	0	0
cg26674479	7	27281415	EVX1	N_Shore	++++	++++	1	4.26277e-10	0	0	0
cg21342728	22	41075673	MCHR1		++++	++++	0.195464	4.26604e-10	0	0	0
cg11560197	5	140182956	PCDHA2;PCDHA1;PCDHA3;PCDHA3;PCDHA1	Island	++++	++++	1	4.34474e-10	0	0	0
cg11419047	6	31914965	CFB		++++	++++	0.080599	4.37753e-10	0	0	0
cg17523769	5	19988666	CDH18;CDH18		++++	++++	1	4.41688e-10	0	0	0
cg19363607	7	98097019		N_Shelf	++++	++++	0.500055	4.43983e-10	0	0	0
cg11999255	2	18058717	KCNS3	N_Shore	++++	++++	0.924036	4.45295e-10	0	0	0
cg13398470	8	27862840			++++	++++	0.926004	4.48902e-10	0	0	0
cg24684497	12	49717669	TROAP;TROAP	S_Shore	++++	++++	1	4.52837e-10	0	0	0
cg01923514	20	31781277	BASE		++++	++++	0.740082	4.54804e-10	0	0	0
cg11789492	16	1204217	CACNA1H;CACNA1H	Island	++++	++++	0.390207	4.59723e-10	0	0	0
cg07089275	16	1129990	SSTR5;LOC146336;SSTR5	Island	++++	++++	1	4.63658e-10	0	0	0
cg05459233	3	88050165			++++	++++	1	4.64641e-10	0	0	0
cg27431671	11	72810801	FCHSD2		++++	++++	0.159165	4.6956e-10	0	0	0
cg11588844	2	11133327			++++	++++	0.235567	4.76118e-10	0	0	0
cg12655437	18	45275903		S_Shore	++++	++++	0.301082	4.76118e-10	0	0	0
cg23641707	2	151341348	RND3	N_Shore	++++	++++	0.215794	4.81037e-10	0	0	0
cg21739934	11	116371391		Island	++++	++++	0.0880753	4.82676e-10	0	0	0
cg02618061	5	92913741	FLJ42709;FLJ42709	N_Shore	++++	++++	1	4.8366e-10	0	0	0
cg16058990	6	30359364			++++	++++	0.164871	4.92841e-10	0	0	0
cg26807590	11	66057400	YIF1A	N_Shore	++++	++++	0.124145	4.93825e-10	0	0	0
cg22962236	10	132158329			++++	++++	0.964041	4.94809e-10	0	0	0
cg16995768	7	157531239	PTPRN2;PTPRN2;PTPRN2		++++	++++	1	4.9612e-10	0	0	0
cg00369376	2	182542510	NEUROD1		++++	++++	0.417751	4.96776e-10	0	0	0
cg03450046	11	66065174		S_Shelf	++++	++++	0.0913871	4.98088e-10	0	0	0
cg08290013	17	27334164	SEZ6;SEZ6	S_Shore	++++	++++	0.437097	4.99071e-10	0	0	0
cg21677075	6	21523451			++++	++++	0.055875	5.00055e-10	0	0	0
cg11400650	15	69328155	MIR548H4;NOX5	S_Shelf	++++	++++	0.297639	5.05957e-10	0	0	0
cg19237337	4	5990265	C4orf50		++++	++++	1	5.09564e-10	0	0	0
cg11480627	11	70672876	SHANK2	Island	++++	++++	1	5.17434e-10	0	0	1
cg23715667	17	79634303	C17orf90;CCDC137	S_Shore	++++	++++	1	5.21369e-10	0	0	0
cg07414492	20	3656411	ADAM33;ADAM33	S_Shore	++++	++++	1	5.21369e-10	0	0	0
cg18479961	7	150935476	MIR671;CHPF2	S_Shore	++++	++++	1	5.23336e-10	0	0	0
cg25836326	3	113898609	DRD3;DRD3		++++	++++	0.147197	5.23992e-10	0	0	0
cg17307791	4	26806179			++++	++++	0.984043	5.28583e-10	0	0	0
cg15080396	19	3879858	ATCAY	N_Shore	++++	++++	1	5.34813e-10	0	0	0
cg19771372	19	4153713	CREB3L3;CREB3L3		++++	++++	0.201039	5.40387e-10	0	0	0
cg07540634	14	67878142	PLEK2	N_Shore	++++	++++	1	5.43011e-10	0	0	0
cg14977875	5	2008364		Island	++++	++++	1	5.43339e-10	0	0	0
cg11151544	12	56135681	GDF11	N_Shore	++++	++++	0.254717	5.49897e-10	0	0	0
cg02102684	16	4421445	VASN;CORO7	N_Shore	++++	++++	0.817795	5.50552e-10	0	1	0
cg09083736	6	100049849		N_Shore	++++	++++	0.691552	5.5088e-10	0	0	0
cg05022087	14	62407567			++++	++++	0.764674	5.52848e-10	0	0	0
cg03437675	12	110271625	TRPV4;TRPV4	S_Shore	++++	++++	1	5.53504e-10	0	0	0
cg02400092	11	130185384	ZBTB44	S_Shore	++++	++++	1	5.55143e-10	0	0	0
cg19670431	4	7436874	PSAPL1;SORCS2		++++	++++	1	5.59734e-10	0	0	0
cg07384708	19	372718	THEG;THEG	N_Shelf	++++	++++	1	5.60062e-10	0	0	0
cg27132080	5	168729267	SLIT3	S_Shore	++++	++++	0.951252	5.67931e-10	0	0	0
cg25220765	4	3766656		N_Shore	++++	++++	0.14054	5.69571e-10	0	0	0
cg01655356	11	70672841	SHANK2	Island	++++	++++	1	5.81376e-10	0	0	1
cg23643526	1	119930673	HAO2;HAO2		++++	++++	1	5.89573e-10	0	0	0
cg05073130	7	150715634	ATG9B	Island	++++	++++	0.0920429	5.92196e-10	0	0	0
cg18779296	4	41878119		N_Shelf	++++	++++	0.136048	5.92196e-10	0	0	0
cg21220520	14	57960464	C14orf105;C14orf105		++++	++++	1	5.94164e-10	0	0	0
cg12764532	13	112998887		S_Shore	++++	++++	1	5.95475e-10	0	0	0
cg14955916	10	459968	DIP2C	Island	++++	++++	1	5.95803e-10	0	0	0
cg01176949	13	114071708		S_Shelf	++++	++++	1	6.03017e-10	0	0	0
cg10882226	10	50977288		S_Shore	++++	++++	1	6.07936e-10	0	1	1
cg20671534	2	220174629	PTPRN	S_Shore	++++	++++	0.107651	6.09247e-10	0	0	0
cg03073429	10	125506257	CPXM2		++++	++++	0.605968	6.10231e-10	0	0	0
cg24951754	12	132676717		S_Shore	++++	++++	1	6.12199e-10	0	0	0
cg07516091	19	47951619	SLC8A2	S_Shore	++++	++++	1	6.19085e-10	0	0	0
cg15602420	1	20205059		N_Shelf	++++	++++	1	6.1974e-10	0	0	0
cg22006708	8	11451194			++++	++++	0.406274	6.21708e-10	0	0	0
cg23513363	10	43817997		N_Shore	++++	++++	0.149656	6.24003e-10	0	0	0
cg08285915	5	134872957	NEUROG1	S_Shore	++++	++++	0.335119	6.36792e-10	0	0	0
cg13587477	10	102431136		S_Shore	++++	++++	0.311674	6.38103e-10	0	0	0
cg16400495	12	54385625	MIR196A2	N_Shelf	++++	++++	1	6.38103e-10	0	0	0
cg19428160	11	17761718	KCNC1;KCNC1	S_Shelf	++++	++++	1	6.42366e-10	0	0	0
cg02402706	5	176125405			++++	++++	1	6.54826e-10	0	0	0
cg05574141	11	129488650		S_Shore	++++	++++	1	6.58761e-10	0	0	0
cg12630596	5	112849156	YTHDC2	N_Shore	++++	++++	1	6.64336e-10	0	0	0
cg24764102	19	1677149		S_Shore	++++	++++	0.0700733	6.64663e-10	0	0	0
cg27510354	1	112429786	KCND3;KCND3		++++	++++	1	6.69254e-10	0	0	0
cg12073594	20	61903495	ARFGAP1;ARFGAP1	N_Shore	++++	++++	1	6.73845e-10	0	0	0
cg07583503	8	110988256	KCNV1	S_Shore	++++	++++	1	6.73845e-10	0	0	0
cg07881365	19	15833929		Island	++++	++++	1	6.74828e-10	0	0	0
cg23695880	17	40333758	KCNH4	S_Shore	++++	++++	0.313313	6.7614e-10	0	0	0
cg16686175	17	57642721	DHX40;DHX40	Island	++++	++++	0.101978	6.76468e-10	0	0	0
cg00478710	3	133392965		N_Shore	++++	++++	1	6.76468e-10	0	0	0
cg17489750	8	54504774		N_Shelf	++++	++++	0.0527599	6.80731e-10	0	0	0
cg08699681	10	135160713	PRAP1;PRAP1		++++	++++	0.895836	6.94831e-10	0	0	0
cg20292112	2	176963948	HOXD12	N_Shore	++++	++++	1	6.96798e-10	0	0	0
cg15372959	10	123922620	TACC2;TACC2;TACC2;TACC2	N_Shore	++++	++++	1	6.9811e-10	0	0	0
cg17355241	19	17445073	ANO8	Island	++++	++++	1	7.02045e-10	0	0	0
cg11324467	8	142047998			++++	++++	1	7.05979e-10	0	0	0
cg25661892	6	40567317		Island	++++	++++	1	7.09914e-10	0	0	0
cg19865134	17	27170041	C17orf63;C17orf63	S_Shore	++++	++++	0.097191	7.21391e-10	0	0	0
cg07967210	17	47022446	SNF8	S_Shore	++++	++++	1	7.22375e-10	0	0	0
cg24562149	20	11870817	BTBD3	N_Shore	++++	++++	1	7.26965e-10	0	0	0
cg09307264	17	4902281	INCA1;INCA1;KIF1C;INCA1;INCA1	S_Shore	++++	++++	0.486611	7.29917e-10	0	0	0
cg07440507	16	51685042			++++	++++	0.268095	7.30244e-10	0	0	0
cg11146916	8	143498452			++++	++++	1	7.41393e-10	0	0	0
cg20699323	8	133071588	OC90;OC90		++++	++++	1	7.48607e-10	0	0	0
cg02304233	1	147070522	BCL9	N_Shore	++++	++++	1	7.5123e-10	0	0	0
cg17465112	1	37720957			++++	++++	1	7.56149e-10	0	0	0
cg01074584	8	41168072	SFRP1	S_Shore	++++	++++	1	7.6074e-10	0	0	0
cg18199664	14	78869963	NRXN3		++++	++++	0.151164	7.81398e-10	0	0	0
cg13902024	7	131960464	PLXNA4		++++	++++	1	7.83693e-10	0	0	0
cg03504310	16	22827807	HS3ST2	S_Shore	++++	++++	1	7.90251e-10	0	0	0
cg01885071	14	90168304		Island	++++	++++	1	7.9976e-10	0	0	0
cg26480524	22	37824118	ELFN2	Island	++++	++++	0.856816	8.01728e-10	0	0	0
cg13621378	5	2638080			++++	++++	1	8.03039e-10	0	0	0
cg06159394	1	50887633	DMRTA2	Island	++++	++++	0.149492	8.14844e-10	0	0	0
cg23883874	8	10405415			++++	++++	0.187103	8.21074e-10	0	0	0
cg06816668	3	74664210		S_Shore	++++	++++	1	8.24681e-10	0	1	1
cg13565928	9	137969648	OLFM1;OLFM1	S_Shore	++++	++++	1	8.26976e-10	0	0	0
cg09265016	12	115170515		N_Shelf	++++	++++	1	8.296e-10	0	0	0
cg01781963	5	61028748			++++	++++	1	8.43372e-10	0	0	0
cg05098118	10	134900906	GPR123	N_Shore	++++	++++	1	8.45011e-10	0	0	0
cg04193160	1	228400419	OBSCN;OBSCN	Island	++++	++++	1	8.50913e-10	0	0	0
cg24000528	2	177013630	MIR10B	N_Shore	++++	++++	0.0644989	8.51897e-10	0	0	0
cg18996090	3	67022890			++++	++++	0.947645	8.65341e-10	0	0	0
cg03304664	2	151282496			++++	++++	1	8.73867e-10	0	0	0
cg01924084	5	145721152		N_Shore	++++	++++	0.675812	8.79441e-10	0	0	0
cg23484599	11	31831137	PAX6;PAX6;PAX6	N_Shore	++++	++++	0.151164	8.92885e-10	0	0	0
cg19246801	13	112630424		N_Shore	++++	++++	0.276949	8.97804e-10	0	0	0
cg14250450	10	124578544		S_Shore	++++	++++	1	9.07313e-10	0	0	0
cg16548261	11	66790373	SYT12	N_Shore	++++	++++	1	9.11576e-10	0	0	0
cg22541001	4	42402470	SHISA3	S_Shore	++++	++++	1	9.1715e-10	0	0	0
cg07918341	17	42992709	GFAP;GFAP	S_Shelf	++++	++++	1	9.22725e-10	0	0	0
cg16743754	7	57328785		S_Shelf	++++	++++	1	9.26987e-10	0	0	0
cg05783233	1	110694747	SLC6A17	S_Shore	++++	++++	0.0684994	9.36169e-10	0	0	0
cg19692314	1	45042285	RNF220		++++	++++	1	9.46334e-10	0	0	0
cg05210464	10	127349241	C10orf122		++++	++++	1	9.50597e-10	0	0	0
cg25349610	15	76470979	C15orf27		++++	++++	1	9.55187e-10	0	0	0
cg21509100	20	42965115	R3HDML		++++	++++	1	9.66008e-10	0	0	0
cg08993385	17	4938939	GPR172B;GPR172B		++++	++++	1	9.66336e-10	0	0	0
cg24462992	10	84502511	NRG3;NRG3;NRG3		++++	++++	0.056498	9.68631e-10	0	0	0
cg11147919	13	102069556	NALCN	S_Shore	++++	++++	1	9.72894e-10	0	0	0
cg23196346	10	24808256	KIAA1217;KIAA1217;KIAA1217		++++	++++	1	9.87978e-10	0	0	0
cg00155619	6	33173278	HSD17B8	S_Shore	++++	++++	1	9.9552e-10	0	0	0
cg18401406	13	37247537	C13orf36	N_Shore	++++	++++	1	9.96831e-10	0	0	0
cg00156995	13	41055588	LOC646982;LOC646982;LOC646982		++++	++++	0.256487	1.0047e-09	0	0	0
cg23075968	19	7293270	INSR;INSR	N_Shore	++++	++++	1	1.0106e-09	0	0	0
cg14654239	8	335341			++++	++++	0.210187	1.01683e-09	0	0	0
cg09737421	16	7855622			++++	++++	1	1.01847e-09	0	0	0
cg04526298	4	6540505			++++	++++	1	1.02208e-09	0	0	0
cg07444323	20	3654504	ADAM33;ADAM33	Island	++++	++++	1	1.02536e-09	0	0	0
cg25200182	1	158119395		N_Shore	++++	++++	0.924364	1.02897e-09	0	0	0
cg24873022	4	182905294			++++	++++	1	1.03552e-09	0	0	0
cg18007806	5	177423236	PROP1;PROP1		++++	++++	1	1.03848e-09	0	0	0
cg07902983	19	39694477	SYCN	Island	++++	++++	1	1.04274e-09	0	0	0
cg21656205	20	43439688	RIMS4	S_Shore	++++	++++	0.171757	1.04634e-09	0	0	0
cg21910650	6	42982891	MEA1;KLHDC3	S_Shore	++++	++++	0.152279	1.07356e-09	0	0	0
cg14323834	11	114702841			++++	++++	0.301181	1.07356e-09	0	0	0
cg03682366	2	239072199		Island	++++	++++	0.325347	1.07389e-09	0	0	0
cg19218607	12	49928924		N_Shelf	++++	++++	1	1.07422e-09	0	0	0
cg01217071	2	201450323	AOX1	N_Shore	++++	++++	0.110635	1.0752e-09	0	0	0
cg00108282	7	845047			++++	++++	1	1.09815e-09	0	0	0
cg05726109	22	19709755	SEPT5;GP1BB	Island	++++	++++	1	1.11094e-09	0	0	0
cg16287284	12	101580136	SLC5A8		++++	++++	1	1.1152e-09	0	0	0
cg21558341	6	33159547	COL11A2;COL11A2;COL11A2;COL11A2	N_Shore	++++	++++	0.203039	1.11586e-09	0	0	0
cg06962373	13	37772687			++++	++++	0.613838	1.11816e-09	0	0	0
cg17750038	1	15573525	FHAD1	N_Shore	++++	++++	0.213565	1.12439e-09	0	0	0
cg05838104	1	2559371	MMEL1	N_Shore	++++	++++	0.07027	1.12668e-09	0	0	0
cg07348854	13	112548306		S_Shore	++++	++++	1	1.12898e-09	0	0	0
cg00151250	8	91803412	NECAB1	N_Shore	++++	++++	1	1.1398e-09	0	0	0
cg27183726	19	34112306	CHST8;CHST8	Island	++++	++++	1	1.14045e-09	0	0	0
cg23158419	3	155838399	KCNAB1;KCNAB1		++++	++++	1	1.14963e-09	0	0	0
cg22651493	17	35242447			++++	++++	1	1.15587e-09	0	0	0
cg03914922	5	87985200		N_Shore	++++	++++	1	1.16997e-09	0	0	0
cg08706575	11	122525907	UBASH3B	N_Shore	++++	++++	0.758444	1.17652e-09	0	0	0
cg11697038	1	27931284	AHDC1	S_Shore	++++	++++	0.772216	1.18111e-09	0	0	0
cg02695873	7	127741520		N_Shelf	++++	++++	1	1.18144e-09	0	0	0
cg04457631	4	7736753	SORCS2		++++	++++	1	1.19062e-09	0	0	0
cg23448153	19	46418941	NANOS2	S_Shore	++++	++++	1	1.21259e-09	0	0	0
cg24798603	12	110010952	MVK;MMAB;MVK	N_Shore	++++	++++	1	1.2162e-09	0	0	0
cg00577449	3	127633887		N_Shore	++++	++++	0.235403	1.22636e-09	0	1	1
cg06122518	1	168356673			++++	++++	0.135392	1.23587e-09	0	0	0
cg16211174	7	27249651		N_Shelf	++++	++++	0.158116	1.24276e-09	0	0	0
cg01827781	16	29875145	LOC440356;LOC440356;CDIPT	S_Shore	++++	++++	1	1.24309e-09	0	0	0
cg04323785	20	21698033		S_Shelf	++++	++++	1	1.24538e-09	0	0	1
cg11353748	4	8159729	ABLIM2;ABLIM2;ABLIM2;ABLIM2;ABLIM2;ABLIM2;ABLIM2	Island	++++	++++	1	1.24702e-09	0	0	0
cg11243029	1	85929755	DDAH1;DDAH1	N_Shore	++++	++++	0.218516	1.25325e-09	0	0	0
cg12544557	17	39019545	KRT12	Island	++++	++++	1	1.25424e-09	0	0	0
cg08419918	11	118993093	HINFP;HINFP	S_Shore	++++	++++	1	1.26178e-09	0	0	0
cg10294474	16	49090004			++++	++++	0.220549	1.26735e-09	0	0	0
cg20780880	6	8103084	EEF1E1;EEF1E1	S_Shore	++++	++++	1	1.2726e-09	0	0	0
cg19712652	2	239865213			++++	++++	0.859439	1.27981e-09	0	0	0
cg26085533	17	32950846	TMEM132E	N_Shelf	++++	++++	0.0606296	1.28276e-09	0	0	0
cg26609642	17	77788310		Island	++++	++++	0.0763035	1.29752e-09	0	0	0
cg02814552	15	27960031			++++	++++	1	1.30309e-09	0	0	0
cg12833011	5	169930535	KCNIP1;KCNIP1;KCNIP1	N_Shore	++++	++++	1	1.30834e-09	0	0	0
cg03547905	8	38614044	TACC1	N_Shore	++++	++++	0.185561	1.30965e-09	0	0	0
cg10940023	12	119420927	SRRM4	S_Shore	++++	++++	1	1.32834e-09	0	0	0
cg10784813	16	11348678	SOCS1	Island	++++	++++	1	1.329e-09	0	0	0
cg14074184	10	133837230			++++	++++	1	1.33359e-09	0	0	0
cg18124413	18	43547806	KIAA1632	S_Shore	++++	++++	0.145164	1.33621e-09	0	0	0
cg17524136	11	84028382	DLG2;DLG2		++++	++++	0.115947	1.34441e-09	0	0	0
cg24146090	9	71939349	FAM189A2	N_Shore	++++	++++	1	1.35097e-09	0	0	0
cg00401939	6	14397330			++++	++++	0.209531	1.35589e-09	0	0	0
cg15328271	1	165513699	LRRC52;LOC400794		++++	++++	1	1.37622e-09	0	0	0
cg03489492	19	7699751	PCP2	N_Shore	++++	++++	0.146016	1.3772e-09	0	0	0
cg14471244	14	80677608	DIO2;DIO2;DIO2		++++	++++	1	1.38802e-09	0	0	0
cg14442890	6	26502192	BTN1A1	S_Shore	++++	++++	0.0930594	1.40114e-09	0	0	0
cg04285666	5	122422863		N_Shore	++++	++++	0.0500383	1.40245e-09	0	0	0
cg02120611	16	51909878			++++	++++	1	1.40376e-09	0	0	0
cg08178168	22	35934864		N_Shore	++++	++++	0.068401	1.40671e-09	0	0	0
cg23041045	1	109255480	FNDC7		++++	++++	0.109979	1.40737e-09	0	0	0
cg02171435	7	27451047			++++	++++	1	1.40934e-09	0	0	0
cg08876943	5	1865843			++++	++++	1	1.41229e-09	0	0	0
cg02424123	17	4938652	GPR172B;GPR172B;GPR172B;GPR172B		++++	++++	1	1.41524e-09	0	0	0
cg07792094	19	38717239	DPF1	N_Shore	++++	++++	1	1.42475e-09	0	0	0
cg07428958	11	74956892		S_Shelf	++++	++++	0.24442	1.42835e-09	0	0	0
cg07303450	16	30023400	DOC2A	S_Shore	++++	++++	0.948957	1.44147e-09	0	0	0
cg17512187	2	85082845	C2orf89		++++	++++	0.535797	1.44934e-09	0	0	0
cg19634573	10	126397072	FAM53B		++++	++++	0.0503662	1.45229e-09	0	0	0
cg04853708	7	5552734	FBXL18	N_Shore	++++	++++	1	1.45688e-09	0	0	0
cg27546840	16	86368285	LOC732275		++++	++++	1	1.46639e-09	0	0	0
cg09197761	15	57026315	ZNF280D;ZNF280D;ZNF280D	S_Shore	++++	++++	1	1.4677e-09	0	0	0
cg16246747	2	111491205	ACOXL;ACOXL;ACOXL	S_Shore	++++	++++	1	1.46803e-09	0	0	0
cg00359661	6	7725787	BMP6	N_Shore	++++	++++	0.3302	1.47262e-09	0	0	0
cg19596468	4	4864110	MSX1	N_Shore	++++	++++	1	1.47393e-09	0	0	0
cg11362013	5	3709695			++++	++++	1	1.48279e-09	0	0	0
cg13994680	15	71573101	THSD4		++++	++++	1	1.51558e-09	0	0	0
cg20446948	11	15963167		Island	++++	++++	1	1.51558e-09	0	0	0
cg25316310	4	48988801	CWH43	Island	++++	++++	1	1.5241e-09	0	0	0
cg17680088	9	127213319	GPR144	N_Shore	++++	++++	1	1.52574e-09	0	0	0
cg14417760	15	27111749	GABRA5;GABRA5	N_Shore	++++	++++	0.215729	1.53164e-09	0	0	0
cg05082311	17	8313457			++++	++++	1	1.53787e-09	0	0	0
cg10350263	10	106396576		N_Shelf	++++	++++	1	1.54115e-09	0	0	0
cg07579123	1	64323322	ROR1;ROR1		++++	++++	1	1.55263e-09	0	0	0
cg01354588	15	71657141	THSD4		++++	++++	1	1.55493e-09	0	0	0
cg26068079	8	32505200	NRG1;NRG1;NRG1;NRG1;NRG1;NRG1;NRG1;NRG1;NRG1;NRG1;NRG1;NRG1;NRG1;NRG1;NRG1;NRG1;NRG1		++++	++++	0.0629578	1.57657e-09	0	0	0
cg03459531	20	39996177	EMILIN3	S_Shore	++++	++++	1	1.5769e-09	0	0	0
cg19114050	15	52405026	BCL2L10	S_Shore	++++	++++	1	1.57952e-09	0	0	0
cg17677987	17	13018217			++++	++++	0.312231	1.57952e-09	0	0	0
cg16180353	11	31819219	PAX6;PAX6;PAX6	N_Shore	++++	++++	0.0542355	1.58116e-09	0	0	0
cg16021217	3	25197710			++++	++++	0.0975517	1.6251e-09	0	0	0
cg24405999	3	133393119		Island	++++	++++	1	1.62903e-09	0	0	0
cg21953146	17	44061258	MAPT;MAPT;MAPT;MAPT;MAPT;MAPT	S_Shore	++++	++++	0.0592524	1.63625e-09	0	0	0
cg11245681	5	176166754		N_Shelf	++++	++++	1	1.651e-09	0	1	0
cg05060440	2	184395412			++++	++++	1	1.65953e-09	0	0	0
cg25029998	17	77147396	HRNBP3		++++	++++	0.629906	1.66149e-09	0	0	0
cg14384224	9	140031310		N_Shore	++++	++++	0.354137	1.66936e-09	0	0	0
cg07164659	8	22526889	BIN3	S_Shore	++++	++++	1	1.67494e-09	0	0	0
cg19681793	6	169651645	THBS2	S_Shelf	++++	++++	1	1.67625e-09	0	0	0
cg18015787	1	18691875	IGSF21	Island	++++	++++	0.311149	1.68412e-09	0	0	0
cg22858394	2	237069779		S_Shore	++++	++++	0.172544	1.68478e-09	0	0	0
cg02363766	5	2008270		Island	++++	++++	1	1.68543e-09	0	0	0
cg10378667	12	122326303	PSMD9	N_Shore	++++	++++	1	1.70773e-09	0	0	0
cg13508369	9	129884026	ANGPTL2;RALGPS1		++++	++++	0.153296	1.70937e-09	0	0	0
cg12078933	19	12781150	C19orf56;MORG1;MORG1;MORG1	S_Shore	++++	++++	0.39906	1.71002e-09	0	0	1
cg02602550	16	55360333	IRX6	S_Shore	++++	++++	0.193661	1.71888e-09	0	0	0
cg21390082	17	33842255	SLFN12L		++++	++++	1	1.72281e-09	0	0	0
cg05941864	1	22893978	EPHA8;EPHA8	S_Shelf	++++	++++	1	1.74642e-09	0	0	0
cg25011003	1	22470341	WNT4	S_Shore	++++	++++	1	1.75298e-09	0	0	0
cg07363697	11	134945848			++++	++++	1	1.7943e-09	0	0	0
cg05837435	10	118609965		S_Shore	++++	++++	0.128375	1.81233e-09	0	0	0
cg13721169	12	108168824	ASCL4;ASCL4	N_Shore	++++	++++	0.262422	1.8284e-09	0	0	0
cg20971147	1	14866944			++++	++++	0.107291	1.86873e-09	0	0	0
cg00381622	16	56677855	MT1DP;MT1DP	S_Shore	++++	++++	0.432835	1.95694e-09	0	0	0
cg14924473	15	73667786			++++	++++	1	1.95989e-09	0	0	0
cg24126630	8	1110039		N_Shelf	++++	++++	0.106799	1.96481e-09	0	0	0
cg14396035	9	35096980	PIGO;PIGO	S_Shore	++++	++++	1	1.97727e-09	0	0	0
cg06328831	11	278912	NLRP6	N_Shore	++++	++++	1	1.97923e-09	0	0	0
cg27132535	8	20170388			++++	++++	0.120636	1.98055e-09	0	0	0
cg08164484	1	58713941	DAB1	N_Shore	++++	++++	1	1.9812e-09	0	0	0
cg24845175	10	124877238			++++	++++	0.0716145	1.99038e-09	0	0	0
cg05280750	19	5568193	PLAC2	S_Shore	++++	++++	1	2.00219e-09	0	0	0
cg26241993	19	51487245	KLK7;KLK7		++++	++++	1	2.01006e-09	0	0	0
cg15062470	2	27718710	FNDC4;GCKR	S_Shore	++++	++++	1	2.01498e-09	0	0	0
cg23447239	7	157697628	PTPRN2;PTPRN2;PTPRN2	S_Shelf	++++	++++	0.54465	2.0599e-09	0	0	0
cg16085374	2	236486327	AGAP1;AGAP1		++++	++++	1	2.07105e-09	0	0	0
cg18294257	22	30867673	SEC14L3		++++	++++	0.562685	2.07564e-09	0	0	0
cg11069748	10	118569479			++++	++++	0.852553	2.13958e-09	0	0	0
cg15869649	5	3198175			++++	++++	0.36004	2.14351e-09	0	0	0
cg07968906	17	40822942	PLEKHH3	Island	++++	++++	1	2.14384e-09	0	0	0
cg07019072	6	27215328	PRSS16	N_Shelf	++++	++++	1	2.1527e-09	0	0	0
cg12678433	2	237022804	AGAP1;AGAP1		++++	++++	1	2.15466e-09	0	0	0
cg05634630	12	99251017	ANKS1B;ANKS1B;ANKS1B		++++	++++	0.215958	2.18385e-09	0	0	0
cg21249366	9	129450136	LMX1B	N_Shelf	++++	++++	1	2.19106e-09	0	0	0
cg06490943	7	56184217	LOC389493	S_Shore	++++	++++	0.363319	2.21303e-09	0	0	0
cg01777300	14	104837070			++++	++++	0.0685977	2.26779e-09	0	0	0
cg10483261	7	1632661			++++	++++	1	2.27533e-09	0	0	0
cg14246940	9	129434406	LMX1B	S_Shore	++++	++++	0.726965	2.28976e-09	0	0	0
cg08961547	10	95327654	GPR120	S_Shore	++++	++++	1	2.32255e-09	0	0	0
cg05385610	19	40421700	FCGBP	Island	++++	++++	1	2.34452e-09	0	0	0
cg22027865	8	77147679			++++	++++	0.0984699	2.34583e-09	0	0	0
cg07684019	5	139174529	PSD2	N_Shore	++++	++++	1	2.36092e-09	0	0	0
cg01661130	16	51150297		S_Shelf	++++	++++	1	2.39043e-09	0	0	0
cg20300502	8	26048281		S_Shore	++++	++++	1	2.41928e-09	0	0	0
cg17009813	14	77041277			++++	++++	1	2.44617e-09	0	0	0
cg08069383	7	126897376		S_Shelf	++++	++++	0.310723	2.46158e-09	0	0	0
cg15848008	2	25584613			++++	++++	1	2.47044e-09	0	0	0
cg18007268	4	8074192	ABLIM2;ABLIM2;ABLIM2;ABLIM2;ABLIM2;ABLIM2;ABLIM2		++++	++++	0.33807	2.50618e-09	0	0	0
cg04491321	8	142736998		S_Shelf	++++	++++	1	2.52716e-09	0	0	0
cg01921918	2	170589904	KLHL23	N_Shore	++++	++++	1	2.52848e-09	0	0	0
cg25593625	1	24397689	MYOM3		++++	++++	0.126375	2.54225e-09	0	0	0
cg05986956	7	2720577	AMZ1	S_Shore	++++	++++	1	2.54815e-09	0	0	0
cg19490678	11	79651476			++++	++++	0.570227	2.54913e-09	0	0	0
cg09716807	5	574169			++++	++++	1	2.56291e-09	0	0	0
cg00867901	14	99787006			++++	++++	0.29859	2.5734e-09	0	0	0
cg13481359	2	73520043	EGR4	Island	++++	++++	1	2.58291e-09	0	0	0
cg18798289	5	72530245		S_Shore	++++	++++	0.252323	2.60029e-09	0	0	0
cg02770073	12	34548094			++++	++++	1	2.61603e-09	0	0	0
cg05902130	14	74885106	TMEM90A		++++	++++	1	2.61832e-09	0	0	0
cg20744756	1	95201495			++++	++++	0.222123	2.62226e-09	0	0	0
cg03613662	8	70404585	SULF1;SULF1;SULF1;SULF1		++++	++++	1	2.62586e-09	0	0	0
cg02692938	8	76032509			++++	++++	0.10352	2.63964e-09	0	0	0
cg03882437	9	140051729	GRIN1;GRIN1;GRIN1	Island	++++	++++	1	2.64783e-09	0	0	0
cg26274929	1	203965350			++++	++++	0.121423	2.65046e-09	0	0	0
cg25283121	12	132904540	GALNT9	N_Shore	++++	++++	0.144311	2.65439e-09	0	0	1
cg14402017	11	300490	IFITM5	S_Shore	++++	++++	1	2.65537e-09	0	0	0
cg18887096	2	219472410	PLCD4		++++	++++	0.0858127	2.658e-09	0	0	0
cg24414019	4	8640896		S_Shelf	++++	++++	0.303706	2.66521e-09	0	0	0
cg02045971	3	138739874	PRR23B	Island	++++	++++	0.0628594	2.68587e-09	0	0	1
cg01994014	6	168681627		N_Shore	++++	++++	1	2.70456e-09	0	0	0
cg16737409	20	57428366	GNAS;GNAS;GNAS;GNAS	Island	++++	++++	0.491202	2.75932e-09	0	0	0
cg16980245	15	25492469	SNORD115-42;SNORD115-10		++++	++++	1	2.76063e-09	0	0	0
cg11490681	17	77460916	HRNBP3	S_Shore	++++	++++	0.165822	2.76916e-09	0	0	0
cg07617246	15	65715951	IGDCC4	S_Shore	++++	++++	1	2.7767e-09	0	0	0
cg05883195	16	1072056		S_Shore	++++	++++	1	2.77834e-09	0	0	0
cg11667258	5	155107529		Island	++++	++++	0.0996831	2.78719e-09	0	0	0
cg20889395	17	48912556	WFIKKN2		++++	++++	0.51186	2.79572e-09	0	0	0
cg10118462	16	73697499			++++	++++	0.0575801	2.79965e-09	0	0	0
cg11246938	12	115112433	TBX3;TBX3	Island	++++	++++	0.226287	2.819e-09	0	0	0
cg12624197	1	20698023			++++	++++	0.64335	2.83277e-09	0	0	0
cg03441250	17	2649784		N_Shelf	++++	++++	1	2.83539e-09	0	0	0
cg27432085	1	11958572			++++	++++	0.167068	2.83638e-09	0	0	0
cg21163415	20	57876201	EDN3;EDN3;EDN3;EDN3	S_Shore	++++	++++	0.0505302	2.84851e-09	0	0	0
cg01874863	8	15093686	SGCZ	N_Shore	++++	++++	1	2.85671e-09	0	0	0
cg00032609	20	57606607	ATP5E;ATP5E	N_Shore	++++	++++	0.0523008	2.86261e-09	0	0	0
cg19910382	2	88427561	FABP1;FABP1		++++	++++	1	2.8731e-09	0	0	0
cg01289544	2	27887409	SUPT7L;SLC4A1AP	Island	++++	++++	1	2.89015e-09	0	0	0
cg22277296	5	54180170		Island	++++	++++	1	2.89376e-09	0	0	0
cg16819381	10	103070855		S_Shore	++++	++++	0.888623	2.89507e-09	0	0	0
cg17352045	6	32847702	PPP1R2P1	Island	++++	++++	0.211171	2.91114e-09	0	0	0
cg00057722	18	45934156		N_Shore	++++	++++	0.055875	2.91671e-09	0	0	1
cg04913246	14	99658630	BCL11B;BCL11B		++++	++++	0.0538748	2.92426e-09	0	0	0
cg05351599	9	129468003		N_Shore	++++	++++	1	2.92524e-09	0	0	0
cg01951459	2	236964187	AGAP1;AGAP1		++++	++++	0.695814	2.94459e-09	0	0	0
cg03268063	7	1337281		Island	++++	++++	1	2.97213e-09	0	0	0
cg01869058	6	31926196	RDBP;SKIV2L;MIR1236	N_Shore	++++	++++	0.182446	2.97311e-09	0	0	0
cg02273827	5	35938675	CAPSL;CAPSL;CAPSL		++++	++++	1	2.97639e-09	0	0	0
cg03080147	8	17270347	MTMR7	N_Shore	++++	++++	1	2.98033e-09	0	1	1
cg23058901	11	44324759	ALX4	N_Shore	++++	++++	1	3.00722e-09	0	0	0
cg05296818	14	61117162	SIX1	S_Shore	++++	++++	0.815828	3.01017e-09	0	0	0
cg02630677	8	3102222	CSMD1		++++	++++	0.146442	3.01902e-09	0	0	0
cg20597477	15	40211272	GPR176	N_Shore	++++	++++	0.334463	3.03115e-09	0	0	0
cg04565337	14	38071768		S_Shelf	++++	++++	1	3.03148e-09	0	1	1
cg00573338	22	38479099	SLC16A8;SLC16A8	S_Shore	++++	++++	1	3.03214e-09	0	0	1
cg25536014	5	5139458	ADAMTS16	Island	++++	++++	1	3.03542e-09	0	0	0
cg26077229	16	3017902	KREMEN2;PAQR4;KREMEN2	Island	++++	++++	1	3.04001e-09	0	0	0
cg03076037	17	79071361	BAIAP2;BAIAP2;BAIAP2;BAIAP2		++++	++++	0.086862	3.04689e-09	0	0	0
cg19080839	7	150939592	SMARCD3;SMARCD3;SMARCD3	N_Shelf	++++	++++	1	3.05116e-09	0	0	0
cg03731616	3	123603618	MYLK;MYLK;MYLK;MYLK	S_Shore	++++	++++	1	3.05214e-09	0	0	0
cg10583180	6	101851354	GRIK2;GRIK2;GRIK2	S_Shore	++++	++++	1	3.0846e-09	0	0	0
cg00913604	16	66958650	RRAD;RRAD	N_Shore	++++	++++	1	3.08493e-09	0	0	0
cg00850481	1	228891306		S_Shore	+++-	++++	1	3.08591e-09	0	0	0
cg13905238	3	197155273			++++	++++	1	3.10526e-09	0	0	0
cg02920216	21	19616939	CHODL	N_Shore	++++	++++	1	3.1128e-09	0	0	0
cg16582803	2	219763642		S_Shore	++++	++++	0.249864	3.11674e-09	0	0	0
cg22382805	13	110961594	COL4A2	S_Shore	++++	++++	0.0891574	3.13346e-09	0	0	0
cg01870916	8	37005619			++++	++++	0.147295	3.15182e-09	0	0	0
cg24955824	5	3394109			++++	++++	0.354137	3.15313e-09	0	0	0
cg05835346	16	54620105			++++	++++	1	3.16461e-09	0	0	0
cg07796335	4	59167549			++++	++++	0.451853	3.16658e-09	0	0	0
cg14064148	19	10527576		Island	++++	++++	1	3.16953e-09	0	0	1
cg10986946	11	12001622	DKK3;DKK3;DKK3		++++	++++	1	3.17051e-09	0	0	0
cg10536151	11	17758285	KCNC1;KCNC1	Island	++++	++++	0.254126	3.17707e-09	0	0	1
cg24006654	1	41131970	RIMS3	S_Shore	++++	++++	1	3.18297e-09	0	0	0
cg03963689	17	17739407	SREBF1;SREBF1	N_Shore	++++	++++	0.602689	3.21544e-09	0	0	0
cg24804179	12	49689685	PRPH	Island	++++	++++	1	3.21904e-09	0	0	0
cg08770961	16	66956122	RRAD;RRAD	Island	++++	++++	0.599738	3.22429e-09	0	0	0
cg14884373	20	3644023	GFRA4;GFRA4	S_Shore	++++	++++	1	3.23118e-09	0	0	0
cg11613005	5	145895523	GPR151		++++	++++	0.0706963	3.24331e-09	0	0	0
cg14337027	17	46803802	HOXB13	N_Shore	++++	++++	0.678435	3.24331e-09	0	0	0
cg07348641	13	25746495	FAM123A;FAM123A	S_Shore	++++	++++	1	3.24823e-09	0	0	0
cg10543035	1	179545790	NPHS2	S_Shore	++++	++++	0.376435	3.26331e-09	0	0	0
cg23799440	1	247096088	AHCTF1	S_Shore	++++	++++	0.768937	3.28233e-09	0	0	0
cg01056568	17	9729258	GLP2R		++++	++++	1	3.28233e-09	0	0	0
cg05620980	7	562844		Island	++++	++++	0.186217	3.28889e-09	0	0	1
cg21377071	15	84323963	ADAMTSL3	S_Shore	++++	++++	0.865013	3.29545e-09	0	0	0
cg00883218	1	6301400		N_Shore	++++	++++	0.645645	3.30528e-09	0	0	0
cg10555800	1	168356606			++++	++++	0.668598	3.36431e-09	0	1	1
cg01297370	2	228027989	COL4A3;COL4A4;COL4A3;COL4A3;COL4A3	N_Shore	++++	++++	1	3.3807e-09	0	0	0
cg01825295	3	147131617	ZIC1	S_Shore	++++	++++	0.25429	3.38398e-09	0	0	0
cg16245698	18	43355989		S_Shore	++++	++++	1	3.43644e-09	0	0	0
cg08007378	15	83477915	WHAMM	N_Shore	++++	++++	0.23314	3.45284e-09	0	0	0
cg01713701	17	48045654	DLX4	N_Shore	++++	++++	0.168445	3.45284e-09	0	0	0
cg09401099	3	156534380		Island	++++	++++	0.0531534	3.45284e-09	0	0	0
cg04621893	10	22624687		Island	++++	++++	1	3.45612e-09	0	0	0
cg20402783	12	54381013	HOXC10	S_Shore	++++	++++	1	3.47579e-09	0	0	0
cg05264279	7	158266136	PTPRN2;PTPRN2;PTPRN2		++++	++++	1	3.49219e-09	0	0	0
cg11700230	6	33159353	COL11A2;COL11A2;COL11A2;COL11A2	N_Shore	++++	++++	0.112767	3.50203e-09	0	0	0
cg20631768	20	24448859	TMEM90B	N_Shore	++++	++++	0.0922725	3.54793e-09	0	0	0
cg01811796	1	26233565	STMN1;STMN1;STMN1;STMN1	Island	++++	++++	0.0546618	3.55777e-09	0	0	0
cg10574376	16	78079753		Island	++++	++++	0.217008	3.59056e-09	0	0	0
cg22650315	2	118845443	INSIG2	N_Shore	++++	++++	0.0804679	3.62991e-09	0	0	0
cg20571420	22	25160308	TOP1P2;PIWIL3	S_Shore	++++	++++	0.333479	3.62991e-09	0	0	0
cg00337916	7	96643686	DLX6AS	N_Shelf	++++	++++	0.332824	3.70205e-09	0	0	0
cg01338043	7	100136013	AGFG2	N_Shore	++++	++++	1	3.73812e-09	0	0	0
cg23065097	2	24271827	FKBP1B;FKBP1B	N_Shore	++++	++++	0.0881081	3.75123e-09	0	0	0
cg10690887	18	19285051	ABHD3	Island	++++	++++	1	3.76763e-09	0	0	0
cg24474037	8	145865124			++++	++++	0.249208	3.79058e-09	0	0	0
cg13624833	5	159413877		N_Shore	++++	++++	1	3.82993e-09	0	0	0
cg05640342	11	18230961	LOC494141;LOC494141;LOC494141	S_Shore	++++	++++	0.0805335	3.8824e-09	0	0	0
cg22460466	7	1896154	MAD1L1;MAD1L1;MAD1L1	Island	++++	++++	0.169297	3.91846e-09	0	0	0
cg03292544	17	27335348		S_Shelf	++++	++++	0.17979	3.94142e-09	0	0	0
cg26669624	1	11761332	C1orf187		++++	++++	1	3.96109e-09	0	0	0
cg04410756	1	78956268	PTGFR;PTGFR	N_Shore	++++	++++	1	3.97093e-09	0	0	0
cg06112415	2	27342158	CGREF1;CGREF1;CGREF1	S_Shore	++++	++++	1	3.9906e-09	0	0	0
cg16555533	5	140243006	PCDHA6;PCDHA2;PCDHA1;PCDHA9;PCDHA7;PCDHA1;PCDHA6;PCDHA5;PCDHA10;PCDHA3;PCDHA4;PCDHA10;PCDHA8	Island	++++	++++	1	4.02339e-09	0	0	0
cg04646186	15	27215757	GABRG3	N_Shore	++++	++++	0.160411	4.03651e-09	0	0	0
cg06779961	1	29139758	OPRD1	S_Shore	++++	++++	1	4.03979e-09	0	0	0
cg11835209	5	4512534			++++	++++	1	4.05291e-09	0	0	0
cg15971953	7	1447698		Island	++++	++++	1	4.10209e-09	0	0	0
cg14193430	8	77806227			++++	++++	0.0643678	4.12177e-09	0	0	0
cg07908755	7	51385729	COBL	S_Shore	++++	++++	1	4.12504e-09	0	0	1
cg16726532	12	19692444			++++	++++	0.17274	4.148e-09	0	0	0
cg27080259	16	3087875		S_Shore	++++	++++	1	4.15456e-09	0	0	0
cg19964641	22	30901780	SEC14L4;SEC14L4	S_Shore	++++	++++	0.682698	4.17095e-09	0	0	0
cg11360230	7	1309189			++++	++++	0.675812	4.17751e-09	0	0	0
cg08158233	8	37351056			++++	++++	1	4.19063e-09	0	0	0
cg25034205	2	219924695	IHH	N_Shore	++++	++++	0.139688	4.24637e-09	0	0	0
cg16332577	17	37886349	C17orf37	N_Shore	++++	++++	0.0507925	4.25621e-09	0	0	0
cg05448404	4	779173	CPLX1	Island	++++	++++	1	4.25949e-09	0	0	0
cg13818276	22	32437865	SLC5A1	N_Shore	++++	++++	1	4.32835e-09	0	0	0
cg05477174	15	65648771	IGDCC3	S_Shore	++++	++++	0.638431	4.33818e-09	0	1	0
cg13468667	18	3411996	TGIF1		++++	++++	0.836158	4.39721e-09	0	0	0
cg22842797	17	48912621	WFIKKN2;WFIKKN2		++++	++++	0.0642366	4.42016e-09	0	0	1
cg15055965	11	70976779			++++	++++	1	4.42672e-09	0	0	0
cg27111925	2	45183274		S_Shore	++++	++++	0.595148	4.43328e-09	0	0	0
cg14241662	17	7199284	YBX2	N_Shore	++++	++++	1	4.49558e-09	0	0	0
cg20368301	12	113985700			++++	++++	1	4.50214e-09	0	0	0
cg06840837	12	110211393	MGC14436;MGC14436		++++	++++	0.91879	4.50214e-09	0	0	0
cg21554723	19	46438944		S_Shore	++++	++++	0.717456	4.50541e-09	0	0	0
cg13428516	19	49224033	MAMSTR;RASIP1	Island	++++	++++	1	4.54148e-09	0	0	0
cg12958778	4	6912474	TBC1D14;TBC1D14	S_Shore	++++	++++	1	4.58083e-09	0	0	0
cg20194689	5	178003633	COL23A1	Island	++++	++++	1	4.58739e-09	0	0	0
cg16313343	14	105768109	BRF1	S_Shore	+++-	++++	1	4.64313e-09	0	0	0
cg13717553	19	51067014	LRRC4B	N_Shelf	++++	++++	0.398732	4.66281e-09	0	0	0
cg24489344	22	46457998		Island	++++	++++	1	4.7579e-09	0	1	1
cg03085524	8	144852570		N_Shore	++++	++++	0.144901	4.76446e-09	0	0	0
cg00924685	1	17475656		N_Shore	++++	++++	1	4.79397e-09	0	0	0
cg13224213	7	150689881	NOS3;NOS3;NOS3;NOS3		++++	++++	1	4.82348e-09	0	0	0
cg03178816	6	170478083		S_Shelf	++++	++++	0.0889278	4.84316e-09	0	0	0
cg03720605	6	134052041			++++	++++	0.365942	4.85299e-09	0	0	0
cg09298273	19	51104955		N_Shelf	++++	++++	0.471855	4.85627e-09	0	0	0
cg25310617	19	58257751	ZNF776	N_Shore	+++-	++++	1	4.88251e-09	0	0	0
cg11945372	22	18507747	MICAL3;MICAL3;MICAL3	S_Shore	++++	++++	0.0867637	4.88578e-09	0	0	0
cg18091275	17	26120155	NOS2	N_Shore	++++	++++	0.248355	4.92185e-09	0	0	0
cg01900759	9	77501693	TRPM6	N_Shore	++++	++++	1	4.93825e-09	0	0	0
cg20611680	1	16554171		S_Shore	+++-	++++	1	4.94153e-09	0	0	0
cg14039306	4	4862240	MSX1	Island	++++	++++	0.104274	4.95137e-09	0	0	0
cg03152880	16	48019794			++++	++++	1	5.01695e-09	0	0	0
cg22443762	1	197890608	LHX9;LHX9	Island	++++	++++	0.0988306	5.0235e-09	0	0	0
cg25878057	7	154181568	DPP6;DPP6;DPP6		++++	++++	0.604985	5.0235e-09	0	0	0
cg26596350	16	27931936	GSG1L		++++	++++	1	5.06941e-09	0	0	0
cg24138433	11	69925268	ANO1	S_Shore	++++	++++	0.0639087	5.08253e-09	0	0	0
cg07845873	3	67022802			++++	++++	1	5.09564e-09	0	0	0
cg22247250	7	100845801	MOGAT3	S_Shore	++++	++++	0.113685	5.12843e-09	0	0	1
cg26207380	8	144222015			++++	++++	1	5.13499e-09	0	0	0
cg07983575	16	48993133			++++	++++	1	5.14483e-09	0	0	0
cg17859706	1	16735717	SPATA21		++++	++++	1	5.20057e-09	0	0	0
cg09932758	12	58022542	B4GALNT1	S_Shore	++++	++++	1	5.22681e-09	0	0	0
cg03386751	17	37843793	ERBB2;PGAP3	N_Shore	++++	++++	1	5.23008e-09	0	0	0
cg06608359	6	28831300		N_Shore	++++	++++	0.0616789	5.25632e-09	0	0	0
cg00059399	5	2008272		Island	++++	++++	1	5.26288e-09	0	0	1
cg09000779	3	136867925			++++	++++	0.0643678	5.27271e-09	0	0	0
cg12442902	4	7427446	SORCS2		++++	++++	0.334463	5.27927e-09	0	0	0
cg26701390	2	19551944	OSR1	Island	++++	++++	1	5.36453e-09	0	0	0
cg26233753	1	201316444			++++	++++	1	5.51536e-09	0	0	0
cg24174608	15	38856094	RASGRP1;RASGRP1	N_Shore	++++	++++	1	5.54487e-09	0	0	0
cg11078084	4	4864902	MSX1	N_Shore	++++	++++	0.132572	5.58422e-09	0	0	0
cg13556639	2	97173735	NEURL3	N_Shore	++++	++++	1	5.58422e-09	0	0	0
cg02481789	17	40805506		N_Shore	++++	++++	1	5.59078e-09	0	1	1
cg15155441	11	57005981	APLNR;APLNR		++++	++++	1	5.60062e-09	0	0	0
cg17766026	10	102405781			++++	++++	0.284064	5.70883e-09	0	0	0
cg12443853	12	111369279			++++	++++	1	5.72522e-09	0	0	0
cg26754510	6	71276074	C6orf57	N_Shore	++++	++++	0.0561045	5.73178e-09	0	0	0
cg06576732	20	20344672		Island	++++	++++	1	5.8072e-09	0	0	0
cg15833797	9	139091875	LHX3;LHX3	Island	++++	++++	1	5.83343e-09	0	0	0
cg21973370	17	1957919	HIC1	Island	++++	++++	0.0747295	5.83343e-09	0	0	0
cg02192673	4	72897565	NPFFR2;NPFFR2	Island	++++	++++	0.986666	5.87606e-09	0	0	0
cg12361744	3	131515563	CPNE4		++++	++++	0.232813	5.89245e-09	0	0	0
cg13709618	1	35350879	DLGAP3	Island	++++	++++	0.618757	5.9318e-09	0	0	0
cg02634414	10	91294781	SLC16A12	N_Shore	++++	++++	1	5.93508e-09	0	0	1
cg10245273	13	112725605	SOX1;SOX1	N_Shore	++++	++++	1	5.95148e-09	0	0	0
cg24613558	17	65471347	PITPNC1;PITPNC1		++++	++++	1	5.96459e-09	0	0	0
cg17181362	20	57090749	APCDD1L	S_Shore	++++	++++	0.630233	5.98755e-09	0	0	0
cg00229754	15	25018302		Island	++++	++++	0.662368	6.10559e-09	0	0	0
cg14612417	2	95688557		N_Shelf	++++	++++	1	6.11871e-09	0	0	0
cg16417043	8	42619185	CHRNA6		++++	++++	1	6.14822e-09	0	0	0
cg04986504	11	12031266	DKK3;DKK3;DKK3	S_Shore	++++	++++	1	6.15806e-09	0	0	0
cg07244927	16	62067937	CDH8	N_Shore	++++	++++	1	6.16461e-09	0	0	1
cg04913291	11	133187956	OPCML		++++	++++	0.43513	6.22036e-09	0	0	0
cg19730248	1	197873880	C1orf53	S_Shore	++++	++++	0.0583015	6.28594e-09	0	0	0
cg13931292	1	114698448		S_Shore	++++	++++	0.0828616	6.2925e-09	0	0	0
cg04058337	16	1113669		N_Shelf	++++	++++	1	6.30889e-09	0	0	0
cg01048561	3	50711663	DOCK3	N_Shore	++++	++++	0.051809	6.37447e-09	0	1	0
cg17842879	17	80328714		N_Shore	++++	++++	0.324069	6.38759e-09	0	0	0
cg05247391	8	71581649	XKR9;LACTB2;XKR9	Island	++++	++++	1	6.38759e-09	0	0	0
cg03031613	18	55018587	ST8SIA3	N_Shore	++++	++++	0.0854848	6.44005e-09	0	0	0
cg00830029	12	2943902	NRIP2		++++	++++	1	6.44661e-09	0	0	0
cg21744360	12	107297296			++++	++++	1	6.44661e-09	0	0	0
cg21719704	19	55948588	SHISA7	N_Shelf	++++	++++	0.108832	6.5417e-09	0	0	0
cg00714115	19	52954462		Island	++++	++++	1	6.5417e-09	0	0	0
cg17564844	22	23413784	RTDR1;GNAZ	S_Shore	++++	++++	1	6.5581e-09	0	0	0
cg25592910	10	56561124	PCDH15;PCDH15;PCDH15;PCDH15;PCDH15;PCDH15;PCDH15;PCDH15;PCDH15;PCDH15;PCDH15;PCDH15		++++	++++	0.294688	6.6368e-09	0	0	0
cg01539483	4	147164948			++++	++++	1	6.64336e-09	0	0	0
cg08913010	11	7272653	SYT9	N_Shore	++++	++++	1	6.71549e-09	0	0	0
cg03786842	10	127569751	DHX32;DHX32		++++	++++	1	6.72533e-09	0	0	0
cg15020894	6	160779885	SLC22A3	N_Shelf	++++	++++	1	6.72533e-09	0	0	0
cg03551401	8	132051228	ADCY8	N_Shore	++++	++++	1	6.73845e-09	0	0	0
cg26009801	19	18338153	PDE4C;PDE4C	S_Shore	++++	++++	1	6.77452e-09	0	0	0
cg11275487	5	37836119	GDNF;GDNF;GDNF	N_Shore	++++	++++	0.0510876	6.79091e-09	0	0	0
cg13056510	4	100571808		N_Shore	++++	++++	0.250683	6.91552e-09	0	0	0
cg06795649	15	30135976			++++	++++	1	6.92535e-09	0	0	0
cg00039176	5	140753076	PCDHGA4;PCDHGA6;PCDHGA1;PCDHGA5;PCDHGB1;PCDHGA6;PCDHGA3;PCDHGA2;PCDHGB2;PCDHGB3	N_Shore	++++	++++	0.2557	6.93519e-09	0	0	0
cg22996440	2	31361818	GALNT14	Island	++++	++++	1	6.95814e-09	0	0	0
cg07704699	11	27742832	BDNF;BDNF;BDNF;BDNF	N_Shore	++++	++++	0.0581048	6.96142e-09	0	0	0
cg04919596	1	996054		S_Shore	++++	++++	1	6.9811e-09	0	0	0
cg14016366	5	156277454	PPP1R2P3	Island	++++	++++	1	7.00405e-09	0	0	0
cg25856663	15	83317632	CPEB1	S_Shore	++++	++++	1	7.05652e-09	0	0	0
cg10630457	13	108374258	FAM155A		++++	++++	1	7.11882e-09	0	0	0
cg03754044	6	10112908			++++	++++	1	7.168e-09	0	0	0
cg25246031	19	46732864	IGFL1		++++	++++	0.213007	7.17784e-09	0	0	0
cg03904291	11	119019361	ABCG4;ABCG4	N_Shore	++++	++++	1	7.19751e-09	0	1	0
cg00961616	16	86794685			++++	++++	1	7.21391e-09	0	0	0
cg20976526	8	101118021	RGS22	Island	++++	++++	1	7.26637e-09	0	0	0
cg26880735	18	44784846		N_Shelf	++++	++++	0.119882	7.31556e-09	0	0	0
cg01065960	17	27181503	ERAL1	N_Shore	++++	++++	0.247175	7.35163e-09	0	0	0
cg17897626	19	57155294		S_Shore	++++	++++	0.143885	7.35491e-09	0	0	0
cg14506260	10	25797307	GPR158		++++	++++	0.08014	7.39426e-09	0	0	0
cg16911810	2	119596346		N_Shelf	++++	++++	0.149164	7.41721e-09	0	0	0
cg20515580	11	66800566	SYT12		++++	++++	0.321052	7.53198e-09	0	0	0
cg08802933	2	219282528	VIL1		++++	++++	1	7.54837e-09	0	0	0
cg03017091	1	41119283	RIMS3	N_Shore	++++	++++	1	7.60084e-09	0	0	0
cg07012898	7	1347406			++++	++++	1	7.67626e-09	0	0	0
cg01126821	11	1650595	HCCA2;KRTAP5-5		++++	++++	0.114308	7.71888e-09	0	0	0
cg14076971	1	2137665	C1orf86	S_Shore	++++	++++	1	7.77463e-09	0	0	0
cg12041830	1	5907402			++++	++++	0.150279	7.81726e-09	0	0	0
cg26569295	2	238536869	LRRFIP1	S_Shore	++++	++++	0.77156	7.84677e-09	0	0	0
cg19990022	5	140430619	PCDHB1		++++	++++	1	7.89267e-09	0	0	0
cg18758664	15	90320475	MESP2	Island	++++	++++	0.142475	7.90907e-09	0	0	1
cg07179068	5	176060165	EIF4E1B	S_Shelf	++++	++++	1	7.96153e-09	0	0	0
cg21878759	18	44099053	LOXHD1;LOXHD1;LOXHD1		++++	++++	1	8.01728e-09	0	0	0
cg20988073	3	125900093	ALDH1L1	S_Shore	++++	++++	1	8.14516e-09	0	0	0
cg08675565	4	189321244			++++	++++	0.627938	8.17467e-09	0	0	0
cg06073351	10	22625665		Island	++++	++++	1	8.17795e-09	0	0	0
cg00500989	1	156253073	SMG5;TMEM79;TMEM79		++++	++++	0.405291	8.2173e-09	0	0	0
cg05566582	7	157257942		N_Shelf	++++	++++	1	8.22386e-09	0	0	0
cg23058124	3	133392794		N_Shore	++++	++++	1	8.2796e-09	0	0	0
cg05553829	8	57307649	SDR16C6		++++	++++	1	8.34846e-09	0	0	0
cg07300349	16	53576284			++++	++++	0.0805335	8.38453e-09	0	0	0
cg25953417	6	30690712	TUBB	S_Shore	++++	++++	0.235764	8.39109e-09	0	0	0
cg00175823	12	132977140		S_Shore	++++	++++	1	8.4206e-09	0	0	0
cg07080231	15	101300217			++++	++++	0.498744	8.42716e-09	0	0	0
cg08044427	2	20442131			++++	++++	0.553504	8.48618e-09	0	0	0
cg01729262	1	933306		N_Shore	++++	++++	0.154247	8.4993e-09	0	0	0
cg02085016	16	86376985	LOC732275		++++	++++	1	8.4993e-09	0	0	0
cg02364831	16	52417584			++++	++++	1	8.58783e-09	0	0	0
cg26955996	19	48547989	CABP5		++++	++++	0.459395	8.59439e-09	0	0	0
cg12851514	20	18775065	HSPC072;LOC100270804;HSPC072		++++	++++	0.554159	8.65669e-09	0	0	1
cg14871138	20	61340885	NTSR1	Island	++++	++++	1	8.66653e-09	0	0	1
cg03709307	17	37760652	NEUROD2	N_Shore	++++	++++	0.927971	8.7026e-09	0	0	0
cg08830641	10	129976634			++++	++++	0.546946	8.7026e-09	0	0	0
cg00871560	3	132756721	TMEM108;TMEM108	N_Shore	++++	++++	0.0844355	8.71244e-09	0	1	0
cg00025823	17	43909151	CRHR1;CRHR1;CRHR1;CRHR1		++++	++++	0.100339	8.79769e-09	0	0	0
cg15329876	17	39728628	KRT9		++++	++++	1	9.00099e-09	0	0	0
cg12513379	19	15838397	OR10H2	N_Shore	++++	++++	0.122112	9.0305e-09	0	0	0
cg06353655	10	132954294	TCERG1L		++++	++++	0.0930594	9.05346e-09	0	0	0
cg24519413	1	26490540		Island	++++	++++	1	9.14527e-09	0	0	1
cg07380590	16	88343806			++++	++++	1	9.20101e-09	0	0	0
cg12802086	1	29557820	MECR;MECR	S_Shore	++++	++++	0.0674173	9.24036e-09	0	0	0
cg00426720	2	157187204	NR4A2	N_Shore	++++	++++	0.488251	9.24364e-09	0	0	0
cg09919392	16	34809677		Island	++++	++++	0.241404	9.36497e-09	0	0	0
cg16817179	22	19726430		S_Shore	++++	++++	0.383977	9.38792e-09	0	0	0
cg26588045	19	41283090	MIA;RAB4B	N_Shore	++++	++++	0.130637	9.40432e-09	0	0	0
cg01965673	3	126700750		N_Shore	++++	++++	0.21104	9.46006e-09	0	0	0
cg03602297	2	30142128	ALK	N_Shore	++++	++++	1	9.48629e-09	0	0	0
cg00774375	19	7989720	CTXN1	Island	++++	++++	0.523992	9.53876e-09	0	0	0
cg22219913	6	138328154			++++	++++	1	9.54859e-09	0	0	0
cg01565314	19	45737610	EXOC3L2	Island	++++	++++	1	9.6109e-09	0	0	0
cg01989224	15	23932758	NDN	S_Shore	++++	++++	0.0951908	9.70271e-09	0	0	0
cg23445461	5	140864733	PCDHGA4;PCDHGC3;PCDHGA12;PCDHGA11;PCDHGA11;PCDHGA9;PCDHGA1;PCDHGB1;PCDHGC4;PCDHGB6;PCDHGB3;PCDHGC4;PCDHGB7;PCDHGA6;PCDHGA8;PCDHGA10;PCDHGA5;PCDHGB4;PCDHGA3;PCDHGA2;PCDHGA7;PCDHGB2;PCDHGB5;PCDHGC3	Island	++++	++++	1	9.72894e-09	0	0	0
cg05371332	4	8690489		S_Shore	++++	++++	1	9.75517e-09	0	0	0
cg24119225	5	140344483	PCDHA7;PCDHAC2;PCDHA12;PCDHA6;PCDHA10;PCDHA4;PCDHA11;PCDHA8;PCDHA6;PCDHA1;PCDHA2;PCDHA1;PCDHA9;PCDHA13;PCDHA5;PCDHAC1;PCDHA3;PCDHA10	N_Shore	++++	++++	1	9.75845e-09	0	0	0
cg12869949	5	3116683			++++	++++	0.096568	9.78469e-09	1	0	0
cg01386425	12	118407487	KSR2	S_Shore	++++	++++	1	9.7978e-09	0	0	0
cg02693157	15	87892167			++++	++++	1	9.96503e-09	0	0	0
cg21177821	14	61121712		N_Shore	++++	++++	1	9.96831e-09	0	0	0
cg17304646	3	125932534		Island	++++	++++	0.940104	1.00077e-08	0	0	0
cg03862854	20	22556600	C20orf56	N_Shore	++++	++++	1	1.00273e-08	0	0	0
cg03589385	16	34812259		S_Shelf	++++	++++	1	1.00864e-08	0	0	0
cg06365843	11	41330346			++++	++++	0.138114	1.01093e-08	0	0	0
cg21367187	20	42744457	JPH2	Island	++++	++++	1	1.01159e-08	0	0	0
cg12043952	1	39254897			++++	++++	0.429556	1.01323e-08	0	0	0
cg04264925	5	134875554		N_Shelf	++++	++++	1	1.01388e-08	0	1	0
cg26997327	6	75911716	COL12A1;COL12A1	Island	++++	++++	1	1.01683e-08	0	0	0
cg09194449	7	157482914	PTPRN2;PTPRN2;PTPRN2	Island	++++	++++	0.624987	1.03684e-08	0	0	0
cg20845050	8	146053666	ZNF7	S_Shore	++++	++++	0.120505	1.03782e-08	0	0	0
cg02008818	3	170625519	EIF5A2	N_Shore	++++	++++	0.113062	1.03979e-08	0	0	0
cg13071569	12	107296946			++++	++++	0.656794	1.047e-08	0	0	0
cg08265769	8	50824622	SNTG1;SNTG1	S_Shore	++++	++++	0.0988961	1.05421e-08	0	0	0
cg12422351	1	95201226			++++	++++	0.981092	1.06995e-08	0	0	0
cg23562473	19	51334972	KLK15;KLK15;KLK15		++++	++++	0.967648	1.08373e-08	0	0	0
cg18040225	10	97802849	CCNJ;CCNJ;CCNJ	N_Shore	++++	++++	0.120538	1.08766e-08	0	0	0
cg05902711	16	89114919		S_Shore	++++	++++	0.0875506	1.08799e-08	0	0	0
cg08496775	8	80523226	STMN2	N_Shore	++++	++++	1	1.08864e-08	0	0	0
cg01663825	7	43238739	HECW1		++++	++++	0.112176	1.09422e-08	0	0	0
cg06032090	20	17209845	PCSK2	S_Shore	++++	++++	1	1.09619e-08	0	0	0
cg27413508	20	30225517	COX4I2	N_Shore	++++	++++	0.955187	1.09684e-08	0	0	0
cg27451524	7	54257071			++++	++++	0.0654826	1.09717e-08	0	0	0
cg23681730	11	35683551	TRIM44	N_Shore	++++	++++	0.176085	1.10274e-08	0	0	0
cg09002919	12	50339186			++-+	++++	1	1.1034e-08	0	0	0
cg08413157	20	41818756	PTPRT;PTPRT	Island	++++	++++	0.249405	1.10537e-08	0	0	0
cg21042248	19	59092612	MGC2752	N_Shore	++++	++++	0.360696	1.1057e-08	0	0	0
cg17238766	1	60539675	C1orf87	S_Shore	++++	++++	0.226484	1.1093e-08	0	0	0
cg24795046	17	42393317	RUNDC3A;RUNDC3A;RUNDC3A	S_Shore	++++	++++	1	1.11225e-08	0	0	0
cg00449767	19	45737603	EXOC3L2	Island	++++	++++	1	1.1152e-08	0	0	0
cg13872238	9	136430793	ADAMTSL2;ADAMTSL2	N_Shelf	++++	++++	1	1.13258e-08	0	0	0
cg15049636	17	31605952	ACCN1;ACCN1		++++	++++	0.539732	1.13455e-08	0	0	0
cg13201461	1	109288968	STXBP3	N_Shore	++++	++++	1	1.13521e-08	0	0	0
cg02428178	15	49104237	CEP152	S_Shore	++++	++++	1	1.13619e-08	0	0	0
cg02778609	16	23568302	UBFD1;EARS2;EARS2	N_Shore	++++	++++	1	1.14865e-08	0	0	0
cg12583087	13	103054118	FGF14;FGF14	S_Shore	++++	++++	1	1.15127e-08	0	0	0
cg02688422	5	1409937	SLC6A3		++++	++++	1	1.15259e-08	0	0	0
cg22398879	8	49173419		Island	++++	++++	1	1.1575e-08	0	0	0
cg09738410	11	2442304	TRPM5	Island	++++	++++	1	1.17292e-08	0	0	0
cg07197059	14	23836012	EFS;EFS	S_Shore	++++	++++	1	1.17587e-08	0	0	0
cg26787256	2	71695338	DYSF;DYSF;DYSF;DYSF;DYSF;DYSF;DYSF;DYSF;DYSF;DYSF;DYSF;DYSF;DYSF;DYSF	S_Shore	++++	++++	1	1.1762e-08	0	0	0
cg06911613	16	85846184		S_Shore	++++	++++	1	1.18505e-08	0	0	0
cg11598935	20	55837619	BMP7	N_Shore	++++	++++	1	1.19193e-08	0	0	1
cg24742746	13	100638446	ZIC2	S_Shore	++++	++++	1	1.19849e-08	0	0	0
cg13394191	8	127822176			++++	++++	0.117882	1.20177e-08	0	0	0
cg20327163	15	96877194	NR2F2;NR2F2;NR2F2;NR2F2	Island	++++	++++	1	1.20407e-08	0	0	0
cg08554860	4	7512177	SORCS2	Island	++++	++++	1	1.20571e-08	0	0	0
cg21659949	22	22020025	PPIL2;PPIL2;PPIL2	N_Shore	++++	++++	0.457427	1.20702e-08	0	0	0
cg13326175	11	45718234			++++	++++	0.438737	1.21226e-08	0	0	0
cg07115626	14	38071285		S_Shelf	++++	++++	0.121653	1.21226e-08	0	0	0
cg27088197	5	151292089	GLRA1;GLRA1		++++	++++	0.0838125	1.21587e-08	0	0	0
cg17852224	22	51042761	MAPK8IP2;MAPK8IP2	Island	++++	++++	1	1.22276e-08	0	0	0
cg20806345	2	182543706	NEUROD1		++++	++++	0.205039	1.22309e-08	0	0	0
cg19399220	19	10527588		Island	++++	++++	1	1.23358e-08	0	0	1
cg01965874	1	19052204	PAX7;PAX7;PAX7		++++	++++	1	1.23423e-08	0	0	0
cg00793719	14	95477946			++++	++++	0.374468	1.23456e-08	0	0	0
cg24811352	5	140529499	PCDHB6	N_Shore	++++	++++	1	1.23817e-08	0	0	0
cg20237773	17	18044452	MYO15A		++++	++++	1	1.24178e-08	0	0	0
cg06520296	8	37350981			++++	++++	1	1.25129e-08	0	0	0
cg02329205	15	100274128	LYSMD4	S_Shore	++++	++++	1	1.25358e-08	0	0	0
cg05594286	16	86840467			++++	++++	0.317314	1.26998e-08	0	0	0
cg04415780	1	156819191	NTRK1;INSRR	Island	++++	++++	1	1.2726e-08	0	0	1
cg21797520	3	140769274	SPSB4	N_Shore	++++	++++	1	1.27588e-08	0	0	0
cg23873703	3	155838625	KCNAB1		++++	++++	1	1.27981e-08	0	0	0
cg19590445	5	174155345	MSX2	N_Shelf	++++	++++	1	1.2844e-08	0	0	0
cg24004943	10	127569905	DHX32		++++	++++	1	1.28572e-08	0	0	0
cg00459997	12	130621721		N_Shore	++++	++++	0.486939	1.29195e-08	0	0	0
cg04585787	2	241235366			++++	++++	1	1.29359e-08	0	0	0
cg07053697	12	111374835			++++	++++	0.36627	1.29752e-08	0	0	0
cg11071682	1	210411064	SERTAD4	S_Shelf	++++	++++	1	1.30506e-08	0	0	0
cg13424878	11	15057083			++++	++++	0.193005	1.30998e-08	0	0	0
cg01470356	4	41746614	PHOX2B	N_Shore	++++	++++	0.124473	1.31031e-08	0	0	0
cg01060444	10	88100354	GRID1		++++	++++	1	1.31195e-08	0	0	0
cg04510398	7	1471603		N_Shelf	++++	++++	1	1.31818e-08	0	0	0
cg21342567	13	36484087	MIR548F5;DCLK1		++++	++++	1	1.31851e-08	0	0	0
cg06706875	19	495355	MADCAM1;MADCAM1	N_Shore	++++	++++	1	1.31851e-08	0	0	0
cg19158754	11	69794856			++++	++++	0.0820746	1.32179e-08	0	1	0
cg04921824	8	27449716		N_Shore	++++	++++	0.213368	1.32539e-08	0	0	0
cg10854767	7	157495969	PTPRN2;PTPRN2;PTPRN2	S_Shore	++++	++++	1	1.32802e-08	0	0	0
cg18954504	17	34819740		N_Shore	++++	++++	1	1.33818e-08	0	0	0
cg18947175	17	77093804	HRNBP3	Island	++++	++++	0.093748	1.349e-08	0	0	0
cg03236328	15	75101344			++++	++++	1	1.3572e-08	0	0	0
cg00221650	2	6819650			++++	++++	0.0522681	1.35818e-08	0	0	0
cg19296509	4	7046066	CCDC96;TADA2B	S_Shore	++++	++++	0.0909608	1.36113e-08	0	0	0
cg16911275	1	37289860	GRIK3		++++	++++	1	1.36736e-08	0	0	0
cg12398330	11	124734412	ROBO3	N_Shore	++++	++++	0.76697	1.37359e-08	0	0	0
cg13425335	12	132920348		N_Shore	++++	++++	1	1.37556e-08	0	0	0
cg00233565	5	176160659			++++	++++	0.992241	1.37851e-08	0	0	0
cg15345477	10	130279644			++++	++++	0.288097	1.38343e-08	0	0	0
cg10239022	12	131533104	GPR133	S_Shelf	++++	++++	1	1.40638e-08	0	0	0
cg02852557	15	25907264			++++	++++	1	1.40934e-08	0	0	0
cg22898745	13	112861518			++++	++++	1	1.41294e-08	0	0	0
cg09765711	19	51141269	SYT3;SYT3;SYT3;SYT3	N_Shore	++++	++++	1	1.41655e-08	0	0	0
cg20154287	19	1267350		Island	++++	++++	1	1.42212e-08	0	0	0
cg02780787	17	80328607		N_Shore	++++	++++	1	1.42212e-08	0	0	0
cg01130898	2	219473002	PLCD4		++++	++++	1	1.42409e-08	0	0	0
cg25210871	22	40072187	CACNA1I;CACNA1I	N_Shelf	++++	++++	1	1.42803e-08	0	0	0
cg24765924	5	6583001	LOC255167;LOC255167	Island	++++	++++	0.431523	1.42835e-08	0	0	0
cg16786481	16	23724835	ERN2	S_Shore	++++	++++	0.137261	1.43098e-08	0	0	0
cg01705934	7	155258915		Island	++++	++++	0.0827632	1.43721e-08	0	0	0
cg14396117	13	109248047	MYO16		++++	++++	1	1.43754e-08	0	0	0
cg21314318	15	100651510	ADAMTS17		++++	++++	0.249831	1.44934e-08	0	0	0
cg00510111	2	197458521	HECW2	Island	++++	++++	0.21363	1.44967e-08	0	0	0
cg12471051	1	17848742			++++	++++	0.967648	1.45164e-08	0	0	0
cg13836550	10	118084504	C10orf96		++++	++++	0.0905018	1.45623e-08	0	0	0
cg04337358	14	98489522			++++	++++	1	1.46049e-08	0	0	0
cg00339913	8	22085227	PHYHIP;PHYHIP		++++	++++	0.267079	1.48967e-08	0	0	0
cg05678033	12	115104591		N_Shore	++++	++++	0.0658433	1.4923e-08	0	0	0
cg00423443	16	82660376	CDH13	N_Shore	++++	++++	1	1.49754e-08	0	0	0
cg26234223	20	18487771	SEC23B;SEC23B;SEC23B	N_Shore	++++	++++	0.224484	1.50869e-08	0	0	0
cg25054390	14	91720372	GPR68	S_Shore	++++	++++	0.195628	1.50935e-08	0	0	0
cg05768403	6	13811256	CCDC90A	N_Shelf	++++	++++	0.0780086	1.51099e-08	0	0	0
cg05214235	11	12737685	TEAD1		++++	++++	1	1.5205e-08	0	0	0
cg03298073	1	209404846		Island	++++	++++	1	1.52345e-08	0	0	0
cg25619638	2	220310232	SPEG	S_Shore	++++	++++	1	1.52705e-08	0	0	0
cg27525524	1	16468313	EPHA2	S_Shelf	++++	++++	0.0743689	1.53427e-08	0	0	0
cg27268574	19	17858101	FCHO1;FCHO1	N_Shore	++++	++++	1	1.53492e-08	0	0	0
cg27547132	16	5560894			++++	++++	0.201235	1.53755e-08	0	0	0
cg08415998	10	50602664		N_Shore	++++	++++	0.18848	1.55296e-08	0	0	0
cg01202519	11	85645743		Island	++++	++++	1	1.55657e-08	0	0	0
cg01266390	10	125034002			++++	++++	1	1.55755e-08	0	0	0
cg08175928	9	134165024	PPAPDC3		++++	++++	1	1.56148e-08	0	0	0
cg19083626	7	55322087		N_Shore	++++	++++	0.155886	1.56411e-08	0	0	0
cg05695762	4	2059595		N_Shore	++++	++++	1	1.56411e-08	0	0	0
cg25303540	11	119206052	RNF26	S_Shore	++++	++++	1	1.57394e-08	0	0	0
cg19569074	7	4347499		N_Shore	++++	++++	1	1.5769e-08	0	0	0
cg09469610	15	68113110		N_Shore	++++	++++	1	1.58739e-08	0	0	0
cg24640101	15	25482669	SNORD115-37		++++	++++	1	1.59362e-08	0	0	0
cg01142721	10	85985448	LRIT2		++++	++++	0.456772	1.59362e-08	0	0	0
cg11784990	12	103218665		Island	++++	++++	0.847962	1.5946e-08	0	0	0
cg02270420	16	88453939		Island	++++	++++	1	1.59526e-08	0	0	0
cg25962358	5	140347293	PCDHAC2;PCDHA7;PCDHA12;PCDHA6;PCDHA10;PCDHA4;PCDHA11;PCDHA8;PCDHA6;PCDHA1;PCDHA2;PCDHA1;PCDHA9;PCDHA13;PCDHA5;PCDHAC1;PCDHA3;PCDHAC2;PCDHA10	S_Shore	++++	++++	1	1.6005e-08	0	0	0
cg22351510	19	11784246	ZNF833	N_Shore	++++	++++	1	1.60313e-08	0	0	0
cg00073549	16	87609078			++++	++++	1	1.60411e-08	0	0	0
cg05654780	1	156625372	BCAN	N_Shore	++++	++++	0.0548585	1.61788e-08	0	0	0
cg27385272	17	27507678	MYO18A;MYO18A	S_Shore	++++	++++	1	1.62083e-08	0	0	0
cg04064631	7	66856380			++++	++++	1	1.63198e-08	0	0	0
cg16422714	5	3059137			++++	++++	0.0690568	1.6369e-08	0	0	0
cg08298827	11	62009585	SCGB1D2		++++	++++	1	1.64608e-08	0	0	0
cg01699028	15	25322897	SNORD116-13		++-+	++++	1	1.65133e-08	0	0	0
cg16491668	12	115150060			++++	++++	1	1.65461e-08	0	0	0
cg02022733	5	140864578	PCDHGA4;PCDHGC3;PCDHGA12;PCDHGA11;PCDHGA11;PCDHGA9;PCDHGA1;PCDHGB1;PCDHGC4;PCDHGB6;PCDHGB3;PCDHGC4;PCDHGB7;PCDHGA6;PCDHGA8;PCDHGA10;PCDHGA5;PCDHGB4;PCDHGA3;PCDHGA2;PCDHGA7;PCDHGB2;PCDHGB5;PCDHGC3	Island	+++-	++++	1	1.65756e-08	0	0	0
cg13857119	1	6580308	PLEKHG5		++++	++++	0.719751	1.66674e-08	0	0	0
cg20209891	22	43806614	MPPED1	N_Shore	++++	++++	1	1.68478e-08	0	0	0
cg01215511	16	2975552	FLYWCH1;FLYWCH1		++++	++++	0.241338	1.68576e-08	0	0	0
cg21514871	16	3307814	MEFV	S_Shelf	++++	++++	0.0550225	1.68707e-08	0	0	0
cg18431123	20	44144582	SPINT3		++++	++++	0.677124	1.69297e-08	0	0	0
cg20504791	20	22562478	FOXA2;FOXA2	N_Shore	++++	++++	0.285736	1.69724e-08	0	0	0
cg05853285	11	44339621		N_Shore	++++	++++	1	1.73298e-08	0	0	0
cg03275375	8	28439379			++++	++++	0.703684	1.73626e-08	0	0	0
cg20908789	8	11551964		S_Shore	++++	++++	1	1.74085e-08	0	0	0
cg20335213	1	94704048	ARHGAP29	S_Shore	++++	++++	1	1.74282e-08	0	0	0
cg06506007	13	36699873	DCLK1		++++	++++	1	1.74708e-08	0	0	0
cg05650674	16	68677997	CDH3	N_Shore	++++	++++	1	1.74872e-08	0	1	0
cg20322862	18	3412088	TGIF1;TGIF1		++++	++++	0.0635152	1.75167e-08	0	0	0
cg01595325	16	25706401	HS3ST4	S_Shore	++++	++++	1	1.76151e-08	0	0	0
cg03015952	19	55987366	ZNF628	N_Shore	++++	++++	1	1.76347e-08	0	0	0
cg20099005	22	41956854	CSDC2		++++	++++	0.311674	1.76413e-08	0	0	0
cg05083128	4	10077759	WDR1;WDR1	N_Shore	++++	++++	0.16851	1.76478e-08	0	0	0
cg21488132	11	57508545	C11orf31	N_Shore	++++	++++	0.229993	1.77101e-08	0	0	0
cg06626102	5	1346156	CLPTM1L	S_Shore	++++	++++	0.105553	1.77593e-08	0	0	0
cg02051924	16	11681482	LITAF;LITAF;LITAF;LITAF	S_Shore	++++	++++	0.503662	1.78315e-08	0	0	0
cg19736098	12	132689029	GALNT9;GALNT9	N_Shore	++++	++++	0.0690896	1.79594e-08	0	0	0
cg06370528	18	34972877	BRUNOL4;BRUNOL4;BRUNOL4;BRUNOL4	N_Shore	++++	++++	1	1.79921e-08	0	0	0
cg03458048	4	8546787			++++	++++	0.309837	1.80217e-08	0	0	0
cg03340365	10	407847	DIP2C	N_Shore	+++-	++++	1	1.80381e-08	0	0	0
cg16606974	16	71098674	HYDIN;HYDIN		++++	++++	1	1.80938e-08	0	0	0
cg10355759	11	1412345	BRSK2	Island	++++	++++	1	1.81823e-08	0	0	0
cg17973773	8	27695870	PBK	S_Shore	++++	++++	1	1.8202e-08	0	0	1
cg07136646	12	114875637		N_Shelf	++++	++++	0.114111	1.82348e-08	0	0	0
cg12841873	6	33423165	ZBTB9	S_Shore	++++	++++	1	1.82971e-08	0	0	0
cg23969423	2	239147605	HES6;HES6	Island	++++	++++	0.150935	1.83037e-08	0	0	0
cg10516516	3	54231340	CACNA2D3		++++	++++	0.311379	1.83692e-08	0	0	0
cg20388256	9	34588432	CNTFR;CNTFR	N_Shore	++++	++++	1	1.86742e-08	0	0	0
cg24690731	8	10589093	SOX7	Island	++++	++++	1	1.87234e-08	0	0	0
cg23015468	7	150678915		S_Shelf	++++	++++	1	1.87332e-08	0	0	0
cg00010946	3	157819282	SHOX2;SHOX2;SHOX2	N_Shore	++++	++++	0.0788612	1.87562e-08	0	0	0
cg02822108	12	126718414			++++	++++	0.791563	1.87726e-08	0	0	0
cg26218577	15	69744466	RPLP1;RPLP1	N_Shore	++++	++++	0.465953	1.87988e-08	0	0	0
cg01351992	16	1210389	CACNA1H;CACNA1H	Island	++++	++++	1	1.89923e-08	0	0	0
cg05746024	1	154540074	CHRNB2	N_Shore	++++	++++	0.368893	1.90775e-08	0	0	0
cg14476358	9	127237646	GPR144	N_Shelf	++++	++++	0.358072	1.90841e-08	0	0	0
cg25204852	18	49865971	DCC	N_Shelf	++++	++++	0.755165	1.91136e-08	0	0	0
cg26128192	6	27256032		N_Shelf	++++	++++	1	1.91988e-08	0	0	0
cg02371798	12	54363657	HOTAIR	N_Shelf	++++	++++	0.24019	1.93693e-08	0	0	0
cg06568815	16	89769091	SPATA2L	S_Shore	++++	++++	1	1.93857e-08	0	0	0
cg07017214	6	30433749		N_Shore	++++	++++	0.136835	1.94087e-08	0	0	0
cg00284259	7	75827723		N_Shelf	++++	++++	0.271046	1.9471e-08	0	0	0
cg10417218	16	56677791	MT1DP;MT1DP	S_Shore	++++	++++	1	1.96382e-08	0	0	0
cg19912309	6	170467967			++++	++++	1	1.97136e-08	0	0	0
cg01782523	1	3712278	LRRC47	N_Shore	++++	++++	1	1.97399e-08	0	0	0
cg09100338	8	48676054		N_Shore	++++	++++	0.540715	1.97628e-08	0	0	0
cg12575771	5	135231577	IL9		++++	++++	0.185463	1.98055e-08	0	0	0
cg03167953	17	74554844	SNORD1C	S_Shore	++++	++++	1	1.98153e-08	0	0	0
cg04049008	8	49438558			++++	++++	0.181102	1.99268e-08	0	0	0
cg10988628	10	135160697	PRAP1;PRAP1		++++	++++	0.439721	1.99333e-08	0	0	0
cg06836380	5	1246795		Island	++++	++++	0.274784	1.99465e-08	0	0	0
cg09391284	3	182401187		S_Shore	++++	++++	0.107454	2.00186e-08	0	0	0
cg27132152	16	88705016	IL17C;IL17C	N_Shore	++++	++++	1	2.00317e-08	0	0	0
cg04440885	16	51146856		N_Shore	++++	++++	1	2.0094e-08	0	0	0
cg19903766	19	36049672	ATP4A	Island	++++	++++	1	2.0094e-08	0	0	0
cg04884090	3	49894441	TRAIP	S_Shore	++++	++++	1	2.01071e-08	0	0	0
cg13484553	9	137990330	OLFM1		++++	++++	0.0664663	2.0153e-08	0	0	0
cg09506029	19	18366283		N_Shelf	++++	++++	0.150541	2.03957e-08	0	0	0
cg01887388	2	81420861		N_Shore	++++	++++	1	2.04809e-08	0	0	0
cg12728061	1	2383438			++++	++++	1	2.06613e-08	0	0	0
cg26334023	17	47287492	ABI3;GNGT2;ABI3		++++	++++	0.444639	2.07302e-08	0	0	0
cg23366050	18	159793	USP14;USP14	S_Shore	++++	++++	1	2.07629e-08	0	0	0
cg25930440	8	144222338			++++	++++	1	2.07793e-08	0	0	0
cg06948492	19	34398264		S_Shore	++++	++++	0.32138	2.08154e-08	0	0	0
cg01785568	4	4864833	MSX1	Island	++++	++++	1	2.0963e-08	0	0	0
cg02031359	5	178367423	ZNF454	N_Shore	++++	++++	0.0623347	2.09794e-08	0	0	0
cg15578645	1	6239157	CHD5	N_Shore	++++	++++	1	2.10515e-08	0	0	0
cg02220125	17	76164117	SYNGR2	N_Shore	++++	++++	1	2.13302e-08	0	0	0
cg13614036	9	139096080	LHX3;LHX3	N_Shore	++++	++++	0.670566	2.13696e-08	0	0	0
cg24772581	4	9782891	DRD5	N_Shore	++++	++++	1	2.13761e-08	0	0	0
cg06434874	11	66248366	DPP3;DPP3	S_Shore	++++	++++	1	2.13892e-08	0	0	0
cg01090433	16	82673506	CDH13		++++	++++	1	2.14843e-08	0	0	0
cg23746359	1	113261764	FAM19A3;FAM19A3	Island	++++	++++	0.94535	2.15073e-08	0	0	0
cg19621179	1	38930900			++++	++++	0.118046	2.15237e-08	0	0	0
cg25408086	12	49109780	CCNT1	N_Shore	++++	++++	1	2.15991e-08	0	0	0
cg04993257	19	5568163	PLAC2	S_Shore	++++	++++	1	2.18057e-08	0	0	0
cg19789473	17	27170043	C17orf63;C17orf63	S_Shore	++++	++++	1	2.18385e-08	0	0	0
cg09448677	11	70672740	SHANK2	N_Shore	++++	++++	1	2.1868e-08	0	0	1
cg03153360	19	55882504	IL11	S_Shore	++++	++++	0.241174	2.18909e-08	0	0	0
cg00157179	1	2383687		N_Shelf	++++	++++	1	2.20877e-08	0	0	0
cg16845265	2	23108342			++++	++++	1	2.21106e-08	0	0	0
cg17834637	19	18340849	PDE4C	N_Shelf	++++	++++	0.992241	2.21172e-08	0	0	0
cg17876758	7	56563742	DKFZp434L192		++++	++++	1	2.21598e-08	0	0	0
cg03060468	5	140683196	SLC25A2	Island	++++	++++	1	2.21598e-08	0	0	0
cg07185854	16	65071589	CDH11		++++	++++	0.240977	2.23434e-08	0	0	0
cg10064322	19	14591203	GIPC1;GIPC1;GIPC1;GIPC1;GIPC1;GIPC1	Island	++++	++++	0.356105	2.23664e-08	0	0	0
cg22280820	11	70958936		N_Shelf	++++	++++	1	2.25369e-08	0	0	0
cg07364906	20	16710288	SNRPB2;SNRPB2	N_Shore	++++	++++	0.0802384	2.26877e-08	0	0	0
cg08902940	1	166272528			++++	++++	0.202645	2.30747e-08	0	0	0
cg04797742	2	45171097	SIX3	Island	++++	++++	1	2.31042e-08	0	0	0
cg20893022	19	4769214	MIR7-3;C19orf30		++++	++++	1	2.31993e-08	0	1	1
cg01683215	22	50454136	TTLL8	Island	++++	++++	1	2.32944e-08	0	0	0
cg01499623	9	33075969	SMU1	N_Shore	++++	++++	0.11962	2.36616e-08	0	0	0
cg26881997	5	1779456			++++	++++	1	2.37043e-08	0	0	0
cg02863339	12	110149510		N_Shore	++++	++++	1	2.37469e-08	0	0	0
cg21223423	9	136472927		N_Shore	++++	++++	1	2.38059e-08	0	0	0
cg27526346	4	21699534	KCNIP4;KCNIP4		++++	++++	1	2.38289e-08	0	0	0
cg06124390	4	2052628		S_Shelf	++++	++++	1	2.40092e-08	0	0	0
cg08310008	12	52836644			++++	++++	0.183266	2.40912e-08	0	0	0
cg23686556	8	131961316	ADCY8		++++	++++	1	2.42289e-08	0	0	0
cg05096751	12	115137775		Island	++++	++++	0.114373	2.4265e-08	0	0	0
cg07540652	8	81805956		Island	++++	++++	0.484316	2.43338e-08	0	0	0
cg07520919	6	160721435			++++	++++	0.0508253	2.43666e-08	0	0	0
cg04004558	16	11348684	SOCS1	Island	++++	++++	1	2.44716e-08	0	0	0
cg00619978	5	180046052	FLT4;FLT4	Island	++++	++++	1	2.44716e-08	0	0	0
cg02456521	19	36046428	ATP4A	N_Shelf	++++	++++	1	2.45207e-08	0	0	0
cg17546649	3	44802566	KIF15;KIAA1143	N_Shore	++++	++++	1	2.46224e-08	0	0	0
cg17076485	11	116580712		S_Shelf	++++	++++	1	2.47732e-08	0	0	0
cg05695995	6	7468848			++++	++++	0.481365	2.47962e-08	0	0	0
cg02873528	1	20691954		N_Shore	++++	++++	1	2.53438e-08	0	0	0
cg23364711	13	110696820			++++	++++	0.337742	2.53766e-08	0	0	0
cg02163378	14	57341666	OTX2OS1		++++	++++	1	2.5429e-08	0	0	0
cg23195200	12	125815880	TMEM132B	S_Shore	++++	++++	0.784021	2.54749e-08	0	0	0
cg16735290	4	648651	PDE6B;PDE6B;PDE6B	N_Shore	++++	++++	1	2.54913e-08	0	0	0
cg00844308	9	99800808	CTSL2	N_Shore	++++	++++	0.668598	2.55504e-08	0	0	0
cg10151957	12	54091604		S_Shelf	++++	++++	0.0958138	2.55536e-08	0	0	0
cg18064256	19	45905621	PPP1R13L;PPP1R13L	N_Shelf	++++	++++	0.0920101	2.56356e-08	0	0	0
cg00474031	8	133494101	KCNQ3	S_Shore	++++	++++	1	2.57864e-08	0	0	0
cg05298224	6	32016360	TNXB		++++	++++	1	2.58192e-08	0	0	0
cg04898719	1	52456918	RAB3B	S_Shore	++++	++++	0.424965	2.58783e-08	0	0	0
cg00996053	1	48575385	SKINTL		++++	++++	0.121161	2.60094e-08	0	0	0
cg11999571	8	25442428			++++	++++	1	2.62226e-08	0	0	0
cg12781794	11	118505740	PHLDB1;PHLDB1;PHLDB1	Island	++++	++++	0.324823	2.62619e-08	0	0	0
cg12866229	4	104640197	TACR3	N_Shore	++++	++++	0.172281	2.62783e-08	0	0	1
cg05105913	17	48422990	XYLT2	Island	++++	++++	1	2.63439e-08	0	0	0
cg09904907	11	66024375	KLC2;KLC2;KLC2;KLC2	N_Shore	++++	++++	1	2.64193e-08	0	0	0
cg09883255	4	1402852		N_Shore	++++	++++	0.164739	2.64521e-08	0	0	0
cg14970046	5	1880021	IRX4	N_Shore	++++	++++	1	2.64718e-08	0	0	0
cg24633656	20	61447194	COL9A3	N_Shore	++++	++++	0.191267	2.64947e-08	0	0	0
cg26945241	2	66185442			++++	++++	1	2.66751e-08	0	0	0
cg00262132	4	113430381		N_Shore	++++	++++	0.572522	2.68751e-08	0	0	0
cg22225577	1	1221823	SCNN1D;SCNN1D		++++	++++	1	2.69046e-08	0	0	0
cg20980321	6	32144667	RNF5;AGPAT1;AGPAT1		++++	++++	0.203039	2.69538e-08	0	0	0
cg06577446	5	145714533		S_Shore	++++	++++	0.216483	2.69767e-08	0	0	0
cg00595030	19	10398582	ICAM4;ICAM4;ICAM4	Island	++++	++++	1	2.70358e-08	0	0	0
cg10454127	16	86386091			++++	++++	0.687289	2.72391e-08	0	0	0
cg01384319	2	134766697		N_Shore	++++	++++	1	2.7462e-08	0	0	0
cg03371613	17	43043737	C1QL1	N_Shore	++++	++++	0.0510876	2.76653e-08	0	0	0
cg09381155	3	134801915	EPHB1		++++	++++	0.288655	2.78129e-08	0	0	0
cg06015834	16	30021696	DOC2A	N_Shore	++++	++++	1	2.78949e-08	0	0	0
cg07815799	2	131674140	ARHGEF4;ARHGEF4	Island	++++	++++	1	2.79113e-08	0	0	0
cg21583957	3	156782951			++++	++++	1	2.79146e-08	0	0	0
cg06852350	15	75119324	CPLX3		++++	++++	0.495792	2.79441e-08	0	0	0
cg13357249	1	151170306	PIP5K1A;PIP5K1A;PIP5K1A;PIP5K1A	N_Shore	++++	++++	1	2.79506e-08	0	0	0
cg19763863	12	115176842		S_Shelf	++++	++++	1	2.84195e-08	0	0	0
cg01815720	1	31277948		N_Shelf	++++	++++	1	2.85376e-08	0	0	0
cg04211303	6	29975675	HLA-J;NCRNA00171	S_Shore	++++	++++	0.750902	2.85802e-08	0	0	0
cg18754388	6	33132637	COL11A2;COL11A2;COL11A2	S_Shelf	++++	++++	1	2.86458e-08	0	0	0
cg14347914	9	96706239		N_Shore	++++	++++	1	2.87638e-08	0	0	0
cg11382589	17	22052191		Island	++++	++++	1	2.88392e-08	0	0	0
cg22115748	15	65342270	OSTBETA		++++	++++	0.0773528	2.89606e-08	0	0	0
cg24084706	19	4475136	HDGF2;HDGF2	S_Shelf	++++	++++	0.0866653	2.90885e-08	0	0	0
cg06628109	16	86275413			++++	++++	0.053842	2.91442e-08	0	0	0
cg25918230	19	36504494	ALKBH6;ALKBH6	N_Shore	++++	++++	1	2.92032e-08	0	0	0
cg21755969	6	160680068	SLC22A2	S_Shore	++++	++++	0.290589	2.92786e-08	0	0	0
cg08387551	5	72417180	TMEM171;TMEM171	S_Shore	++++	++++	1	2.92885e-08	0	0	1
cg21340230	15	89955105		Island	++++	++++	1	2.94e-08	0	0	0
cg27158481	20	25128681	LOC284798;LOC284798;LOC284798	N_Shore	++++	++++	0.360368	2.96459e-08	0	0	1
cg18114036	1	156260918	TMEM79;TMEM79	N_Shore	++++	++++	0.87649	2.97902e-08	0	0	0
cg14259556	13	100630170		N_Shore	++++	++++	0.165494	2.97934e-08	0	0	0
cg06288788	16	65158052		S_Shore	++++	++++	0.425621	3.03115e-08	0	0	0
cg19705131	18	74961163	GALR1	N_Shore	++++	++++	0.815172	3.03509e-08	0	0	0
cg21024234	15	51964706			++++	++++	0.305575	3.0387e-08	0	0	0
cg01038207	3	50330361	HYAL3;IFRD2	S_Shore	++++	++++	0.261963	3.03968e-08	0	0	0
cg03320873	5	176238375	UNC5A	S_Shore	++++	++++	1	3.04001e-08	0	0	0
cg13170705	15	100672282	ADAMTS17		++++	++++	0.521697	3.09214e-08	0	0	0
cg25122233	12	54412506	HOXC4;HOXC5;HOXC6	N_Shore	+++-	++++	1	3.09444e-08	0	0	1
cg01572333	10	64574661	EGR2;EGR2;EGR2;EGR2	Island	++++	++++	1	3.09575e-08	0	0	0
cg01866805	14	100126741	HHIPL1;HHIPL1	S_Shore	++++	++++	1	3.09608e-08	0	0	0
cg02891785	16	71360763			++++	++++	1	3.10231e-08	0	0	0
cg16235809	11	126839681	KIRREL3;KIRREL3		++++	++++	1	3.10428e-08	0	0	0
cg00495988	2	220348803	SPEG	N_Shore	++++	++++	0.0582031	3.12592e-08	0	0	0
cg03272326	1	166136939	FAM78B	S_Shore	++++	++++	1	3.14297e-08	0	0	0
cg02323003	10	130525659			++++	++++	0.058531	3.14789e-08	0	0	0
cg00239835	11	72379867	PDE2A;PDE2A		++++	++++	0.292852	3.15445e-08	0	0	0
cg03136646	1	1567257	MMP23A;MMP23B	Island	++++	++++	1	3.16494e-08	0	0	0
cg04052235	11	122870002			++++	++++	0.0655154	3.17346e-08	0	0	0
cg16387834	15	38334926			++++	++++	0.784349	3.18133e-08	0	0	0
cg25781755	4	13537089		N_Shore	++++	++++	0.123883	3.18232e-08	0	0	0
cg06573459	3	153840654	SGEF	S_Shore	++++	++++	1	3.18297e-08	0	0	0
cg26426245	5	1745535		Island	++++	++++	0.421686	3.18888e-08	0	0	0
cg14569644	12	54408091		N_Shore	++++	++++	1	3.20068e-08	0	0	1
cg24067118	10	102806933		N_Shore	++++	++++	1	3.21806e-08	0	0	0
cg02336869	5	87989373		S_Shelf	++++	++++	1	3.22331e-08	0	0	0
cg19497444	11	2930794	SLC22A18;SLC22A18	Island	++++	++++	0.990601	3.22855e-08	0	0	0
cg07584669	16	54546380			++++	++++	1	3.24036e-08	0	0	0
cg19450816	2	237551858			++++	++++	0.136441	3.24232e-08	0	0	0
cg00179374	7	132259150	PLXNA4;PLXNA4;PLXNA4	N_Shore	++++	++++	0.120964	3.24232e-08	0	0	0
cg01812577	11	62689122	CHRM1	N_Shore	++++	++++	1	3.26331e-08	0	0	0
cg00683984	7	45615337	ADCY1	Island	++++	++++	1	3.30528e-08	0	0	0
cg00547425	6	31829960	NEU1	N_Shore	++++	++++	1	3.31184e-08	0	0	0
cg22488717	2	26785946	C2orf70	Island	++++	++++	0.674828	3.32168e-08	0	0	0
cg04191403	16	87637999	JPH3	S_Shore	++++	++++	1	3.33807e-08	0	0	0
cg16506426	5	72593048		N_Shore	++++	++++	0.30341	3.34463e-08	0	0	0
cg20745381	1	37139265			++++	++++	1	3.34791e-08	0	0	0
cg24992577	5	140431329	PCDHB1		++++	++++	1	3.34791e-08	0	0	0
cg05828497	4	174457692	NBLA00301	N_Shore	++++	++++	1	3.34791e-08	0	0	0
cg04821993	7	73002468			++++	++++	1	3.34791e-08	0	0	0
cg09633881	9	33002021	APTX;APTX	S_Shore	++++	++++	1	3.37414e-08	0	0	0
cg26912718	16	1148520		N_Shelf	++++	++++	1	3.42333e-08	0	0	0
cg13460409	21	38379570	DSCR6	S_Shore	++++	++++	1	3.42989e-08	0	0	0
cg23633547	1	214157565		N_Shore	++++	++++	0.368893	3.443e-08	0	0	0
cg00244308	2	220253656	DNPEP	S_Shore	++++	++++	0.0524976	3.47579e-08	0	0	0
cg17922851	13	96297224	DZIP1;DZIP1	S_Shore	++++	++++	0.12444	3.49219e-08	0	0	0
cg18152276	22	37824806	ELFN2	S_Shore	++++	++++	1	3.50203e-08	0	0	0
cg01414065	7	5911900			++++	++++	0.0767298	3.52826e-08	0	0	0
cg13602816	2	131674221	ARHGEF4;ARHGEF4	S_Shore	++++	++++	1	3.53154e-08	0	0	0
cg10517990	11	1661619	HCCA2		++++	++++	1	3.54137e-08	0	0	0
cg23524559	10	130063978		Island	++++	++++	0.380042	3.56105e-08	0	0	0
cg24793722	4	824416		N_Shelf	++++	++++	0.43349	3.56433e-08	0	0	0
cg09977640	17	77780714		N_Shelf	++++	++++	0.153066	3.56761e-08	0	0	0
cg02377941	16	54973385		S_Shore	++++	++++	1	3.58072e-08	0	0	0
cg02393428	12	106582432			++++	++++	1	3.58072e-08	0	0	0
cg02303805	7	148582347	EZH2;EZH2	S_Shore	++++	++++	0.312756	3.62007e-08	0	0	0
cg16205352	12	49688176	PRPH	N_Shore	++++	++++	1	3.63319e-08	0	0	0
cg05976840	16	67189804	TRADD	S_Shore	++++	++++	1	3.63647e-08	0	0	0
cg10324998	1	92338262	TGFBR3		++++	++++	0.941087	3.6463e-08	0	0	0
cg00028678	2	131674175	ARHGEF4;ARHGEF4	S_Shore	++++	++++	0.369221	3.6627e-08	0	0	0
cg17981552	4	8643813		N_Shelf	++++	++++	0.069024	3.67254e-08	0	0	0
cg10819420	2	237074360	GBX2	Island	++++	++++	0.132179	3.67582e-08	0	0	0
cg06294373	16	20360206	UMOD;UMOD	Island	++++	++++	1	3.67582e-08	0	0	0
cg02466830	3	98376390		Island	++++	++++	1	3.68237e-08	0	0	0
cg01826319	17	35241993			++++	++++	0.0917478	3.68237e-08	0	0	0
cg19205023	10	134001455	DPYSL4	Island	++++	++++	0.651547	3.68565e-08	0	0	0
cg04095810	15	57668087	CGNL1	N_Shore	++++	++++	1	3.70861e-08	0	0	0
cg22382854	17	56124169			++++	++++	0.644661	3.71188e-08	0	0	0
cg24523000	5	161273839	GABRA1;GABRA1;GABRA1		++++	++++	0.460707	3.71188e-08	0	0	0
cg07135540	5	176056414	EIF4E1B;SNCB;SNCB	N_Shore	++++	++++	0.235567	3.72172e-08	0	0	1
cg25214376	10	1781920		S_Shore	++++	++++	0.533501	3.72172e-08	0	0	0
cg04411342	3	133103339	TMEM108;TMEM108		++++	++++	1	3.73812e-08	0	0	0
cg11950778	4	115519006	UGT8	N_Shore	+-++	++++	1	3.7414e-08	0	0	0
cg18848419	18	11850153	CHMP1B;GNAL;GNAL;GNAL	N_Shore	++++	++++	1	3.74468e-08	0	0	0
cg06018514	15	41219741		Island	++++	++++	0.528583	3.75451e-08	0	0	0
cg14265502	19	19319214		N_Shelf	++++	++++	0.367582	3.76107e-08	0	0	0
cg02655195	6	166511914			++++	++++	1	3.77091e-08	0	0	0
cg03315662	16	30759178	PHKG2	N_Shore	++++	++++	0.0887311	3.80698e-08	0	0	0
cg11403428	5	2207052			++++	++++	0.501367	3.81354e-08	0	0	0
cg07844694	10	98946238	SLIT1	Island	++++	++++	0.283867	3.81354e-08	0	0	0
cg14126466	12	114830063	TBX5;TBX5;TBX5;TBX5	N_Shelf	++++	++++	1	3.82337e-08	0	0	0
cg09620131	16	9248481			++++	++++	1	3.82993e-08	0	0	0
cg03610604	1	156851440	NTRK1;NTRK1;NTRK1		++++	++++	0.094699	3.8496e-08	0	0	0
cg13167372	17	70536814		S_Shore	++++	++++	1	3.8496e-08	0	0	0
cg22332076	8	133494940		S_Shore	++++	++++	1	3.85288e-08	0	0	0
cg26572207	8	20161947		S_Shore	++++	++++	0.736475	3.89223e-08	0	1	0
cg14431573	15	52405019	BCL2L10	S_Shore	++++	++++	0.165199	3.89551e-08	0	1	1
cg08655662	6	41438590		Island	++++	++++	1	3.89879e-08	0	0	0
cg03726858	17	75243679		S_Shore	++++	++++	1	3.90207e-08	0	0	0
cg06337557	11	92702373	MTNR1B	N_Shore	++++	++++	0.0536125	3.91191e-08	0	0	0
cg16342298	1	47902085	FOXD2;FOXD2	N_Shore	++++	++++	1	3.91519e-08	0	0	0
cg04593696	16	84076900	SLC38A8		++++	++++	1	3.93486e-08	0	0	0
cg00925339	6	86162725	NT5E	S_Shelf	++++	++++	0.537764	3.93486e-08	0	0	0
cg09808774	17	72933718	OTOP3	S_Shore	++++	++++	0.0889934	3.93814e-08	0	0	0
cg08784247	12	81329808	MIR618;LIN7A	N_Shore	++++	++++	1	3.95453e-08	0	0	0
cg04674389	7	150668669	KCNH2;KCNH2	N_Shelf	++++	++++	1	3.95453e-08	0	0	0
cg24959335	10	15760373	ITGA8	N_Shore	++++	++++	0.126571	3.97421e-08	0	0	0
cg01372551	7	98050564			++++	++++	1	3.99388e-08	0	0	0
cg04788390	1	17933642	ARHGEF10L;ARHGEF10L		++++	++++	1	4.01684e-08	0	0	0
cg19500979	11	67287273	CABP2;CABP2	Island	++++	++++	0.107389	4.02339e-08	0	0	0
cg05656900	2	26235097			++++	++++	0.177659	4.05946e-08	0	0	0
cg19542346	12	58145283	CDK4	N_Shore	++++	++++	1	4.0857e-08	0	0	0
cg09971591	2	131525196	FAM123C;FAM123C;FAM123C;FAM123C		++++	++++	1	4.10537e-08	0	0	0
cg12599850	1	95006451	F3	N_Shore	++++	++++	1	4.12177e-08	0	0	0
cg23351289	19	34849945		N_Shore	++++	++++	1	4.12504e-08	0	0	0
cg00877329	10	100996579	HPSE2;HPSE2;HPSE2;HPSE2	S_Shelf	++++	++++	0.0957811	4.12832e-08	0	0	0
cg13794404	9	126816959			++++	++++	0.2396	4.14144e-08	0	0	0
cg21219903	1	43920090	HYI	S_Shore	+++-	++++	1	4.14144e-08	0	0	0
cg25665622	19	41037912	SPTBN4;SPTBN4	S_Shelf	++++	++++	1	4.15128e-08	0	0	0
cg07458516	1	43854839	MED8;C1orf84;MED8	N_Shore	++++	++++	0.0956171	4.17423e-08	0	0	0
cg05570783	8	71016364			++++	++++	0.760412	4.18735e-08	0	0	0
cg21544805	1	8334656			++++	++++	0.271407	4.20046e-08	0	0	0
cg00014998	2	177014962	HOXD4;MIR10B	Island	++++	++++	0.24829	4.20374e-08	0	0	0
cg16051228	5	1294576	TERT;TERT	Island	++++	++++	1	4.20702e-08	0	0	0
cg16239216	5	532991		N_Shelf	++++	++++	0.103323	4.20702e-08	0	0	0
cg25438746	2	237762237			++++	++++	1	4.23653e-08	0	0	0
cg01057268	11	131341908	NTM		++++	++++	0.296164	4.23981e-08	0	0	0
cg00368577	12	52915064	KRT5		++++	++++	1	4.24309e-08	0	0	0
cg12985245	20	55905076	SPO11;SPO11	S_Shore	++++	++++	1	4.24637e-08	0	0	0
cg26858144	19	54466702	CACNG8	Island	++++	++++	1	4.28244e-08	0	0	0
cg15325042	12	6975769	TPI1;USP5;TPI1;USP5	N_Shore	++++	++++	1	4.28572e-08	0	0	0
cg06136702	6	31082631	PSORS1C1;PSORS1C1		++++	++++	1	4.289e-08	0	0	0
cg11282156	3	63428840	SYNPR;SYNPR;SYNPR		++++	++++	0.104405	4.29228e-08	0	0	0
cg22065894	6	28715027			++++	++++	1	4.30539e-08	0	0	0
cg13222768	13	99195819	STK24		++++	++++	1	4.31195e-08	0	0	0
cg08146733	12	132862587	GALNT9	Island	++++	++++	0.397421	4.31195e-08	0	0	0
cg13632630	15	90206329		N_Shelf	++++	++++	0.273374	4.31523e-08	0	0	0
cg15329642	1	45308298	PTCH2;PTCH2	N_Shore	++++	++++	1	4.31851e-08	0	0	0
cg17045534	8	9791557		S_Shore	++++	++++	1	4.37097e-08	0	0	0
cg18488946	15	25230295	PAR5;SNORD64		++++	++++	1	4.38409e-08	0	0	0
cg24738993	1	18167815			++++	++++	0.0509892	4.38737e-08	0	0	0
cg11223373	19	1449056	APC2	N_Shore	++++	++++	0.095322	4.39065e-08	0	0	1
cg12182937	6	33215649		N_Shore	++++	++++	0.243863	4.40376e-08	0	0	0
cg00785980	13	32984237	N4BP2L1;N4BP2L1		++++	++++	0.226943	4.47918e-08	0	0	0
cg25883020	8	41504993	NKX6-3	S_Shore	++++	++++	1	4.50541e-08	0	1	0
cg04290586	12	108168987	ASCL4;ASCL4	Island	++++	++++	0.334791	4.51853e-08	0	0	0
cg15927720	5	168728149	SLIT3	Island	++++	++++	0.207433	4.52509e-08	0	0	0
cg04752716	19	58728865		S_Shore	++++	++++	1	4.52509e-08	0	0	0
cg00964997	4	13531195		Island	++++	++++	1	4.53165e-08	0	0	0
cg12403132	12	17551396			++++	++++	1	4.53821e-08	0	0	0
cg26994526	18	47719735	MYO5B	N_Shore	++++	++++	1	4.54476e-08	0	0	0
cg12895779	4	185942169		Island	++++	++++	1	4.5546e-08	0	0	0
cg11801011	19	51220537	SHANK1	N_Shore	++++	++++	1	4.56116e-08	0	0	0
cg13587915	10	116307486	ABLIM1;ABLIM1;ABLIM1		++++	++++	0.630561	4.571e-08	0	0	0
cg01079860	2	219828633		S_Shore	++++	++++	1	4.571e-08	0	0	0
cg15440376	4	188101115			++++	++++	0.0644005	4.59395e-08	0	0	0
cg27557134	1	34642345	C1orf94;C1orf94	N_Shore	++++	++++	1	4.60707e-08	0	0	0
cg20212775	4	1164681	SPON2;SPON2	Island	++++	++++	1	4.60707e-08	0	0	0
cg17468267	22	50161123		N_Shelf	++++	++++	1	4.66281e-08	0	0	0
cg02666302	5	180469248	BTNL9		++++	++++	1	4.66937e-08	0	0	0
cg01456663	7	152720150			++++	++++	1	4.6792e-08	0	0	0
cg26670249	19	14223997	PRKACA;PRKACA		++++	++++	1	4.72183e-08	0	0	0
cg18415686	14	36005164	INSM2;INSM2	S_Shore	++++	++++	0.0608592	4.74806e-08	0	0	0
cg08659204	17	35242555			++++	++++	0.407586	4.7579e-08	0	0	0
cg25900631	15	97490760			++++	++++	0.54629	4.76118e-08	0	0	0
cg06447614	16	1195491		N_Shelf	++++	++++	1	4.81692e-08	0	0	0
cg07937453	6	89296807			++++	++++	1	4.82348e-08	0	0	0
cg06575035	5	140744449	PCDHGA4;PCDHGA2;PCDHGA5;PCDHGB2;PCDHGA1;PCDHGB1;PCDHGA3;PCDHGA5	Island	++++	++++	0.769593	4.85299e-08	0	0	0
cg16365373	10	102898409		N_Shore	++++	++++	0.0670238	4.85627e-08	0	0	0
cg24277007	11	78509647	ODZ4		++++	++++	1	4.86283e-08	0	0	0
cg03539340	20	42218758	IFT52	N_Shore	++++	++++	0.478741	4.88251e-08	0	0	0
cg02188443	17	42859171	ADAM11	S_Shelf	++++	++++	0.863374	4.8989e-08	0	0	0
cg05600044	1	222721340	HHIPL2		++++	++++	1	4.90218e-08	0	0	0
cg10498083	6	30428323		N_Shelf	++++	++++	0.280883	4.91202e-08	0	0	0
cg00087153	2	48756079		N_Shore	++++	++++	0.142508	4.92185e-08	0	0	0
cg24899138	5	134872639	NEUROG1	S_Shore	++++	++++	0.162772	4.95137e-08	0	0	0
cg04340553	22	22336396	TOP3B	N_Shore	++++	++++	1	4.96448e-08	0	0	0
cg13256160	10	133946773	JAKMIP3	N_Shore	++++	++++	1	4.97104e-08	0	0	0
cg26811898	4	125824919			++++	++++	0.802384	5.02678e-08	0	0	0
cg00292669	1	28241681	RPA2	S_Shore	++++	++++	0.387256	5.04974e-08	0	0	0
cg04911819	10	24504859	KIAA1217;KIAA1217;KIAA1217		++++	++++	1	5.04974e-08	0	0	0
cg07110008	16	1158991		S_Shelf	++++	++++	0.0622364	5.05957e-08	0	0	0
cg21168489	9	90386382	CTSL3		++++	++++	1	5.06285e-08	0	0	0
cg21426218	20	42350667			++++	++++	0.164903	5.06285e-08	0	0	0
cg07469926	5	114514717	TRIM36;TRIM36;TRIM36	Island	++++	++++	0.216909	5.06941e-08	0	0	1
cg14063331	19	17717790	UNC13A	S_Shore	++++	++++	1	5.09892e-08	0	0	0
cg15442434	6	170210649			++++	++++	1	5.1022e-08	0	0	0
cg10613381	22	24890330	C22orf45;C22orf45;UPB1	N_Shore	++++	++++	0.653187	5.1022e-08	0	0	0
cg15013496	18	76745056	SALL3	S_Shelf	++++	++++	0.203236	5.12516e-08	0	0	0
cg01626707	14	105946891		S_Shore	++++	++++	0.0815828	5.16122e-08	0	0	0
cg22375288	2	121427660			++++	++++	0.548913	5.1645e-08	0	0	0
cg02518691	11	130297149	ADAMTS8	N_Shore	++++	++++	1	5.1809e-08	0	0	0
cg13403503	5	1359585			++++	++++	1	5.2432e-08	0	0	0
cg18811731	1	203086869			++++	++++	1	5.26615e-08	0	0	0
cg25104511	17	38333503	RAPGEFL1	N_Shore	++++	++++	0.283179	5.30878e-08	0	0	0
cg27122132	22	42680319		S_Shore	++++	++++	1	5.31206e-08	0	0	0
cg24317217	3	70231495			++++	++++	0.220975	5.31862e-08	0	0	0
cg26192556	5	101834780	SLCO6A1	S_Shore	++++	++++	1	5.32518e-08	0	0	0
cg20260721	15	63245298		Island	++++	++++	0.479069	5.41371e-08	0	0	0
cg04689048	19	46999289	PNMAL2	Island	++++	++++	0.646301	5.42683e-08	0	0	0
cg05183226	1	228136712	WNT9A	S_Shore	++++	++++	1	5.43339e-08	0	0	0
cg07564287	5	45694523	HCN1	N_Shore	++++	++++	0.0512516	5.4465e-08	0	0	0
cg10582827	6	28584464		S_Shore	++++	++++	1	5.45634e-08	0	1	1
cg07794384	2	131518131	FAM123C;FAM123C;FAM123C;FAM123C	S_Shelf	++++	++++	1	5.49897e-08	0	0	0
cg11937703	5	140307640	PCDHAC1;PCDHA7;PCDHA12;PCDHA6;PCDHA10;PCDHA4;PCDHA11;PCDHA8;PCDHA6;PCDHA1;PCDHA2;PCDHA1;PCDHA9;PCDHAC1;PCDHA13;PCDHA5;PCDHA3;PCDHA10	S_Shore	++++	++++	0.537764	5.5088e-08	0	0	0
cg23926820	12	81694451	PPFIA2		++++	++++	1	5.51864e-08	0	0	0
cg10726868	11	12743980	TEAD1		++++	++++	0.0585638	5.54159e-08	0	0	0
cg02104644	11	61347820	SYT7	Island	++++	++++	1	5.54159e-08	0	0	0
cg19410791	2	87037000	CD8A	Island	++++	++++	1	5.55143e-08	0	0	0
cg22408503	2	98962444	CNGA3;CNGA3	N_Shore	++++	++++	1	5.55471e-08	0	0	0
cg12117212	4	2438678			++++	++++	0.723686	5.57438e-08	0	0	0
cg11118566	5	176057996	EIF4E1B;SNCB;SNCB;EIF4E1B	S_Shore	++++	++++	1	5.57766e-08	0	0	0
cg17227466	5	140748559	PCDHGA4;PCDHGB3;PCDHGA1;PCDHGA5;PCDHGB1;PCDHGA3;PCDHGB3;PCDHGA2;PCDHGB2	N_Shore	++++	++++	1	5.58094e-08	0	0	0
cg14857764	13	50706663		N_Shore	++++	++++	1	5.6039e-08	0	0	0
cg02523679	12	372790	SLC6A13		++++	++++	1	5.60718e-08	0	0	0
cg03605773	1	9488706		N_Shore	++++	++++	1	5.63341e-08	0	0	0
cg17619020	6	3248098			++++	++++	1	5.66292e-08	0	0	0
cg01692978	16	86860774			++++	++++	0.0569243	5.67276e-08	0	0	0
cg07430967	17	72954350	C17orf28		++++	++++	1	5.68915e-08	0	0	0
cg24874425	1	17846708			++++	++++	0.80763	5.70883e-08	0	0	0
cg25031670	1	38964472			++++	++++	0.27603	5.71211e-08	0	0	0
cg20028470	2	27530829	UCN	Island	++++	++++	0.0515139	5.71211e-08	0	0	0
cg05767720	6	32117281	PRRT1	N_Shore	++++	++++	0.153951	5.71866e-08	0	0	1
cg20672477	7	127255591	PAX4;PAX4		++++	++++	0.198317	5.7908e-08	0	0	0
cg20687414	3	44155764	MIR138-1		++++	++++	1	5.79408e-08	0	0	0
cg17396305	6	1594275			++++	++++	0.0679091	5.80064e-08	0	0	0
cg03226114	17	75798752			++++	++++	1	5.80392e-08	0	0	0
cg07186199	14	95243243		S_Shelf	++++	++++	1	5.80392e-08	0	0	0
cg03978961	7	109186249			++++	++++	1	5.86294e-08	0	0	0
cg06797880	14	100112250	HHIPL1;HHIPL1	S_Shore	++++	++++	1	5.8695e-08	0	0	0
cg03283990	15	35129641			++++	++++	1	5.88262e-08	0	0	0
cg13921220	1	18610522	IGSF21		++++	++++	1	5.90885e-08	0	0	0
cg03352402	11	45495631			++++	++++	1	5.90885e-08	0	0	0
cg04847825	10	132239652			++++	++++	0.513499	5.92852e-08	0	0	0
cg06967124	5	180045597	FLT4;FLT4	N_Shore	++++	++++	0.615478	5.9318e-08	0	0	0
cg18232816	12	33591505	SYT10	N_Shore	++++	++++	0.11293	5.96131e-08	0	0	0
cg13687594	1	7122970	CAMTA1	S_Shore	++++	++++	1	5.97443e-08	0	0	0
cg27640316	2	217799104			++++	++++	1	5.98427e-08	0	0	0
cg08098256	8	17322510			++++	++++	0.0528911	5.98755e-08	0	0	0
cg11230031	6	165115084			++++	++++	0.238977	5.99082e-08	0	0	0
cg03665132	1	2137325	C1orf86	Island	++++	++++	0.592196	5.9941e-08	0	0	0
cg14041452	14	38071968		S_Shelf	++++	++++	1	6.00394e-08	0	0	0
cg24893509	18	77547348		N_Shore	++++	++++	1	6.01706e-08	0	0	0
cg07366660	22	45680498	UPK3A;UPK3A	N_Shore	++++	++++	1	6.02034e-08	0	0	0
cg24202119	5	35938692	CAPSL;CAPSL;CAPSL		++++	++++	0.509892	6.05641e-08	0	0	0
cg01371493	6	168916145	SMOC2;SMOC2	N_Shelf	++++	++++	0.464969	6.05641e-08	0	0	0
cg11591267	5	134380219		S_Shelf	++++	++++	0.2416	6.08592e-08	0	0	0
cg04843935	8	110693195	GOLSYN;GOLSYN;GOLSYN;GOLSYN;GOLSYN;GOLSYN		++++	++++	1	6.10231e-08	0	0	0
cg15426626	12	132984261		Island	++++	++++	1	6.13182e-08	0	0	0
cg02121104	14	75470314	EIF2B2	S_Shore	++++	++++	0.068237	6.14166e-08	0	0	0
cg11401957	1	34175169	CSMD2		++++	++++	1	6.18429e-08	0	0	0
cg07425171	16	34442090		Island	++++	++++	1	6.19413e-08	0	0	0
cg04257123	19	51341745		S_Shelf	++++	++++	0.182184	6.1974e-08	0	0	0
cg10577630	12	38550112			++++	++++	1	6.20068e-08	0	0	0
cg15764067	13	28374053		S_Shelf	++++	++++	0.905346	6.22036e-08	0	0	0
cg21215218	1	19011172	PAX7;PAX7;PAX7		++++	++++	1	6.22364e-08	0	0	0
cg11301556	20	44657798	SLC12A5;SLC12A5	Island	++++	++++	1	6.22692e-08	0	0	0
cg19702703	4	7942020	AFAP1;AFAP1	S_Shore	++++	++++	1	6.26954e-08	0	0	0
cg24591300	10	100993025	HPSE2;HPSE2;HPSE2;HPSE2	N_Shore	++++	++++	0.144672	6.28594e-08	0	0	0
cg17889586	19	50794207	MYH14;MYH14;MYH14		++++	++++	1	6.29578e-08	0	0	0
cg11737298	11	132217395			++++	++++	1	6.30889e-08	0	0	0
cg07178733	12	125730928			++++	++++	0.70434	6.34824e-08	0	0	1
cg17069313	4	185018478	ENPP6	Island	++++	++++	1	6.37775e-08	0	0	0
cg04140525	1	153467760			++++	++++	1	6.38103e-08	0	0	0
cg26274090	19	40195028	LGALS14;LGALS14;LGALS14;LGALS14		++++	++++	1	6.41382e-08	0	0	0
cg24471254	7	100253792	ACTL6B	Island	++++	++++	1	6.44333e-08	0	0	0
cg00605063	7	27289128		N_Shore	++++	++++	1	6.46957e-08	0	0	0
cg26931208	19	49244592	IZUMO1;RASIP1	S_Shore	++++	++++	1	6.48596e-08	0	0	0
cg08263507	2	238480950			++++	++++	0.340365	6.48596e-08	0	0	0
cg10259231	16	1133172		S_Shelf	++++	++++	1	6.55482e-08	0	0	0
cg13683550	20	55401918			++++	++++	1	6.56794e-08	0	0	0
cg23439460	10	102809954		Island	++++	++++	1	6.58761e-08	0	0	0
cg26007189	5	176166980		N_Shelf	++++	++++	0.457755	6.61712e-08	0	0	0
cg04386614	7	126364460	GRM8;GRM8;GRM8		++++	++++	0.623347	6.63024e-08	0	0	0
cg14351882	9	140061878	GRIN1;GRIN1;GRIN1	Island	++++	++++	1	6.64663e-08	0	0	0
cg01117549	5	137668198	CDC25C;CDC25C	S_Shore	++++	++++	1	6.65975e-08	0	0	0
cg00610508	16	4013337	ADCY9	N_Shore	++++	++++	1	6.66959e-08	0	0	0
cg26978064	17	70461791			++++	++++	1	6.67615e-08	0	0	0
cg26783079	1	2434058	PLCH2	Island	++++	++++	1	6.68926e-08	0	0	0
cg15053322	22	30867939	SEC14L3		++++	++++	1	6.6991e-08	0	0	0
cg13015284	11	64410392	NRXN2;NRXN2;NRXN2;NRXN2	Island	++++	++++	1	6.71549e-08	0	0	0
cg11019923	15	78557532	DNAJA4;DNAJA4;DNAJA4	Island	++++	++++	1	6.72861e-08	0	0	0
cg03810768	2	109606018	EDAR		++++	++++	1	6.72861e-08	0	0	0
cg00589006	16	70415864	ST3GAL2	Island	++++	++++	0.0837797	6.73517e-08	0	0	0
cg16609260	12	114886059		N_Shore	++++	++++	1	6.73845e-08	0	0	0
cg06631944	7	158365160	PTPRN2;PTPRN2;PTPRN2	S_Shelf	++++	++++	1	6.79091e-08	0	0	0
cg04662609	5	180646976		Island	++++	++++	1	6.81059e-08	0	0	1
cg03161037	17	46808309		N_Shelf	++++	++++	1	6.83026e-08	0	0	0
cg08235551	22	49798682		Island	++++	++++	1	6.83026e-08	0	0	0
cg17463745	1	16554402		S_Shore	++++	++++	1	6.84666e-08	0	0	0
cg27255656	8	4853437	CSMD1	S_Shore	++++	++++	0.337414	6.87617e-08	0	0	0
cg09748946	7	57484821		Island	++++	++++	1	6.91552e-08	0	0	0
cg25687874	17	41522193	MIR2117		++++	++++	1	6.96798e-08	0	0	0
cg15482422	16	66956240	RRAD;RRAD	Island	++++	++++	1	6.97126e-08	0	0	1
cg23348764	5	140749834	PCDHGA4;PCDHGA2;PCDHGB2;PCDHGA1;PCDHGB3;PCDHGB3;PCDHGA5;PCDHGB1;PCDHGA3	N_Shore	++++	++++	1	6.9811e-08	0	0	0
cg19861824	4	16901058	LDB2;LDB2		++++	++++	1	6.9811e-08	0	0	0
cg22959054	12	16761114	LMO3		++++	++++	0.286327	6.99749e-08	0	0	0
cg24984312	11	116707209	APOA1	S_Shore	++++	++++	1	7.01717e-08	0	0	0
cg17098147	10	22634142	SPAG6;SPAG6	Island	++++	++++	1	7.05652e-08	0	0	0
cg20141652	19	19221574	SLC25A42	Island	++++	++++	1	7.10898e-08	0	0	1
cg02595377	2	220387323	ACCN4;ACCN4	Island	++++	++++	0.273768	7.13193e-08	0	0	0
cg04899563	10	135034571	KNDC1	S_Shore	++++	++++	0.366598	7.16145e-08	0	0	0
cg24008358	12	130386672	TMEM132D	N_Shore	++++	++++	0.442672	7.18112e-08	0	0	0
cg05408094	13	113097633			++++	++++	1	7.1844e-08	0	0	0
cg09425333	16	22174091		S_Shore	++++	++++	0.742705	7.19751e-08	0	0	0
cg01707976	16	4991230		S_Shelf	++++	++++	0.200678	7.22047e-08	0	0	0
cg07898713	8	145018822	PLEC1;PLEC1;PLEC1;PLEC1;PLEC1;PLEC1	Island	++++	++++	1	7.22703e-08	0	0	0
cg00774005	7	96633726	DLX6AS	N_Shore	++++	++++	0.0674828	7.33523e-08	0	0	0
cg20924286	3	170136159	CLDN11	N_Shore	++++	++++	1	7.34179e-08	0	0	0
cg04638710	4	183167912			++++	++++	1	7.34507e-08	0	0	0
cg12356107	20	22567037	FOXA2	Island	++++	++++	1	7.35163e-08	0	0	1
cg25340403	19	43969650	LYPD3	S_Shore	++++	++++	0.402339	7.36803e-08	0	0	0
cg25960893	3	181441680	SOX2OT	N_Shelf	++++	++++	0.0957811	7.39426e-08	0	0	0
cg00256593	7	31091245	ADCYAP1R1	N_Shore	++++	++++	1	7.41721e-08	0	0	0
cg25340973	13	48574637	SUCLA2	N_Shore	++++	++++	0.256094	7.46312e-08	0	0	0
cg20131013	17	12692308	RICH2	N_Shore	++++	++++	0.82796	7.48935e-08	0	0	0
cg17233601	11	18814418	PTPN5;PTPN5;PTPN5	S_Shore	++++	++++	0.484316	7.48935e-08	0	0	0
cg23691410	11	94036363			++++	++++	1	7.49263e-08	0	0	0
cg16716752	6	33157811	COL11A2;COL11A2;COL11A2;COL11A2	N_Shelf	++++	++++	0.0503334	7.51886e-08	0	0	0
cg24454109	11	69520271	FGF19	S_Shore	++++	++++	0.0520385	7.53854e-08	0	0	0
cg00653790	15	78031418			++++	++++	0.49612	7.54509e-08	0	0	0
cg03257417	1	111189871			++++	++++	1	7.55165e-08	0	0	0
cg25456849	15	79575334	ANKRD34C;ANKRD34C	N_Shore	++++	++++	1	7.57133e-08	0	0	0
cg03723148	17	43921863	LOC100128977;IMP5		++++	++++	1	7.57461e-08	0	0	0
cg09623773	7	154863381	HTR5A	S_Shore	++++	++++	0.124768	7.61395e-08	0	0	0
cg02207386	7	25895834		N_Shore	++++	++++	1	7.63035e-08	0	0	0
cg05063952	17	37380697	STAC2	N_Shore	++++	++++	0.0976829	7.63691e-08	0	0	0
cg07279157	17	80669878		N_Shore	++++	++++	1	7.70905e-08	0	1	0
cg02825511	16	69344779	VPS4A	N_Shore	++++	++++	0.822058	7.72216e-08	0	0	0
cg26748440	4	21699512	KCNIP4;KCNIP4		++++	++++	1	7.73528e-08	0	0	0
cg26284544	19	7983877	SNAPC2	Island	++++	++++	1	7.74184e-08	0	0	0
cg26147554	18	712733	ENOSF1;ENOSF1;ENOSF1	Island	++++	++++	1	7.74512e-08	0	0	0
cg07507951	1	247096025	AHCTF1	S_Shore	++++	++++	1	7.75495e-08	0	0	0
cg03261800	9	36985761	PAX5	N_Shore	++++	++++	1	7.76151e-08	0	0	0
cg07763376	5	178016195	COL23A1	N_Shore	++++	++++	1	7.76479e-08	0	0	0
cg05620415	16	1961808	HS3ST6	Island	++++	++++	1	7.76479e-08	0	0	0
cg04224786	8	144222401			++++	++++	1	7.82381e-08	0	0	0
cg23125993	5	15426122			++++	++++	1	7.82709e-08	0	0	0
cg08527127	1	34643941	C1orf94;C1orf94	S_Shore	++++	++++	0.405291	7.83037e-08	0	0	0
cg04912710	8	72460643		S_Shore	++++	++++	0.0990273	7.83037e-08	0	0	0
cg00996847	1	59902528	FGGY;FGGY		++++	++++	1	7.83693e-08	0	0	0
cg13008631	2	227663034	IRS1	Island	++++	++++	1	7.86972e-08	0	0	0
cg10180650	20	34962886			++++	++++	0.839765	7.87956e-08	0	0	0
cg15630459	5	175223225	CPLX2	N_Shore	++++	++++	1	7.89267e-08	0	0	0
cg00566982	11	6590092	DNHD1	N_Shore	++++	++++	0.0675812	7.89267e-08	0	0	0
cg21517792	14	105885531	MTA1	S_Shelf	++++	++++	0.356761	7.93202e-08	0	0	0
cg16158681	16	56623109	MT3	Island	++++	++++	0.211368	7.9353e-08	0	0	0
cg01499591	7	140226367	DENND2A		++++	++++	0.275506	7.95498e-08	0	0	0
cg22332257	2	49604189			++++	++++	0.267734	7.96153e-08	0	0	0
cg12014008	10	48439443	GDF10	S_Shore	++++	++++	1	7.96809e-08	0	0	0
cg20648141	11	112292052			++++	++++	0.156542	7.98121e-08	0	0	0
cg24433189	16	1128689	SSTR5;LOC146336	Island	++++	++++	1	7.9976e-08	0	0	0
cg01390950	6	34117273		S_Shelf	++++	++++	0.483988	8.014e-08	0	0	0
cg12110980	11	720454	EPS8L2	N_Shore	++++	++++	1	8.01728e-08	0	0	0
cg00331501	5	37209440	C5orf42	Island	++++	++++	1	8.06318e-08	0	0	1
cg19470841	17	31352187	ACCN1;ACCN1		++++	++++	1	8.12221e-08	0	0	0
cg10957151	2	176986956	HOXD9	Island	++++	++++	0.11621	8.14516e-08	0	0	0
cg02128086	16	86714834		N_Shore	++++	++++	1	8.16156e-08	0	0	0
cg18419276	2	96971862	SNRNP200	S_Shore	++++	++++	0.148672	8.20746e-08	0	0	0
cg03283080	6	1309779		N_Shore	++++	++++	1	8.20746e-08	0	0	0
cg26994023	5	153418932	MFAP3;FAM114A2;MFAP3;MFAP3	S_Shore	++++	++++	0.331184	8.22714e-08	0	0	0
cg21576728	1	113683521			++++	++++	1	8.22714e-08	0	0	0
cg11518839	5	176216711			++++	++++	0.33807	8.23369e-08	0	0	0
cg22061523	17	76183551	AFMID;TK1;AFMID;AFMID	S_Shore	++++	++++	0.182315	8.26321e-08	0	0	1
cg02055540	5	165510804			++++	++++	0.132769	8.27304e-08	0	0	0
cg22746458	10	124906859	HMX2	N_Shore	++++	++++	1	8.29272e-08	0	0	0
cg03214303	19	10196590	C19orf66	N_Shore	++++	++++	0.296492	8.31567e-08	0	0	0
cg01210550	4	3773891		Island	++++	++++	0.42726	8.33535e-08	0	0	0
cg11134430	3	193987426		Island	++++	++++	1	8.36158e-08	0	0	0
cg19656950	13	100607772		N_Shore	++++	++++	0.405291	8.36486e-08	0	0	0
cg00974204	15	71057242	UACA	S_Shore	++++	++++	1	8.41732e-08	0	0	0
cg23118086	15	65360058	RASL12	Island	++++	++++	0.449886	8.43044e-08	0	0	0
cg23274030	10	120925632	SFXN4	S_Shore	++++	++++	1	8.48618e-08	0	0	0
cg12976463	6	50488809			++++	++++	0.180577	8.48946e-08	0	0	0
cg18853199	17	75278035		Island	++++	++++	1	8.49274e-08	0	0	0
cg19878138	7	34395901			++++	++++	0.58695	8.49602e-08	0	0	0
cg13615998	12	54380956	HOXC10	S_Shore	++++	++++	1	8.61406e-08	0	0	0
cg18395531	6	24494605	ALDH5A1;ALDH5A1	N_Shore	++++	++++	0.770905	8.66653e-08	0	0	0
cg00421848	21	35832164	KCNE1;KCNE1;KCNE1	Island	++++	++++	1	8.67965e-08	0	0	0
cg15543027	1	11922765		S_Shelf	++++	++++	1	8.70588e-08	0	0	0
cg18859045	3	53880872	CHDH;IL17RB	S_Shore	++++	++++	1	8.77802e-08	0	0	0
cg06166767	8	41167848	SFRP1	S_Shore	++++	++++	1	8.7813e-08	0	0	0
cg13978566	19	17716539	UNC13A	N_Shore	++++	++++	0.613182	8.82392e-08	0	0	0
cg19603744	19	58554401	ZSCAN1	Island	++++	++++	1	8.84688e-08	0	0	0
cg09346775	4	1028067		N_Shore	++++	++++	1	8.84688e-08	0	0	0
cg09753644	10	134621945		N_Shore	++++	++++	1	8.88623e-08	0	0	0
cg18848287	7	5111641	LOC389458	Island	++++	++++	0.144213	8.92885e-08	0	0	0
cg13335691	7	56242142		N_Shore	++++	++++	1	8.95509e-08	0	0	0
cg27619646	8	41583018	ANK1;ANK1;ANK1;ANK1;ANK1	N_Shore	++++	++++	1	8.97476e-08	0	0	0
cg20700952	19	57630217	USP29	N_Shore	+++-	++++	1	8.98788e-08	0	0	0
cg11301254	5	40756440	TTC33	S_Shore	++++	++++	0.164248	9.02395e-08	0	0	0
cg01992487	16	84268524	KCNG4	N_Shore	++++	++++	1	9.06002e-08	0	0	0
cg00177127	1	22927146	EPHA8	Island	++++	++++	1	9.07313e-08	0	0	0
cg04137702	10	50886878	C10orf53;C10orf53	N_Shore	++++	++++	1	9.09936e-08	0	0	0
cg27138812	17	46827113		N_Shore	++++	++++	1	9.11904e-08	0	0	0
cg11915641	2	103236553	SLC9A2	Island	++++	++++	1	9.1256e-08	0	0	0
cg19515484	6	1606877		Island	++++	++++	1	9.15839e-08	0	0	0
cg11911689	19	19381324	TM6SF2	N_Shelf	++++	++++	1	9.16167e-08	0	0	0
cg16276063	3	181421703	SOX2OT		++++	++++	1	9.1715e-08	0	0	0
cg26410550	15	25229256	PAR5;SNORD64		++++	++++	1	9.20101e-08	0	0	0
cg03215419	2	231851704		N_Shore	++++	++++	1	9.2338e-08	0	0	0
cg06117153	16	85203932		Island	++++	++++	1	9.31578e-08	0	0	0
cg10415103	17	1952815		N_Shore	++++	++++	1	9.34201e-08	0	0	0
cg00767496	15	45671279	LOC145663;GATM	S_Shore	++++	++++	0.0776807	9.37808e-08	0	0	1
cg11176135	14	74705942	VSX2	N_Shore	++++	++++	0.794514	9.40432e-08	0	0	0
cg20464068	1	14026054	PRDM2	N_Shore	++++	++++	0.0857472	9.43383e-08	0	0	0
cg20019489	20	57414351	GNASAS;GNAS	N_Shore	++++	++++	0.0925348	9.44038e-08	0	0	0
cg27046641	8	138039659			++++	++++	0.592852	9.46006e-08	0	0	0
cg14212206	12	54350153	HOXC12	S_Shore	++++	++++	1	9.48629e-08	0	0	0
cg25232043	5	154919818			++++	++++	0.245142	9.49613e-08	0	0	0
cg08160091	4	1398383		Island	++++	++++	0.177823	9.55515e-08	0	0	0
cg24648119	5	140242639	PCDHA6;PCDHA2;PCDHA1;PCDHA9;PCDHA7;PCDHA1;PCDHA6;PCDHA5;PCDHA10;PCDHA3;PCDHA4;PCDHA10;PCDHA8	Island	++++	++++	0.727949	9.57483e-08	0	0	0
cg00868523	19	54387036	PRKCG	S_Shore	++++	++++	1	9.58466e-08	0	0	0
cg12598270	18	32957498	ZNF396	S_Shore	++++	++++	0.0859111	9.6732e-08	0	0	0
cg15457795	3	9747183	CPNE9	S_Shore	++++	++++	1	9.69287e-08	0	0	0
cg11173941	5	2750203	IRX2;IRX2	Island	++++	++++	1	9.85355e-08	0	0	0
cg00941836	22	27834549		Island	++++	++++	1	9.86666e-08	0	0	0
cg20047489	8	65292217		S_Shore	++++	++++	1	9.87978e-08	0	0	0
cg13461273	3	40547232	ZNF620;ZNF620	N_Shore	++++	++++	0.963385	9.92241e-08	0	0	0
cg02690797	19	17759636	UNC13A	S_Shore	++++	++++	1	9.94864e-08	0	0	0
cg26757472	16	86387131			++++	++++	0.0513827	9.96831e-08	0	0	0
cg19514381	7	25899118		S_Shore	++++	++++	1	9.99782e-08	0	0	0
cg10361167	11	69626349	FGF3	S_Shore	++++	++++	0.877146	1.00044e-07	0	0	0
cg16380632	1	7637516	CAMTA1		++++	++++	1	1.00175e-07	0	0	0
cg23607622	20	37211347	ADIG		++++	++++	1	1.00241e-07	0	0	0
cg20442232	5	134465552			++++	++++	0.068237	1.00437e-07	0	0	0
cg07156669	17	28705245	CPD	N_Shore	++++	++++	1	1.01257e-07	0	0	0
cg12871835	6	134639417	SGK1	S_Shore	++++	++++	0.181036	1.02405e-07	0	0	0
cg06203364	1	2137307	C1orf86	Island	++++	++++	0.156935	1.02536e-07	0	0	0
cg17315281	4	7193783	SORCS2	N_Shore	++++	++++	0.174118	1.02798e-07	0	0	0
cg19719678	2	240972734			++++	++++	1	1.03126e-07	0	0	0
cg11751545	11	126434315	KIRREL3;KIRREL3		++++	++++	1	1.03323e-07	0	0	0
cg02330874	10	71339632		S_Shore	++++	++++	1	1.03356e-07	0	0	0
cg13844193	1	91193193		S_Shore	++++	++++	1	1.04602e-07	0	0	0
cg12752627	10	94827528	CYP26C1	N_Shore	++++	++++	0.0853865	1.04733e-07	0	0	0
cg19772011	6	39015339	GLP1R	N_Shore	++++	++++	1	1.0529e-07	0	0	0
cg15226102	11	69469719		S_Shore	++++	++++	0.281802	1.0529e-07	0	0	0
cg05316694	14	99786833			++++	++++	0.143622	1.05585e-07	0	0	0
cg17658213	17	8218709	ARHGEF15		++++	++++	1	1.05913e-07	0	0	0
cg08541497	8	124253829	C8orf76	S_Shore	++++	++++	0.261012	1.05946e-07	0	0	0
cg12135976	12	101604147	SLC5A8	S_Shore	++++	++++	0.0823042	1.06471e-07	0	0	0
cg16505764	5	140763254	PCDHGA4;PCDHGA7;PCDHGA6;PCDHGA1;PCDHGA5;PCDHGB1;PCDHGA3;PCDHGA2;PCDHGB2;PCDHGA7;PCDHGB3	N_Shore	++++	++++	0.626626	1.06504e-07	0	0	0
cg15859635	11	61519787	C11orf9	Island	++++	++++	1	1.06995e-07	0	0	0
cg22976218	2	182544321	NEUROD1	N_Shelf	++++	++++	1	1.07291e-07	0	0	0
cg14201467	11	115372348	CADM1;CADM1	N_Shore	++++	++++	0.812549	1.08143e-07	0	0	1
cg26302230	2	219733839	WNT6	N_Shelf	++++	++++	1	1.08373e-07	0	0	0
cg00521703	19	34112157	CHST8;CHST8	N_Shore	++++	++++	0.064171	1.08504e-07	0	0	0
cg03522256	12	114049895			++++	++++	0.308657	1.08733e-07	0	0	0
cg06638966	6	70576321	COL19A1	N_Shore	++++	++++	1	1.08832e-07	0	0	0
cg26555777	19	38885050	SPRED3;SPRED3	N_Shore	++++	++++	1	1.09225e-07	0	0	0
cg10231049	4	3769754	ADRA2C;ADRA2C	Island	++++	++++	0.622692	1.09356e-07	0	0	0
cg27096298	5	92904875	FLJ42709;FLJ42709;FLJ42709	N_Shore	++++	++++	1	1.0975e-07	0	0	0
cg14299483	14	101967780			++++	++++	0.292688	1.09848e-07	0	0	0
cg05941575	18	48255545	MAPK4	Island	++++	++++	1	1.10537e-07	0	0	0
cg20933713	1	175713219	TNR		++++	++++	0.390207	1.11357e-07	0	0	0
cg17624196	10	131841008		N_Shelf	++++	++++	1	1.1152e-07	0	0	0
cg10759651	1	163144950	RGS5		++++	++++	0.0874851	1.12439e-07	0	0	0
cg19059861	20	31823761	PLUNC;PLUNC		++++	++++	1	1.12537e-07	0	0	0
cg13271951	16	30041760	FAM57B	N_Shore	++++	++++	0.0721391	1.12898e-07	0	0	0
cg06566034	18	47825363		S_Shore	++++	++++	0.213532	1.13357e-07	0	0	1
cg15474615	3	134370182	KY	Island	++++	++++	0.88272	1.14078e-07	0	0	0
cg01085224	5	5139626	ADAMTS16	Island	++++	++++	1	1.14636e-07	0	0	0
cg25477813	19	55688114	SYT5	N_Shelf	++++	++++	1	1.14701e-07	0	0	0
cg19441349	19	42495372	ATP1A3	N_Shelf	++++	++++	1	1.14734e-07	0	0	0
cg18419175	7	6199980	USP42	S_Shore	++++	++++	1	1.17849e-07	0	0	0
cg13302994	2	210714233	UNC80;UNC80		++++	++++	0.422342	1.18406e-07	0	0	0
cg22437586	2	21865792			++++	++++	1	1.2044e-07	0	0	0
cg26522894	12	130389541	TMEM132D	S_Shore	++++	++++	1	1.20636e-07	0	0	0
cg06819718	2	45235241	SIX2	N_Shore	++++	++++	1	1.20899e-07	0	0	0
cg19914904	10	102756165	LZTS2	N_Shore	++++	++++	1	1.20931e-07	0	0	0
cg11631158	13	26623620	SHISA2	N_Shore	++++	++++	0.749919	1.22374e-07	0	0	0
cg00238249	6	71276258	C6orf57	N_Shore	++++	++++	1	1.22768e-07	0	0	0
cg05043557	17	6460360	PITPNM3;PITPNM3	S_Shore	++++	++++	0.0554487	1.23358e-07	0	0	0
cg25615068	12	121443309	C12orf43		++++	++++	1	1.23981e-07	0	0	0
cg23666378	1	3663164	KIAA0495;KIAA0495	Island	++++	++++	1	1.24276e-07	0	0	0
cg03867429	7	57483183		N_Shore	++++	++++	1	1.24374e-07	0	0	0
cg10720545	19	45504295	RELB	N_Shore	++++	++++	1	1.24669e-07	0	0	1
cg05487664	11	61277316	LRRC10B	Island	++++	++++	1	1.24801e-07	0	0	0
cg06024540	6	32135396	EGFL8	S_Shore	++++	++++	0.0531534	1.24965e-07	0	0	0
cg02351555	19	1526463	PLK5P	Island	++++	++++	1	1.25129e-07	0	0	0
cg20977864	16	71264290	HYDIN;HYDIN	N_Shore	++++	++++	0.0969615	1.26899e-07	0	0	0
cg07538634	19	3825141	ZFR2	Island	++++	++++	0.726637	1.2703e-07	0	0	0
cg04235071	15	75119335	CPLX3		++++	++++	1	1.27424e-07	0	0	0
cg23197405	12	54451938	FLJ12825	N_Shelf	++++	++++	1	1.27522e-07	0	1	1
cg10605064	11	8290815		S_Shore	++++	++++	1	1.27588e-07	0	0	0
cg18894214	5	3181925			++++	++++	1	1.27653e-07	0	0	0
cg23694371	15	26967579	GABRB3;GABRB3		++++	++++	1	1.28801e-07	0	0	0
cg18351683	13	31926752			++++	++++	1	1.28998e-07	0	0	0
cg22741264	12	115105519		Island	++++	++++	0.128244	1.29424e-07	0	0	0
cg24725079	7	132262675	PLXNA4;PLXNA4;PLXNA4	S_Shore	++++	++++	1	1.29752e-07	0	0	0
cg01976623	14	94255901	PRIMA1	S_Shore	++++	++++	1	1.30014e-07	0	0	0
cg14681171	8	37309811			++++	++++	0.0896492	1.30408e-07	0	0	0
cg25574111	19	46544802	IGFL4		+++-	++++	1	1.30506e-07	0	0	0
cg15822394	19	17877733	FCHO1;FCHO1;FCHO1;FCHO1	Island	++++	++++	0.100405	1.30539e-07	0	0	0
cg12899747	3	25391527			++++	++++	1	1.30605e-07	0	0	0
cg14792480	16	66954257	CDH16	N_Shore	++++	++++	0.0631217	1.30703e-07	0	0	0
cg10963398	17	72932651	OTOP3	S_Shore	++++	++++	1	1.30703e-07	0	0	0
cg10127085	11	61332706	SYT7	N_Shelf	++++	++++	0.237043	1.31293e-07	0	0	0
cg06671087	9	37033489	PAX5	N_Shore	++++	++++	1	1.31359e-07	0	1	1
cg07189222	6	32847527	PPP1R2P1	Island	++++	++++	1	1.31687e-07	0	0	0
cg00164189	22	30821186	MTP18;MTP18;SEC14L2	N_Shore	++++	++++	1	1.32146e-07	0	0	0
[truncated: 10,179 more rows]

## Sheet: Legend
CpG probe	CpG probe from Illumina 450k
CHR	chromosome
MAPINFO	coordinates of the probe in the chromosome
UCSC_REFGENE_NAME	name of the Gene according to UCSC Genome Browser
RELATION_TO_UCSC_CPG_ISLAND	position of the CpG probe according to the CpG island (Island: within the CpG island; N-Shore: shore at the 5’ of the CpG island; S-Shore: shore at the 3’ of the CpG island; N-Shelf: shelf at the 5’ of the CpG island; Shores are defined as the 2000 bp upstream and downstream the CpG islands; Shelves are defined as the regions at 2000-4000 bp upstream and downstream the islands
Direction in females	Direction of the change in variability with age in females (+: increases; -: decreeases); Datasets order: GSE40279, GSE87571, EPIC and GSE55763
Direction in males	Direction of the change in variability with age in males (+: increases; -: decreeases); Datasets order: GSE40279, GSE87571, EPIC and GSE55763
Bonferroni corrected p-value in females	p-value resulting from the meta-analysis of the Breusch-Pagan test on the dependency of adjusted beta values on age in females in the 4 datasets, after Bonferroni correction
Bonferroni corrected p-value in males	p-value resulting from the meta-analysis of the Breusch-Pagan test on the dependency of adjusted beta values on age in males in the 4 datasets, after Bonferroni correction
sDMP in Inoshita et al., 2015	1: the probe was reported as differentially methylated between males and females in Inoshita et al., 2015
sDMP in Singmann et al., 2015	1: the probe was reported as differentially methylated between males and females in Singmann et al., 2015
sDMP in Yousefi et al., 2015	1: the probe was reported as differentially methylated between males and females in Yousefi et al., 2015
